# Supplementary material
Source: PubMed Central journal article supplement (PMC5581221)
Supplement: NIHMS893270-supplement-Supp_info.pdf [file NIHMS893270-supplement-Supp_info.pdf]

| Accession Number | Protein Name                                                                                           |
|------------------|--------------------------------------------------------------------------------------------------------|
| 1433E_RAT        | 14-3-3 protein epsilon GN=Ywhae PE=1 SV=1                                                              |
| 1433F_RAT        | 14-3-3 protein eta GN=Ywhah PE=1 SV=2                                                                  |
| 1433G_RAT        | 14-3-3 protein gamma GN=Ywhag PE=1 SV=2                                                                |
| 1433T_RAT        | 14-3-3 protein theta GN=Ywhaq PE=1 SV=1                                                                |
| 1433Z_RAT        | 14-3-3 protein zeta/delta GN=Ywhaz PE=1 SV=1                                                           |
| 2ABA_RAT         | Serine/threonine-protein phosphatase 2A 55 kDa regulatory subunit B alpha isoform GN=Ppp2r2a PE=2 SV=1 |
| 3BHS4_RAT        | 3 beta-hydroxysteroid dehydrogenase/Delta 5-->4-isomerase type 4 GN=Hsd3b6 PE=2 SV=4                   |
| 3HIDH_RAT        | 3-hydroxyisobutyrate dehydrogenase, mitochondrial GN=Hibadh PE=1 SV=3                                  |
| 4F2_RAT          | 4F2 cell-surface antigen heavy chain GN=Slc3a2 PE=1 SV=1                                               |
| 5NTD_RAT         | 5'-nucleotidase GN=Nt5e PE=1 SV=1                                                                      |
| 6PGD_RAT         | 6-phosphogluconate dehydrogenase, decarboxylating GN=Pgd PE=1 SV=1                                     |
| A0JN30_RAT       | Canopy 2 homolog (Zebrafish) GN=Cnpy2 PE=2 SV=1                                                        |
| A0JPL2_RAT       | Casein kinase 1, alpha 1, isoform CRA_d GN=Csnk1a1 PE=2 SV=1                                           |
| A1AT_RAT         | Alpha-1-antiproteinase GN=Serpina1 PE=1 SV=2                                                           |
| A1I3_RAT         | Alpha-1-inhibitor 3 GN=A1i3 PE=1 SV=1                                                                  |
| A1L1J8_RAT       | Protein Rab5b GN=Rab5b PE=2 SV=1                                                                       |
| A1L1M0_RAT       | Protein kinase, cAMP-dependent, catalytic, alpha GN=Prkaca PE=2 SV=1                                   |
| A1M_RAT          | Alpha-1-macroglobulin GN=A1m PE=1 SV=1                                                                 |
| A2MG_RAT         | Alpha-2-macroglobulin GN=A2m PE=2 SV=2                                                                 |
| A3E0T0_RAT       | Erythrocyte protein band 4.1-like 3 GN=Epb41l3 PE=2 SV=1                                               |
| A9UMV9_RAT       | Ndufa7 protein GN=Ndufa7l PE=4 SV=1                                                                    |
| A9UMW3_RAT       | Erythroid associated factor GN=Ahsf PE=4 SV=1                                                          |
| AAPK1_RAT        | 5'-AMP-activated protein kinase catalytic subunit alpha-1 GN=Prkaa1 PE=1 SV=2                          |
| AATM_RAT         | Aspartate aminotransferase, mitochondrial GN=Got2 PE=1 SV=2                                            |
| ABCD3_RAT        | ATP-binding cassette sub-family D member 3 GN=Abcd3 PE=1 SV=3                                          |
| ABCF1_RAT        | ATP-binding cassette sub-family F member 1 GN=Abcf1 PE=1 SV=1                                          |
| ABCG2_RAT        | ATP-binding cassette sub-family G member 2 GN=Abcg2 PE=1 SV=1                                          |
| ABD12_RAT        | Monoacylglycerol lipase ABHD12 GN=Abhd12 PE=2 SV=1                                                     |
| ABHD6_RAT        | Monoacylglycerol lipase ABHD6 GN=Abhd6 PE=1 SV=1                                                       |
| ABHGA_RAT        | Abhydrolase domain-containing protein 16A GN=Abhd16a PE=2 SV=1                                         |
| ABI1_RAT         | Abl interactor 1 GN=Abi1 PE=1 SV=3                                                                     |
| ACADL_RAT        | Long-chain specific acyl-CoA dehydrogenase, mitochondrial GN=Acadl PE=1 SV=1                           |
| ACADM_RAT        | Medium-chain specific acyl-CoA dehydrogenase, mitochondrial GN=Acadm PE=1 SV=1                         |
| ACADV_RAT        | Very long-chain specific acyl-CoA dehydrogenase, mitochondrial GN=Acadvl PE=1 SV=1                     |
| ACD11_RAT        | Acyl-CoA dehydrogenase family member 11 GN=Acad11 PE=1 SV=1                                            |
| ACE2_RAT         | Angiotensin-converting enzyme 2 GN=Ace2 PE=1 SV=1                                                      |
| ACON_RAT         | Aconitate hydratase, mitochondrial GN=Aco2 PE=1 SV=2                                                   |
| ACOT8_RAT        | Acyl-coenzyme A thioesterase 8 GN=Acot8 PE=2 SV=1                                                      |
| ACPH_RAT         | Acylamino-acid-releasing enzyme GN=Apeh PE=1 SV=1                                                      |
| ACSF2_RAT        | Acyl-CoA synthetase family member 2, mitochondrial GN=Acsf2 PE=2 SV=1                                  |
| ACSL1_RAT        | Long-chain-fatty-acid--CoA ligase 1 GN=Acsl1 PE=1 SV=1                                                 |
| ACTC_RAT         | Actin, alpha cardiac muscle 1 GN=Actc1 PE=2 SV=1                                                       |
| ACTG_RAT         | Actin, cytoplasmic 2 GN=Actg1 PE=1 SV=1                                                                |
| ACTN1_RAT        | Alpha-actinin-1 GN=Actn1 PE=1 SV=1                                                                     |
| ACTN4_RAT        | Alpha-actinin-4 GN=Actn4 PE=1 SV=2                                                                     |
| ACTZ_RAT         | Alpha-centractin GN=Actr1a PE=1 SV=1                                                                   |
| ADAS_RAT         | Alkyldihydroxyacetonephosphate synthase, peroxisomal GN=Agps PE=2 SV=1                                 |
| ADA_RAT          | Adenosine deaminase GN=Ada PE=1 SV=3                                                                   |
| ADH1_RAT         | Alcohol dehydrogenase 1 GN=Adh1 PE=1 SV=3                                                              |
| ADHX_RAT         | Alcohol dehydrogenase class-3 GN=Adh5 PE=1 SV=2                                                        |
| ADRO_RAT         | NADPH:adrenodoxin oxidoreductase, mitochondrial GN=Fdxr PE=1 SV=1                                      |
| ADT1_RAT         | ADP/ATP translocase 1 GN=Slc25a4 PE=1 SV=3                                                             |
| ADT2_RAT         | ADP/ATP translocase 2 GN=Slc25a5 PE=1 SV=3                                                             |
| ADX_RAT          | Adrenodoxin, mitochondrial GN=Fdx1 PE=2 SV=1                                                           |
| AFAM_RAT         | Afamin GN=Afm PE=3 SV=1                                                                                |
| AFAP1_RAT        | Actin filament-associated protein 1 GN=Afap1 PE=1 SV=1                                                 |
| AGFG1_RAT        | Arf-GAP domain and FG repeat-containing protein 1 GN=Agfg1 PE=1 SV=1                                   |
| AGO2_RAT         | Protein argonaute-2 GN=Ago2 PE=2 SV=2                                                                  |
| AIFM1_RAT        | Apoptosis-inducing factor 1, mitochondrial GN=Aifm1 PE=1 SV=1                                          |
| AIMP2_RAT        | Aminoacyl tRNA synthase complex-interacting multifunctional protein 2 GN=Aimp2 PE=2 SV=1               |

|           |                                                                                   |
|-----------|-----------------------------------------------------------------------------------|
| AK1A1_RAT | Alcohol dehydrogenase [NADP(+)] GN=Akr1a1 PE=1 SV=2                               |
| AKAP2_RAT | A-kinase anchor protein 2 GN=Akap2 PE=1 SV=1                                      |
| AL1L1_RAT | Cytosolic 10-formyltetrahydrofolate dehydrogenase GN=Aldh1l1 PE=1 SV=3            |
| AL7A1_RAT | Alpha-aminoacidic semialdehyde dehydrogenase GN=Aldh7a1 PE=1 SV=2                 |
| AL9A1_RAT | 4-trimethylaminobutyraldehyde dehydrogenase GN=Aldh9a1 PE=1 SV=1                  |
| ALBU_RAT  | Serum albumin GN=Alb PE=1 SV=2                                                    |
| ALDH2_RAT | Aldehyde dehydrogenase, mitochondrial GN=Aldh2 PE=1 SV=1                          |
| ALDOA_RAT | Fructose-bisphosphate aldolase A GN=Aldoa PE=1 SV=2                               |
| ALDR_RAT  | Aldose reductase GN=Akr1b1 PE=1 SV=3                                              |
| AMBP_RAT  | Protein AMBP GN=Ambp PE=1 SV=1                                                    |
| AMPD3_RAT | AMP deaminase 3 GN=Ampd3 PE=2 SV=2                                                |
| AMPN_RAT  | Aminopeptidase N GN=Anpep PE=1 SV=2                                               |
| AMRP_RAT  | Alpha-2-macroglobulin receptor-associated protein GN=Lrpap1 PE=1 SV=2             |
| AN32A_RAT | Acidic leucine-rich nuclear phosphoprotein 32 family member A GN=Anp32a PE=2 SV=1 |
| AN32B_RAT | Acidic leucine-rich nuclear phosphoprotein 32 family member B GN=Anp32b PE=2 SV=1 |
| ANM1_RAT  | Protein arginine N-methyltransferase 1 GN=Prmt1 PE=1 SV=1                         |
| ANXA1_RAT | Annexin A1 GN=Anxa1 PE=1 SV=2                                                     |
| ANXA3_RAT | Annexin A3 GN=Anxa3 PE=1 SV=4                                                     |
| ANXA5_RAT | Annexin A5 GN=Anxa5 PE=1 SV=3                                                     |
| ANXA6_RAT | Annexin A6 GN=Anxa6 PE=1 SV=2                                                     |
| ANXA8_RAT | Annexin A8 GN=Anxa8 PE=1 SV=1                                                     |
| AOC1_RAT  | Amiloride-sensitive amine oxidase [copper-containing] GN=Aoc1 PE=2 SV=1           |
| AP2A2_RAT | AP-2 complex subunit alpha-2 GN=Ap2a2 PE=1 SV=3                                   |
| AP2M1_RAT | AP-2 complex subunit mu GN=Ap2m1 PE=1 SV=1                                        |
| AP2S1_RAT | AP-2 complex subunit sigma GN=Ap2s1 PE=1 SV=1                                     |
| AP3M1_RAT | AP-3 complex subunit mu-1 GN=Ap3m1 PE=1 SV=1                                      |
| APEX1_RAT | DNA-(apurinic or apyrimidinic site) lyase GN=Apex1 PE=1 SV=2                      |
| APOA1_RAT | Apolipoprotein A-I GN=Apoa1 PE=1 SV=2                                             |
| APOA2_RAT | Apolipoprotein A-II GN=Apoa2 PE=2 SV=1                                            |
| APOA4_RAT | Apolipoprotein A-IV GN=Apoa4 PE=2 SV=2                                            |
| APOB_RAT  | Apolipoprotein B-100 GN=Apob PE=1 SV=1                                            |
| APOC1_RAT | Apolipoprotein C-I GN=Apoc1 PE=2 SV=1                                             |
| APOE_RAT  | Apolipoprotein E GN=Apoe PE=1 SV=2                                                |
| APT_RAT   | Adenine phosphoribosyltransferase GN=Aprt PE=1 SV=1                               |
| AQP1_RAT  | Aquaporin-1 GN=Aqp1 PE=2 SV=4                                                     |
| ARC1A_RAT | Actin-related protein 2/3 complex subunit 1A GN=Arpc1a PE=2 SV=1                  |
| ARC1B_RAT | Actin-related protein 2/3 complex subunit 1B GN=Arpc1b PE=2 SV=3                  |
| ARF3_RAT  | ADP-ribosylation factor 3 GN=Arf3 PE=1 SV=2                                       |
| ARF5_RAT  | ADP-ribosylation factor 5 GN=Arf5 PE=1 SV=2                                       |
| ARF6_RAT  | ADP-ribosylation factor 6 GN=Arf6 PE=1 SV=2                                       |
| ARFG3_RAT | ADP-ribosylation factor GTPase-activating protein 3 GN=Arfgap3 PE=2 SV=1          |
| ARFP1_RAT | Arfaptin-1 GN=Arfp1 PE=2 SV=1                                                     |
| ARHG1_RAT | Rho guanine nucleotide exchange factor 1 GN=Arhgef1 PE=1 SV=1                     |
| ARHG2_RAT | Rho guanine nucleotide exchange factor 2 GN=Arhgef2 PE=2 SV=1                     |
| ARHG6_RAT | Rho guanine nucleotide exchange factor 6 GN=Arhgef6 PE=2 SV=1                     |
| ARK72_RAT | Aflatoxin B1 aldehyde reductase member 2 GN=Akr7a2 PE=1 SV=2                      |
| ARL1_RAT  | ADP-ribosylation factor-like protein 1 GN=Arl1 PE=1 SV=1                          |
| ARL8B_RAT | ADP-ribosylation factor-like protein 8B GN=Arl8b PE=2 SV=1                        |
| ARLY_RAT  | Argininosuccinate lyase GN=Asl PE=2 SV=1                                          |
| ARM10_RAT | Armadillo repeat-containing protein 10 GN=Armc10 PE=2 SV=1                        |
| ARP2_RAT  | Actin-related protein 2 GN=Actr2 PE=1 SV=1                                        |
| ARP3_RAT  | Actin-related protein 3 GN=Actr3 PE=1 SV=1                                        |
| ARPC2_RAT | Actin-related protein 2/3 complex subunit 2 GN=Arpc2 PE=1 SV=1                    |
| ARPC5_RAT | Actin-related protein 2/3 complex subunit 5 GN=Arpc5 PE=1 SV=3                    |
| ASAH1_RAT | Acid ceramidase GN=Asah1 PE=2 SV=1                                                |
| ASCC3_RAT | Activating signal cointegrator 1 complex subunit 3 GN=Ascc3 PE=3 SV=1             |
| ASSY_RAT  | Argininosuccinate synthase GN=Ass1 PE=2 SV=1                                      |
| AT1A1_RAT | Sodium/potassium-transporting ATPase subunit alpha-1 GN=Atp1a1 PE=1 SV=1          |
| AT1B1_RAT | Sodium/potassium-transporting ATPase subunit beta-1 GN=Atp1b1 PE=1 SV=1           |
| AT1B3_RAT | Sodium/potassium-transporting ATPase subunit beta-3 GN=Atp1b3 PE=2 SV=1           |
| AT5F1_RAT | ATP synthase F(0) complex subunit B1, mitochondrial GN=Atp5f1 PE=1 SV=1           |

|            |                                                                                               |
|------------|-----------------------------------------------------------------------------------------------|
| ATAD1_RAT  | ATPase family AAA domain-containing protein 1 GN=Atad1 PE=1 SV=1                              |
| ATAD3_RAT  | ATPase family AAA domain-containing protein 3 GN=Atad3 PE=1 SV=1                              |
| ATP5H_RAT  | ATP synthase subunit d, mitochondrial GN=Atp5h PE=1 SV=3                                      |
| ATP5I_RAT  | ATP synthase subunit e, mitochondrial GN=Atp5i PE=1 SV=3                                      |
| ATP5J_RAT  | ATP synthase-coupling factor 6, mitochondrial GN=Atp5j PE=1 SV=1                              |
| ATP5L_RAT  | ATP synthase subunit g, mitochondrial GN=Atp5l PE=1 SV=2                                      |
| ATPA_RAT   | ATP synthase subunit alpha, mitochondrial GN=Atp5a1 PE=1 SV=2                                 |
| ATPB_RAT   | ATP synthase subunit beta, mitochondrial GN=Atp5b PE=1 SV=2                                   |
| ATPD_RAT   | ATP synthase subunit delta, mitochondrial GN=Atp5d PE=1 SV=2                                  |
| ATPK_RAT   | ATP synthase subunit f, mitochondrial GN=Atp5j2 PE=1 SV=1                                     |
| ATPO_RAT   | ATP synthase subunit O, mitochondrial GN=Atp5o PE=1 SV=1                                      |
| ATX10_RAT  | Ataxin-10 GN=Atxn10 PE=1 SV=1                                                                 |
| AUP1_RAT   | Ancient ubiquitous protein 1 GN=Aup1 PE=2 SV=1                                                |
| BOBMS8_RAT | Myl9 protein GN=Myl9 PE=2 SV=1                                                                |
| BOBMT9_RAT | Protein Sqrdl GN=Sqrdl PE=2 SV=1                                                              |
| BOBMW0_RAT | RAB14, member RAS oncogene family GN=Rab14 PE=2 SV=1                                          |
| BOBMX3_RAT | Protein S100a16 GN=S100a16 PE=2 SV=1                                                          |
| BOBN02_RAT | Mtx1 protein GN=Mtx1 PE=2 SV=1                                                                |
| BOBN20_RAT | Protein Tspan6 GN=Tspan6 PE=2 SV=1                                                            |
| BOBN30_RAT | Mtch1 protein GN=Mtch1 PE=2 SV=1                                                              |
| BOBN51_RAT | Small nuclear ribonucleoprotein-associated protein GN=Snrpb PE=2 SV=1                         |
| BOBN52_RAT | Mitochondrial carrier homolog 2 (C. elegans) GN=Mtch2 PE=2 SV=1                               |
| BOBN65_RAT | Family with sequence similarity 49, member A GN=Fam49a PE=2 SV=1                              |
| BOBN81_RAT | 40S ribosomal protein S5 GN=Rps5 PE=2 SV=1                                                    |
| BOBNB0_RAT | Golt1b protein GN=Golt1b PE=2 SV=1                                                            |
| BOBNB9_RAT | HtrA serine peptidase 2 GN=Htra2 PE=2 SV=1                                                    |
| BOBNE6_RAT | NADH dehydrogenase (Ubiquinone) Fe-S protein 8 (Predicted), isoform CRA_a GN=Ndufs8 PE=2 SV=1 |
| BOBNG3_RAT | Lman2 protein GN=Lman2 PE=2 SV=1                                                              |
| BOBNJ0_RAT | Protein Sin3b GN=Sin3b PE=2 SV=1                                                              |
| BOBNJ1_RAT | LOC683667 protein GN=Sri PE=2 SV=1                                                            |
| BOBNJ2_RAT | CEA-related cell adhesion molecule 12 (Predicted) GN=Igf13 PE=2 SV=1                          |
| BOBNJ4_RAT | Ethylmalonic encephalopathy 1 GN=Ethe1 PE=2 SV=1                                              |
| BOBNK1_RAT | Protein Rab5c GN=Rab5c PE=2 SV=1                                                              |
| BOK008_RAT | Eukaryotic translation initiation factor 1 GN=Eif11i PE=4 SV=1                                |
| BOK010_RAT | Protein Txndc17 GN=Txndc17 PE=2 SV=1                                                          |
| BOK031_RAT | 60S ribosomal protein L7 GN=Rpl7 PE=2 SV=1                                                    |
| B1H227_RAT | LOC682908 protein GN=Rcc1 PE=2 SV=1                                                           |
| B1H282_RAT | Glycosyltransferase 25 domain containing 1 GN=Colgalt1 PE=2 SV=1                              |
| B1H298_RAT | Nup62cl protein (Fragment) GN=Nup62cl PE=2 SV=1                                               |
| B1H2A6_RAT | Fxr2 protein GN=Fxr2 PE=2 SV=1                                                                |
| B1PLB1_RAT | CD34 antigen (Predicted) GN=Cd34 PE=2 SV=1                                                    |
| B1WBN3_RAT | 2-oxoisovalerate dehydrogenase subunit alpha, mitochondrial GN=Bckdha PE=1 SV=1               |
| B1WBS4_RAT | Protein Vps26b GN=Vps26b PE=2 SV=1                                                            |
| B1WBY5_RAT | DnaJ (Hsp40) homolog, subfamily C, member 11 GN=Dnajc11 PE=2 SV=1                             |
| B1WC02_RAT | CTP synthase GN=Ctps1 PE=2 SV=1                                                               |
| B1WC34_RAT | Protein Prkcsh GN=Prkcsh PE=2 SV=1                                                            |
| B1WC49_RAT | Api5 protein GN=Api5 PE=2 SV=1                                                                |
| B1WC50_RAT | Ewsr1 protein GN=Ewsr1 PE=2 SV=1                                                              |
| B1WC56_RAT | Nola2 protein GN=LOC100910210 PE=2 SV=1                                                       |
| B1WC61_RAT | Acad9 protein GN=Acad9 PE=2 SV=1                                                              |
| B1WC67_RAT | Protein Slc25a24 GN=Slc25a24 PE=2 SV=1                                                        |
| B1WC84_RAT | Canopy 4 homolog (Zebrafish) GN=Cnpy4 PE=2 SV=1                                               |
| B2GUV5_RAT | ATPase, H transporting, lysosomal V1 subunit G1 GN=Atp6v1g1 PE=4 SV=1                         |
| B2GUV9_RAT | Protein Exoc3l4 GN=Exoc3l4 PE=2 SV=1                                                          |
| B2GUY8_RAT | Protein Slc25a17 GN=Slc25a17 PE=2 SV=1                                                        |
| B2GUZ3_RAT | Mthfd1l protein GN=Mthfd1l PE=2 SV=1                                                          |
| B2GUZ9_RAT | Fam49b protein GN=Fam49b PE=2 SV=1                                                            |
| B2GV09_RAT | Llg1 protein GN=Llg1 PE=2 SV=1                                                                |
| B2GV15_RAT | Dihydrolipoamide branched chain transacylase E2 GN=Dbt PE=2 SV=1                              |
| B2GV73_RAT | Actin related protein 2/3 complex, subunit 3 GN=Arpc3 PE=2 SV=1                               |
| B2GV94_RAT | Fam134c protein GN=Fam134c PE=2 SV=1                                                          |

|            |                                                                                                |
|------------|------------------------------------------------------------------------------------------------|
| B2GVB9_RAT | Fermt3 protein GN=Fermt3 PE=2 SV=1                                                             |
| B2RYB3_RAT | Protein Srrm1 GN=Srrm1 PE=2 SV=1                                                               |
| B2RYC4_RAT | Protein Syvn1 GN=LOC100910831 PE=2 SV=1                                                        |
| B2RYC9_RAT | Gba protein GN=Gba PE=2 SV=1                                                                   |
| B2RYD7_RAT | Protein Stt3b GN=Stt3b PE=2 SV=1                                                               |
| B2RYF6_RAT | Cleft lip and palate associated transmembrane protein 1 GN=Ciptm1 PE=2 SV=1                    |
| B2RYI2_RAT | Signal recognition particle subunit SRP68 GN=Srp68 PE=2 SV=1                                   |
| B2RYM3_RAT | Inter-alpha trypsin inhibitor, heavy chain 1 (Predicted), isoform CRA_a GN=Itih1 PE=2 SV=1     |
| B2RYN3_RAT | Eukaryotic translation elongation factor 1 epsilon 1 GN=Eef1e1 PE=2 SV=1                       |
| B2RYP4_RAT | Protein Snx2 GN=Snx2 PE=2 SV=1                                                                 |
| B2RYP6_RAT | LUC7-like 2 (S. cerevisiae) GN=Luc7l2 PE=2 SV=1                                                |
| B2RYS2_RAT | Cytochrome b-c1 complex subunit 7 GN=LOC685596 PE=3 SV=1                                       |
| B2RYW7_RAT | Protein Srp14 GN=Srp14 PE=4 SV=1                                                               |
| B2RZ27_RAT | Protein Sh3bgrl3 GN=Sh3bgrl3 PE=4 SV=1                                                         |
| B2RZ66_RAT | Protein Srp19 GN=Srp19 PE=2 SV=1                                                               |
| B2RZ72_RAT | Actin related protein 2/3 complex, subunit 4 (Predicted), isoform CRA_a GN=Arpc4 PE=2 SV=1     |
| B2RZ74_RAT | Protein Snrnp70 GN=Snrnp70 PE=2 SV=1                                                           |
| B2RZA9_RAT | Protein Ube2l3 GN=Ube2l3 PE=2 SV=1                                                             |
| B2RZB6_RAT | LSM8 homolog, U6 small nuclear RNA associated (S. cerevisiae) GN=Naa38 PE=4 SV=1               |
| B2RZB7_RAT | Protein Snrpd1 GN=Snrpd1 PE=4 SV=1                                                             |
| B2RZD1_RAT | Protein Sec61b GN=Sec61b PE=4 SV=1                                                             |
| B2RZD4_RAT | 60S ribosomal protein L34 GN=Rpl34 PE=4 SV=1                                                   |
| B2RZD5_RAT | Protein LOC688712 GN=Rpl22l1 PE=2 SV=1                                                         |
| B2RZD6_RAT | Ndufa4 protein GN=Ndufa4 PE=4 SV=1                                                             |
| B3A2_RAT   | Anion exchange protein 2 GN=Slc4a2 PE=2 SV=1                                                   |
| B3DMA1_RAT | Atxn2l protein GN=Atxn2l PE=2 SV=1                                                             |
| B4F7A5_RAT | Cd99 protein GN=Cd99 PE=2 SV=1                                                                 |
| B4F7C9_RAT | Protein Stt3a GN=Stt3a PE=2 SV=1                                                               |
| B4F7E7_RAT | Membrane protein, palmitoylated 5 (MAGUK p55 subfamily member 5) GN=Mpp5 PE=2 SV=1             |
| B4F7F3_RAT | Arvcf protein GN=Arvcf PE=2 SV=1                                                               |
| B5DEG8_RAT | LOC685144 protein GN=Sec24c PE=2 SV=1                                                          |
| B5DEK0_RAT | Protein Rprd1b GN=Rprd1b PE=2 SV=1                                                             |
| B5DEL7_RAT | Protein LOC100361694 GN=Sec61g PE=3 SV=1                                                       |
| B5DEL8_RAT | NADH dehydrogenase (Ubiquinone) Fe-S protein 5 GN=LOC100361505 PE=4 SV=1                       |
| B5DEN5_RAT | Eukaryotic translation elongation factor 1 beta 2 GN=Eef1b2 PE=1 SV=1                          |
| B5DEQ4_RAT | Protein Snrpb2 GN=Snrpb2 PE=2 SV=1                                                             |
| B5DES0_RAT | Protein Snrpd2 GN=Snrpd2 PE=4 SV=1                                                             |
| B5DEY8_RAT | Protein Snx6 GN=Snx6 PE=2 SV=1                                                                 |
| B5DEZ8_RAT | Plexin domain containing 2 GN=Plxdc2 PE=2 SV=1                                                 |
| B5DF05_RAT | Protein Rasip1 GN=Rasip1 PE=2 SV=1                                                             |
| B5DF46_RAT | Phosphomannomutase GN=Pmm2 PE=2 SV=1                                                           |
| B5DF55_RAT | Protein Stam GN=Stam PE=2 SV=1                                                                 |
| B5DF57_RAT | Erythrocyte protein band 4.2 GN=Epb42 PE=2 SV=1                                                |
| B5DF65_RAT | Biliverdin reductase B (Flavin reductase (NADPH)) GN=LOC681468 PE=2 SV=1                       |
| B5DF91_RAT | ELAV (Embryonic lethal, abnormal vision, Drosophila)-like 1 (Hu antigen R) GN=Elavl1 PE=2 SV=1 |
| B5DFC3_RAT | Protein Sec23a GN=Sec23a PE=2 SV=1                                                             |
| B5DFI3_RAT | Adaptor protein complex AP-1, sigma 1 (Predicted), isoform CRA_b GN=Ap1s1 PE=2 SV=1            |
| B5DFI9_RAT | Pdk3 protein GN=Pdk3 PE=2 SV=1                                                                 |
| B5DFK6_RAT | Adaptor-related protein complex 3, delta 1 subunit, isoform CRA_b GN=Ap3d1 PE=2 SV=1           |
| BAG5_RAT   | BAG family molecular chaperone regulator 5 GN=Bag5 PE=1 SV=1                                   |
| BASP1_RAT  | Brain acid soluble protein 1 GN=Basp1 PE=1 SV=2                                                |
| BCAM_RAT   | Basal cell adhesion molecule GN=Bcam PE=2 SV=1                                                 |
| BCAT2_RAT  | Branched-chain-amino-acid aminotransferase, mitochondrial GN=Bcat2 PE=1 SV=1                   |
| BDH_RAT    | D-beta-hydroxybutyrate dehydrogenase, mitochondrial GN=Bdh1 PE=1 SV=2                          |
| BIG1_RAT   | Brefeldin A-inhibited guanine nucleotide-exchange protein 1 GN=Arfggef1 PE=1 SV=1              |
| BIN2_RAT   | Bridging integrator 2 GN=Bin2 PE=1 SV=1                                                        |
| BUD31_RAT  | Protein BUD31 homolog GN=Bud31 PE=2 SV=2                                                       |
| BZW1_RAT   | Basic leucine zipper and W2 domain-containing protein 1 GN=Bzw1 PE=2 SV=1                      |
| COJPT7_RAT | Filamin alpha GN=Flna PE=2 SV=1                                                                |
| C1QBP_RAT  | Complement component 1 Q subcomponent-binding protein, mitochondrial GN=C1qbp PE=1 SV=2        |
| C1QR1_RAT  | Complement component C1q receptor GN=Cd93 PE=2 SV=1                                            |

|           |                                                                                                    |
|-----------|----------------------------------------------------------------------------------------------------|
| C4BPA_RAT | C4b-binding protein alpha chain GN=C4bpa PE=2 SV=1                                                 |
| CADH1_RAT | Cadherin-1 GN=Cdh1 PE=1 SV=1                                                                       |
| CAH1_RAT  | Carbonic anhydrase 1 GN=Ca1 PE=1 SV=1                                                              |
| CAH2_RAT  | Carbonic anhydrase 2 GN=Ca2 PE=1 SV=2                                                              |
| CAH4_RAT  | Carbonic anhydrase 4 GN=Ca4 PE=1 SV=1                                                              |
| CALD1_RAT | Non-muscle caldesmon GN=Cald1 PE=1 SV=1                                                            |
| CALM_RAT  | Calmodulin GN=Calm1 PE=1 SV=2                                                                      |
| CALR_RAT  | Calreticulin GN=Calr PE=1 SV=1                                                                     |
| CALX_RAT  | Calnexin GN=Canx PE=1 SV=1                                                                         |
| CAN1_RAT  | Calpain-1 catalytic subunit GN=Capn1 PE=1 SV=1                                                     |
| CAN2_RAT  | Calpain-2 catalytic subunit GN=Capn2 PE=1 SV=3                                                     |
| CAND1_RAT | Cullin-associated NEDD8-dissociated protein 1 GN=Cand1 PE=1 SV=1                                   |
| CANT1_RAT | Soluble calcium-activated nucleotidase 1 GN=Cant1 PE=1 SV=1                                        |
| CAP1_RAT  | Adenylyl cyclase-associated protein 1 GN=Cap1 PE=1 SV=3                                            |
| CAPG_RAT  | Macrophage-capping protein GN=Capg PE=1 SV=1                                                       |
| CAPR1_RAT | Caprin-1 GN=Caprin1 PE=1 SV=2                                                                      |
| CAPZB_RAT | F-actin-capping protein subunit beta GN=Capzb PE=1 SV=1                                            |
| CATA_RAT  | Catalase GN=Cat PE=1 SV=3                                                                          |
| CATC_RAT  | Dipeptidyl peptidase 1 GN=Ctsc PE=1 SV=3                                                           |
| CATD_RAT  | Cathepsin D GN=Ctsd PE=1 SV=1                                                                      |
| CATJ_RAT  | Cathepsin J GN=Ctsj PE=2 SV=2                                                                      |
| CATL1_RAT | Cathepsin L1 GN=Ctsl PE=1 SV=2                                                                     |
| CATQ_RAT  | Cathepsin Q GN=Ctsq PE=2 SV=1                                                                      |
| CATZ_RAT  | Cathepsin Z GN=Ctsz PE=1 SV=2                                                                      |
| CAZA1_RAT | F-actin-capping protein subunit alpha-1 GN=Capza1 PE=1 SV=1                                        |
| CAZA2_RAT | F-actin-capping protein subunit alpha-2 GN=Capza2 PE=1 SV=1                                        |
| CBG_RAT   | Corticosteroid-binding globulin GN=Serpina6 PE=1 SV=2                                              |
| CBPB2_RAT | Carboxypeptidase B2 GN=Cpb2 PE=2 SV=1                                                              |
| CBPN_RAT  | Carboxypeptidase N catalytic chain GN=Cpn1 PE=2 SV=1                                               |
| CBPQ_RAT  | Carboxypeptidase Q GN=Cpq PE=1 SV=1                                                                |
| CBR1_RAT  | Carbonyl reductase [NADPH] 1 GN=Cbr1 PE=1 SV=2                                                     |
| CC50A_RAT | Cell cycle control protein 50A GN=Tmem30a PE=2 SV=1                                                |
| CCD47_RAT | Coiled-coil domain-containing protein 47 GN=Ccdc47 PE=2 SV=1                                       |
| CCD51_RAT | Coiled-coil domain-containing protein 51 GN=Ccdc51 PE=2 SV=2                                       |
| CD151_RAT | CD151 antigen GN=Cd151 PE=1 SV=2                                                                   |
| CD36_RAT  | Platelet glycoprotein 4 GN=Cd36 PE=1 SV=3                                                          |
| CD59_RAT  | CD59 glycoprotein GN=Cd59 PE=1 SV=2                                                                |
| CD63_RAT  | CD63 antigen GN=Cd63 PE=1 SV=2                                                                     |
| CD82_RAT  | CD82 antigen GN=Cd82 PE=1 SV=1                                                                     |
| CD9_RAT   | CD9 antigen GN=Cd9 PE=1 SV=2                                                                       |
| CDC37_RAT | Hsp90 co-chaperone Cdc37 GN=Cdc37 PE=1 SV=2                                                        |
| CDC5L_RAT | Cell division cycle 5-like protein GN=Cdc5l PE=1 SV=2                                              |
| CDIPT_RAT | CDP-diacylglycerol--inositol 3-phosphatidyltransferase GN=Cdipt PE=1 SV=1                          |
| CDS2_RAT  | Phosphatidate cytidylyltransferase 2 GN=Cds2 PE=2 SV=1                                             |
| CDV3_RAT  | Protein CDV3 homolog GN=Cdv3 PE=2 SV=1                                                             |
| CEAM3_RAT | Carcinoembryonic antigen-related cell adhesion molecule 3 GN=Ceacam3 PE=2 SV=1                     |
| CELF1_RAT | CUGBP Elav-like family member 1 GN=Celf1 PE=2 SV=1                                                 |
| CES1D_RAT | Carboxylesterase 1D GN=Ces1d PE=1 SV=2                                                             |
| CH10_RAT  | 10 kDa heat shock protein, mitochondrial GN=Hspe1 PE=1 SV=3                                        |
| CH60_RAT  | 60 kDa heat shock protein, mitochondrial GN=Hspd1 PE=1 SV=1                                        |
| CHCH6_RAT | Coiled-coil-helix-coiled-coil-helix domain-containing protein 6, mitochondrial GN=Chchd6 PE=3 SV=1 |
| CHDH_RAT  | Choline dehydrogenase, mitochondrial GN=Chdh PE=1 SV=1                                             |
| CHID1_RAT | Chitinase domain-containing protein 1 GN=Chid1 PE=2 SV=2                                           |
| CHP1_RAT  | Calcineurin B homologous protein 1 GN=Chp1 PE=1 SV=2                                               |
| CHSP1_RAT | Calcium-regulated heat stable protein 1 GN=Carhsp1 PE=1 SV=1                                       |
| CIRBP_RAT | Cold-inducible RNA-binding protein GN=Cirbp PE=2 SV=1                                              |
| CISD1_RAT | CDGSH iron-sulfur domain-containing protein 1 GN=Cisd1 PE=3 SV=1                                   |
| CK5P3_RAT | CDK5 regulatory subunit-associated protein 3 GN=Cdk5rap3 PE=1 SV=1                                 |
| CLIC1_RAT | Chloride intracellular channel protein 1 GN=Clic1 PE=1 SV=1                                        |
| CLIC5_RAT | Chloride intracellular channel protein 5 GN=Clic5 PE=1 SV=1                                        |
| CLN8_RAT  | Protein CLN8 GN=Cln8 PE=2 SV=1                                                                     |

|           |                                                                               |
|-----------|-------------------------------------------------------------------------------|
| CLUS_RAT  | Clusterin GN=Clu PE=1 SV=2                                                    |
| CNBP_RAT  | Cellular nucleic acid-binding protein GN=Cnbp PE=2 SV=1                       |
| CNDP2_RAT | Cytosolic non-specific dipeptidase GN=Cndp2 PE=1 SV=1                         |
| CNN3_RAT  | Calponin-3 GN=Cnn3 PE=1 SV=1                                                  |
| CNNM4_RAT | Metal transporter CNNM4 GN=Cnnm4 PE=1 SV=1                                    |
| CO1A1_RAT | Collagen alpha-1(I) chain GN=Col1a1 PE=1 SV=5                                 |
| CO1A2_RAT | Collagen alpha-2(I) chain GN=Col1a2 PE=1 SV=3                                 |
| CO3A1_RAT | Collagen alpha-1(III) chain GN=Col3a1 PE=2 SV=3                               |
| CO4_RAT   | Complement C4 GN=C4 PE=1 SV=3                                                 |
| CO6_RAT   | Complement component C6 GN=C6 PE=2 SV=1                                       |
| CO8B_RAT  | Complement component C8 beta chain GN=C8b PE=2 SV=2                           |
| COF1_RAT  | Cofilin-1 GN=Cfl1 PE=1 SV=3                                                   |
| COL12_RAT | Collectin-12 GN=Colec12 PE=2 SV=1                                             |
| COPB2_RAT | Coatomer subunit beta' GN=Copb2 PE=1 SV=3                                     |
| COPB_RAT  | Coatomer subunit beta GN=Copb1 PE=1 SV=1                                      |
| COPD_RAT  | Coatomer subunit delta GN=Arcn1 PE=2 SV=1                                     |
| COPG1_RAT | Coatomer subunit gamma-1 GN=Copg1 PE=2 SV=1                                   |
| COPG2_RAT | Coatomer subunit gamma-2 GN=Copg2 PE=3 SV=2                                   |
| COR1A_RAT | Coronin-1A GN=Coro1a PE=1 SV=3                                                |
| COTL1_RAT | Coactosin-like protein GN=Cotl1 PE=1 SV=1                                     |
| COX1_RAT  | Cytochrome c oxidase subunit 1 GN=Mtco1 PE=2 SV=2                             |
| COX41_RAT | Cytochrome c oxidase subunit 4 isoform 1, mitochondrial GN=Cox4i1 PE=1 SV=1   |
| COX5A_RAT | Cytochrome c oxidase subunit 5A, mitochondrial GN=Cox5a PE=1 SV=1             |
| COX5B_RAT | Cytochrome c oxidase subunit 5B, mitochondrial GN=Cox5b PE=1 SV=2             |
| COX7C_RAT | Cytochrome c oxidase subunit 7C, mitochondrial GN=Cox7c PE=1 SV=2             |
| CP11A_RAT | Cholesterol side-chain cleavage enzyme, mitochondrial GN=Cyp11a1 PE=2 SV=1    |
| CP51A_RAT | Lanosterol 14-alpha demethylase GN=Cyp51a1 PE=2 SV=1                          |
| CPNS1_RAT | Calpain small subunit 1 GN=Capns1 PE=1 SV=3                                   |
| CPSF5_RAT | Cleavage and polyadenylation specificity factor subunit 5 GN=Nudt21 PE=2 SV=1 |
| CPT2_RAT  | Carnitine O-palmitoyltransferase 2, mitochondrial GN=Cpt2 PE=1 SV=1           |
| CQ062_RAT | Uncharacterized protein C17orf62 homolog PE=2 SV=1                            |
| CR032_RAT | UPF0729 protein C18orf32 homolog PE=3 SV=1                                    |
| CREL1_RAT | Cysteine-rich with EGF-like domain protein 1 GN=Crel1 PE=2 SV=1               |
| CREL2_RAT | Cysteine-rich with EGF-like domain protein 2 GN=Crel2 PE=1 SV=1               |
| CRKL_RAT  | Crk-like protein GN=Crkl PE=1 SV=1                                            |
| CRP_RAT   | C-reactive protein GN=Crp PE=1 SV=1                                           |
| CRYAB_RAT | Alpha-crystallin B chain GN=Cryab PE=1 SV=1                                   |
| CSDE1_RAT | Cold shock domain-containing protein E1 GN=Csde1 PE=2 SV=1                    |
| CSK21_RAT | Casein kinase II subunit alpha GN=Csnk2a1 PE=1 SV=2                           |
| CSK2B_RAT | Casein kinase II subunit beta GN=Csnk2b PE=1 SV=1                             |
| CSN1_RAT  | COP9 signalosome complex subunit 1 GN=Gps1 PE=1 SV=1                          |
| CSN4_RAT  | COP9 signalosome complex subunit 4 GN=Cops4 PE=1 SV=1                         |
| CSPG4_RAT | Chondroitin sulfate proteoglycan 4 GN=Cspg4 PE=1 SV=2                         |
| CSRP1_RAT | Cysteine and glycine-rich protein 1 GN=Csrp1 PE=2 SV=2                        |
| CTBP1_RAT | C-terminal-binding protein 1 GN=Ctbp1 PE=1 SV=3                               |
| CTGF_RAT  | Connective tissue growth factor GN=Ctgf PE=2 SV=1                             |
| CTL2_RAT  | Choline transporter-like protein 2 GN=Slc44a2 PE=2 SV=1                       |
| CTNB1_RAT | Catenin beta-1 GN=Ctnnb1 PE=1 SV=1                                            |
| CTR1_RAT  | High affinity cationic amino acid transporter 1 GN=Slc7a1 PE=2 SV=1           |
| CUBN_RAT  | Cubilin GN=Cubn PE=1 SV=2                                                     |
| CUL3_RAT  | Cullin-3 GN=Cul3 PE=1 SV=2                                                    |
| CUL7_RAT  | Cullin-7 GN=Cul7 PE=1 SV=1                                                    |
| CX6C2_RAT | Cytochrome c oxidase subunit 6C-2 GN=Cox6c2 PE=1 SV=3                         |
| CX7A2_RAT | Cytochrome c oxidase subunit 7A2, mitochondrial GN=Cox7a2 PE=1 SV=1           |
| CXA1_RAT  | Gap junction alpha-1 protein GN=Gja1 PE=1 SV=2                                |
| CXB2_RAT  | Gap junction beta-2 protein GN=Gjb2 PE=1 SV=1                                 |
| CYB5B_RAT | Cytochrome b5 type B GN=Cyb5b PE=1 SV=2                                       |
| CYC_RAT   | Cytochrome c, somatic GN=Cycc PE=1 SV=2                                       |
| CYR61_RAT | Protein CYR61 GN=Cyr61 PE=2 SV=1                                              |
| CYTB_RAT  | Cystatin-B GN=Cstb PE=1 SV=1                                                  |
| CYTC_RAT  | Cystatin-C GN=Cst3 PE=1 SV=2                                                  |

|            |                                                                                                                |
|------------|----------------------------------------------------------------------------------------------------------------|
| D3Z8B2_RAT | Protein Nup133 (Fragment) GN=Nup133 PE=4 SV=2                                                                  |
| D3Z8K0_RAT | PDZ domain containing 11 (Predicted), isoform CRA_a GN=Pdzd11 PE=4 SV=1                                        |
| D3Z8R4_RAT | Protein RGD1565486 GN=Rbm2511 PE=4 SV=2                                                                        |
| D3Z900_RAT | Mitochondrial amidoxime reducing component 2 GN=Marc2 PE=4 SV=2                                                |
| D3Z941_RAT | Protein Mars GN=Mars PE=3 SV=1                                                                                 |
| D3Z9E1_RAT | Elastin microfibril interfacier 1 (Predicted), isoform CRA_b GN=Emilin1 PE=4 SV=1                              |
| D3Z9E6_RAT | Cleavage and polyadenylation specific factor 2 (Predicted) GN=Cpsf2 PE=4 SV=1                                  |
| D3Z9F8_RAT | Collagen alpha-1(XII) chain GN=Col12a1 PE=4 SV=2                                                               |
| D3Z9Z0_RAT | Ankyrin 1, erythroid GN=Ank1 PE=4 SV=1                                                                         |
| D3ZA85_RAT | Histone cell cycle regulation defective interacting protein 5 (Predicted), isoform CRA_a GN=Nfu1 PE=4 SV=1     |
| D3ZACO_RAT | Protein Itga2b GN=Itga2b PE=3 SV=2                                                                             |
| D3ZAE5_RAT | ATPase, Ca++ transporting, plasma membrane 1, isoform CRA_b GN=Atp2b1 PE=3 SV=1                                |
| D3ZAF5_RAT | Periostin, osteoblast specific factor (Predicted), isoform CRA_a GN=Postn PE=1 SV=1                            |
| D3ZAH8_RAT | Unconventional myosin-IXb GN=Myo9b PE=4 SV=2                                                                   |
| D3ZAI0_RAT | Protein U2surp GN=U2surp PE=4 SV=1                                                                             |
| D3ZAL7_RAT | Protein Gab1 GN=Gab1 PE=4 SV=2                                                                                 |
| D3ZAN3_RAT | Alpha glucosidase 2 alpha neutral subunit (Predicted) GN=Ganab PE=1 SV=1                                       |
| D3ZAS9_RAT | Protein Ddrk1 GN=Ddrk1 PE=4 SV=1                                                                               |
| D3ZAX3_RAT | Plasma membrane calcium-transporting ATPase 1 GN=Atp2b1 PE=3 SV=1                                              |
| D3ZAY8_RAT | Protein Pnn GN=Pnn PE=4 SV=1                                                                                   |
| D3ZAZ0_RAT | Eukaryotic translation initiation factor 3 subunit M GN=Eif3m PE=3 SV=1                                        |
| D3ZB30_RAT | Polypyrimidine tract binding protein 1, isoform CRA_c GN=Ptbp1 PE=4 SV=1                                       |
| D3ZBC7_RAT | Protein RGD1305508 (Fragment) GN=RGD1305508 PE=4 SV=2                                                          |
| D3ZBE1_RAT | Protein LOC292543 GN=LOC292543 PE=4 SV=2                                                                       |
| D3ZBL6_RAT | Protein Nup160 GN=Nup160 PE=4 SV=2                                                                             |
| D3ZBS2_RAT | Inter-alpha-trypsin inhibitor heavy chain H3 GN=Itih3 PE=4 SV=2                                                |
| D3ZC56_RAT | Protein Dst (Fragment) GN=Dst PE=1 SV=2                                                                        |
| D3ZC63_RAT | Protein Cmpk2 GN=Cmpk2 PE=4 SV=2                                                                               |
| D3ZC84_RAT | Ubiquitin carboxyl-terminal hydrolase GN=Usp9x PE=3 SV=1                                                       |
| D3ZCD4_RAT | Phosphatidylinositol transfer protein beta isoform (Fragment) GN=Pitpnb PE=4 SV=2                              |
| D3ZCG9_RAT | Integrin alpha 3 variant A GN=Itga3 PE=2 SV=1                                                                  |
| D3ZCQ2_RAT | Protein Alg11 GN=Alg11 PE=4 SV=1                                                                               |
| D3ZCT7_RAT | SEC23B (S. cerevisiae) (Predicted), isoform CRA_b GN=Sec23b PE=4 SV=1                                          |
| D3ZCW5_RAT | Asparagine-linked glycosylation 9 homolog (Yeast, alpha 1,2 mannosyltransferase) (Predicted) GN=Alg9 PE=4 SV=1 |
| D3ZCZ9_RAT | Protein LOC100912599 GN=LOC100912599 PE=4 SV=1                                                                 |
| D3ZD09_RAT | Cytochrome c oxidase subunit 6B1 GN=Cox6b1 PE=4 SV=1                                                           |
| D3ZD11_RAT | Protein Spcs2 GN=Spcs2 PE=4 SV=1                                                                               |
| D3ZD23_RAT | ATP-binding cassette, sub-family E (OABP), member 1 GN=Abce1 PE=3 SV=1                                         |
| D3ZD31_RAT | Mannose receptor, C type 1 (Predicted) GN=Mrc1 PE=4 SV=2                                                       |
| D3ZD73_RAT | Protein Ddx6 GN=Ddx6 PE=3 SV=1                                                                                 |
| D3ZD97_RAT | DEAH (Asp-Glu-Ala-His) box polypeptide 15 (Predicted), isoform CRA_b GN=Dhx15 PE=4 SV=1                        |
| D3ZDF0_RAT | Neuroplastin GN=Nptn PE=4 SV=2                                                                                 |
| D3ZDX5_RAT | Protein Plxnb1 GN=Plxnb1 PE=4 SV=1                                                                             |
| D3ZE15_RAT | Protein LOC100911483 GN=LOC100911483 PE=4 SV=1                                                                 |
| D3ZE30_RAT | Breast cancer anti-estrogen resistance protein 1 GN=Bcar1 PE=4 SV=1                                            |
| D3ZE72_RAT | Methionine aminopeptidase 1 GN=Metap1 PE=3 SV=1                                                                |
| D3ZEA0_RAT | Fibronectin type III domain containing 3a (Predicted), isoform CRA_a GN=Fndc3a PE=4 SV=2                       |
| D3ZF11_RAT | Hepatitis B virus x interacting protein (Predicted), isoform CRA_a GN=Lamtor5 PE=4 SV=1                        |
| D3ZF12_RAT | Signal peptidase complex subunit 3 GN=Spcs3 PE=4 SV=1                                                          |
| D3ZF13_RAT | Acyl carrier protein GN=LOC683884 PE=3 SV=1                                                                    |
| D3ZF45_RAT | Protein Larp4b GN=Larp4b PE=4 SV=2                                                                             |
| D3ZF54_RAT | Anoctamin GN=Ano10 PE=3 SV=1                                                                                   |
| D3ZF97_RAT | Protein Erlec1 GN=Erlec1 PE=4 SV=2                                                                             |
| D3ZFA8_RAT | Protein LOC100362366 GN=LOC100364909 PE=3 SV=1                                                                 |
| D3ZFB2_RAT | Protein Luc7l3 GN=Luc7l3 PE=4 SV=1                                                                             |
| D3ZFD0_RAT | Uncharacterized protein GN=Myo18a PE=1 SV=2                                                                    |
| D3ZFD2_RAT | Protein Galnt2 GN=Galnt2 PE=3 SV=1                                                                             |
| D3ZFH5_RAT | Protein Itih2 GN=Itih2 PE=4 SV=2                                                                               |
| D3ZFJ6_RAT | Lactamase, beta (Predicted) GN=Lactb PE=4 SV=1                                                                 |
| D3ZFK5_RAT | Protein Spcs1 GN=Spcs1 PE=4 SV=2                                                                               |
| D3ZG43_RAT | NADH dehydrogenase (Ubiquinone) Fe-S protein 3 (Predicted), isoform CRA_c GN=Ndufs3 PE=3 SV=1                  |

|            |                                                                                                                                 |
|------------|---------------------------------------------------------------------------------------------------------------------------------|
| D3ZG48_RAT | Protein Ddx50 GN=Ddx50 PE=4 SV=1                                                                                                |
| D3ZGE2_RAT | Myeloperoxidase (Mapped) GN=Mpo PE=4 SV=1                                                                                       |
| D3ZGK7_RAT | Carboxylesterase 1C GN=Ces1c PE=4 SV=2                                                                                          |
| D3ZGS5_RAT | Protein Uaca GN=Uaca PE=4 SV=2                                                                                                  |
| D3ZGT6_RAT | Procollagen-proline, 2-oxoglutarate 4-dioxygenase (Proline 4-hydroxylase), alpha II polypeptide (Predicted), isoform CRA_a GN=P |
| D3ZGV2_RAT | Protein Pex16 GN=Pex16 PE=4 SV=2                                                                                                |
| D3ZGX7_RAT | Protein LYRIC GN=Mtdh PE=2 SV=1                                                                                                 |
| D3ZH34_RAT | Protein Fam46a GN=Fam46a PE=4 SV=1                                                                                              |
| D3ZH41_RAT | Cytoskeleton-associated protein 4 (Predicted) GN=Ckap4 PE=4 SV=2                                                                |
| D3ZHA0_RAT | Protein Flnc GN=Flnc PE=4 SV=1                                                                                                  |
| D3ZHG3_RAT | Protein Ptk7 GN=Ptk7 PE=4 SV=2                                                                                                  |
| D3ZHI1_RAT | Protein LOC100912115 GN=LOC100912115 PE=4 SV=2                                                                                  |
| D3ZHJ6_RAT | Sarcoplasmic/endoplasmic reticulum calcium ATPase 3 GN=Atp2a3 PE=3 SV=2                                                         |
| D3ZHK8_RAT | Protein Cpeb2 GN=Cpeb2 PE=4 SV=2                                                                                                |
| D3ZHR2_RAT | ATP-binding cassette, sub-family D (ALD), member 1 (Predicted) GN=Abcd1 PE=3 SV=1                                               |
| D3ZH23_RAT | Oxysterol-binding protein GN=Osbp13 PE=3 SV=1                                                                                   |
| D3ZI34_RAT | Protein Ifnk GN=Ifnk PE=3 SV=1                                                                                                  |
| D3ZI99_RAT | PRP3 pre-mRNA processing factor 3 homolog (Yeast) (Predicted), isoform CRA_a GN=Prpf3 PE=4 SV=1                                 |
| D3ZIF5_RAT | Adaptor-related protein complex 3, beta 1 subunit (Predicted), isoform CRA_b GN=Ap3b1 PE=4 SV=1                                 |
| D3ZIJ5_RAT | Protein LOC100910177 GN=Dpm3 PE=4 SV=1                                                                                          |
| D3ZIL6_RAT | Enoyl Coenzyme A hydratase domain containing 2 (Predicted), isoform CRA_a GN=Echdc2 PE=3 SV=1                                   |
| D3ZIP3_RAT | Protein Epb4.1 GN=Epb4.1 PE=4 SV=1                                                                                              |
| D3ZIP8_RAT | Protein Endod1 GN=Endod1 PE=4 SV=1                                                                                              |
| D3ZIY3_RAT | Protein Ythdf3 GN=Ythdf3 PE=4 SV=1                                                                                              |
| D3ZJ08_RAT | Histone H3 GN=Hist2h3c2 PE=1 SV=1                                                                                               |
| D3ZJ25_RAT | Protein Slc1a5 GN=Slc1a5 PE=4 SV=2                                                                                              |
| D3ZJ32_RAT | Protein Esyt2 GN=Esyt2 PE=4 SV=2                                                                                                |
| D3ZJ50_RAT | Plakophilin 3 (Predicted), isoform CRA_a GN=Pkp3 PE=4 SV=1                                                                      |
| D3ZJ67_RAT | Protein Sun2 GN=Sun2 PE=4 SV=1                                                                                                  |
| D3ZJ86_RAT | Sodium/hydrogen exchanger GN=Slc9a6 PE=3 SV=1                                                                                   |
| D3ZJ92_RAT | Pre-mRNA processing factor 40 homolog A (Yeast) (Predicted) GN=Prpf40a PE=4 SV=1                                                |
| D3ZJA9_RAT | Protein Slc27a3 GN=Slc27a3 PE=4 SV=1                                                                                            |
| D3ZJF9_RAT | Protein Gla GN=Gla PE=4 SV=2                                                                                                    |
| D3ZJR1_RAT | Epidermal growth factor receptor pathway substrate 15-like 1 GN=Eps15l1 PE=2 SV=2                                               |
| D3ZJR7_RAT | Protein Dsc2 (Fragment) GN=Dsc2 PE=3 SV=2                                                                                       |
| D3ZJW3_RAT | PTPRF interacting protein, binding protein 1 (Liprin beta 1) (Predicted) GN=Ppfibp1 PE=4 SV=1                                   |
| D3ZJX5_RAT | Protein LOC687295 GN=LOC687295 PE=4 SV=2                                                                                        |
| D3ZK45_RAT | Band 4.1-like protein 5 GN=Epb4.1l5 PE=4 SV=2                                                                                   |
| D3ZK56_RAT | Protein Rap2c GN=Rap2c PE=4 SV=2                                                                                                |
| D3ZK98_RAT | Yorkie homolog GN=Yap1 PE=1 SV=2                                                                                                |
| D3ZKE6_RAT | Sarcolemma associated protein (Predicted) GN=Slmap PE=4 SV=1                                                                    |
| D3ZKG1_RAT | Protein Mut GN=Mut PE=4 SV=1                                                                                                    |
| D3ZKG5_RAT | Protein Parvb GN=Parvb PE=4 SV=1                                                                                                |
| D3ZL24_RAT | Calpastatin GN=Cast PE=2 SV=1                                                                                                   |
| D3ZLA3_RAT | Copine 3 protein GN=Cpne3 PE=2 SV=1                                                                                             |
| D3ZLC1_RAT | Protein Lmnb2 GN=Lmnb2 PE=4 SV=1                                                                                                |
| D3ZLD5_RAT | Protein Golga3 GN=Golga3 PE=4 SV=1                                                                                              |
| D3ZLE2_RAT | Protein Tmcc3 GN=Tmcc3 PE=4 SV=1                                                                                                |
| D3ZLK9_RAT | ATP-dependent (S)-NAD(P)H-hydrate dehydratase GN=Carkd PE=3 SV=1                                                                |
| D3ZLT1_RAT | NADH dehydrogenase (Ubiquinone) 1 beta subcomplex, 7 (Predicted) GN=Ndufb7 PE=4 SV=1                                            |
| D3ZM21_RAT | Catechol-O-methyltransferase domain containing 1 (Predicted), isoform CRA_a GN=Comtd1 PE=4 SV=1                                 |
| D3ZM69_RAT | Protein Epb41l2 GN=Epb41l2 PE=4 SV=1                                                                                            |
| D3ZMI6_RAT | Olfactomedin 4 (Predicted) GN=Olfm4 PE=4 SV=1                                                                                   |
| D3ZMS1_RAT | Protein Sf3b2 GN=Sf3b2 PE=4 SV=2                                                                                                |
| D3ZN01_RAT | Protein RGD1307830 GN=RGD1307830 PE=4 SV=1                                                                                      |
| D3ZN21_RAT | Protein RGD1309586 GN=RGD1309586 PE=3 SV=1                                                                                      |
| D3ZN27_RAT | Protein Dnajc13 GN=Dnajc13 PE=4 SV=2                                                                                            |
| D3ZN76_RAT | Protein Sec16a GN=Sec16a PE=4 SV=1                                                                                              |
| D3ZNI3_RAT | Protein Pdcd11 GN=Pdcd11 PE=4 SV=1                                                                                              |
| D3ZNI6_RAT | Protein Dnajc13 GN=Dnajc13 PE=4 SV=2                                                                                            |
| D3ZNO6_RAT | Protein Ube2m GN=Ube2m PE=3 SV=1                                                                                                |



|            |                                                                                                                      |
|------------|----------------------------------------------------------------------------------------------------------------------|
| D3ZNR0_RAT | Protein RGD1560927 GN=RGD1560927 PE=4 SV=2                                                                           |
| D3ZNS8_RAT | Achalasia, adrenocortical insufficiency, alacrimia (Allgrove, triple-A) (Predicted), isoform CRA_a GN=Aaas PE=4 SV=2 |
| D3ZNV9_RAT | Complement component C1q receptor GN=Cd93 PE=4 SV=2                                                                  |
| D3ZP13_RAT | Sulfhydryl oxidase GN=Qsox2 PE=3 SV=1                                                                                |
| D3ZP98_RAT | Histocompatibility 13 (Predicted), isoform CRA_a GN=Hm13 PE=4 SV=1                                                   |
| D3ZPF5_RAT | Protein Smarcc2 GN=Smarcc2 PE=4 SV=1                                                                                 |
| D3ZPL1_RAT | Cleavage and polyadenylation specific factor 6, 68kDa (Predicted), isoform CRA_b GN=Cpsf6 PE=4 SV=2                  |
| D3ZPN7_RAT | Protein LOC100360604 GN=LOC100360604 PE=4 SV=1                                                                       |
| D3ZPR0_RAT | Chromosome segregation 1-like (S. cerevisiae) (Predicted) GN=Cse1l PE=4 SV=1                                         |
| D3ZQ25_RAT | Fibulin-1 GN=Fbln1 PE=3 SV=1                                                                                         |
| D3ZQ32_RAT | Protein Pappa2 GN=LOC304903 PE=4 SV=2                                                                                |
| D3ZQ74_RAT | Procollagen-lysine, 2-oxoglutarate 5-dioxygenase 1 GN=Plod1 PE=4 SV=2                                                |
| D3ZQM0_RAT | Protein Sf3a1 GN=Sf3a1 PE=4 SV=1                                                                                     |
| D3ZQN7_RAT | Protein Lamb1 GN=Lamb1 PE=4 SV=2                                                                                     |
| D3ZR49_RAT | Protein Man1a2 GN=Man1a2 PE=4 SV=2                                                                                   |
| D3ZR53_RAT | Protein phosphatase 1 regulatory subunit 12 GN=Ppp1r12a PE=1 SV=2                                                    |
| D3ZRD9_RAT | Protein Aif1l GN=Aif1l PE=4 SV=1                                                                                     |
| D3ZRE3_RAT | Casein kinase I isoform alpha GN=Csnk1a1 PE=2 SV=1                                                                   |
| D3ZRN3_RAT | Protein Actbl2 GN=Actbl2 PE=3 SV=1                                                                                   |
| D3ZRP6_RAT | Protein Ap1m2 GN=Ap1m2 PE=4 SV=2                                                                                     |
| D3ZRX9_RAT | Protein Cnn2 GN=Cnn2 PE=4 SV=2                                                                                       |
| D3ZS58_RAT | NADH dehydrogenase [ubiquinone] 1 alpha subcomplex subunit 2 GN=Ndufa2 PE=3 SV=1                                     |
| D3ZSA9_RAT | Protein Nomo1 GN=Nomo1 PE=4 SV=1                                                                                     |
| D3ZSF9_RAT | Protein Rpl22l2 GN=Rpl22l2 PE=4 SV=1                                                                                 |
| D3ZT23_RAT | Uncharacterized protein PE=4 SV=2                                                                                    |
| D3ZT90_RAT | Glutaryl-Coenzyme A dehydrogenase (Predicted) GN=Gcdh PE=3 SV=1                                                      |
| D3ZTB5_RAT | Protein S100a13 GN=S100a13 PE=4 SV=2                                                                                 |
| D3ZTH8_RAT | Protein LOC689899 GN=LOC689899 PE=3 SV=1                                                                             |
| D3ZTL0_RAT | Protein Tcerg1 GN=Tcerg1 PE=4 SV=1                                                                                   |
| D3ZTT7_RAT | Protein Sun2 GN=Sun2 PE=4 SV=1                                                                                       |
| D3ZU13_RAT | Protein LOC100911431 GN=Eif4g1 PE=4 SV=1                                                                             |
| D3ZU22_RAT | Protein LOC100910109 GN=LOC100361311 PE=4 SV=1                                                                       |
| D3ZU32_RAT | Latrophilin-2 GN=Lphn2 PE=4 SV=2                                                                                     |
| D3ZU83_RAT | ERGIC and golgi 3 (Predicted) GN=Ergic3 PE=4 SV=1                                                                    |
| D3ZUB0_RAT | Protein Rcn1 GN=Rcn1 PE=4 SV=1                                                                                       |
| D3ZUC2_RAT | Protein Mov10 GN=Mov10 PE=4 SV=1                                                                                     |
| D3ZUC9_RAT | Oxidative-stress responsive 1 (Predicted) GN=Oxsr1 PE=4 SV=1                                                         |
| D3ZUD8_RAT | Protein Tm9sf3 GN=Tm9sf3 PE=4 SV=1                                                                                   |
| D3ZUF9_RAT | Pitrilysin metallopeptidase 1 (Predicted) GN=Pitrm1 PE=3 SV=1                                                        |
| D3ZUJ8_RAT | Protein Tmtc3 GN=Tmtc3 PE=4 SV=1                                                                                     |
| D3ZUJ9_RAT | Protein Snx8 GN=Snx8 PE=4 SV=1                                                                                       |
| D3ZUL3_RAT | Protein Col6a1 GN=Col6a1 PE=4 SV=1                                                                                   |
| D3ZUP5_RAT | Protein Brk1 GN=Brk1 PE=4 SV=1                                                                                       |
| D3ZUR9_RAT | Uncharacterized protein (Fragment) GN=Lnpes PE=4 SV=2                                                                |
| D3ZUV3_RAT | Eukaryotic translation initiation factor 2 subunit 1 GN=Eif2a PE=4 SV=2                                              |
| D3ZUX5_RAT | Coiled-coil-helix-coiled-coil-helix domain containing 3 (Predicted), isoform CRA_a GN=Chchd3 PE=4 SV=1               |
| D3ZUY0_RAT | Protein Rdh14 GN=Rdh14 PE=3 SV=1                                                                                     |
| D3ZUY8_RAT | Adaptor protein complex AP-2, alpha 1 subunit (Predicted) GN=Ap2a1 PE=1 SV=1                                         |
| D3ZUZ4_RAT | Protein Fam20b GN=Fam20b PE=4 SV=1                                                                                   |
| D3ZV63_RAT | Protein RGD1307830 GN=RGD1307830 PE=4 SV=1                                                                           |
| D3ZV64_RAT | Protein RGD1307830 GN=RGD1307830 PE=4 SV=1                                                                           |
| D3ZVD8_RAT | Protein LOC100911205 GN=Hdac6 PE=4 SV=2                                                                              |
| D3ZVK6_RAT | RCG26843 GN=rCG_26843 PE=4 SV=1                                                                                      |
| D3ZVL1_RAT | Protein LOC100912115 GN=LOC100912115 PE=4 SV=2                                                                       |
| D3ZVM5_RAT | Heat shock protein 70kDa 12B (Predicted) GN=Hspa12b PE=4 SV=2                                                        |
| D3ZVQ0_RAT | Ubiquitin carboxyl-terminal hydrolase GN=Usp5 PE=3 SV=1                                                              |
| D3ZVU7_RAT | Histone deacetylase (Fragment) GN=Hdac1l PE=3 SV=2                                                                   |
| D3ZW15_RAT | Protein Sec24b GN=Sec24b PE=4 SV=1                                                                                   |
| D3ZWD6_RAT | Complement component 8, alpha polypeptide (Predicted) GN=C8a PE=4 SV=1                                               |
| D3ZWL6_RAT | Adenosylhomocysteinase GN=Ahcyl2 PE=3 SV=2                                                                           |
| D3ZWS0_RAT | Protein Scrib GN=Scrib PE=4 SV=1                                                                                     |

|            |                                                                                                      |
|------------|------------------------------------------------------------------------------------------------------|
| D3ZWS9_RAT | Protein Kb23 GN=Kb23 PE=3 SV=2                                                                       |
| D3ZWX1_RAT | Protein Tmem87a GN=Tmem87a PE=4 SV=2                                                                 |
| D3ZWZ6_RAT | Protein Igf2bp2 (Fragment) GN=Igf2bp2 PE=4 SV=2                                                      |
| D3ZWZ9_RAT | G protein-coupled receptor 107 (Predicted) GN=Gpr107 PE=4 SV=1                                       |
| D3ZXF9_RAT | Protein Mrpl12 GN=Mrpl12 PE=3 SV=1                                                                   |
| D3ZXH7_RAT | Protein Alyref GN=Alyref PE=4 SV=1                                                                   |
| D3ZXK9_RAT | Purine nucleoside phosphorylase (Fragment) GN=Pnp PE=3 SV=2                                          |
| D3ZXP3_RAT | Histone H2A GN=H2afx PE=3 SV=1                                                                       |
| D3ZXS8_RAT | Huntingtin interacting protein 2 (Predicted), isoform CRA_a GN=Ube2k PE=3 SV=1                       |
| D3ZXY2_RAT | PDZ domain containing 8 (Predicted) GN=Pdzd8 PE=4 SV=1                                               |
| D3ZY66_RAT | Uncharacterized protein (Fragment) PE=4 SV=2                                                         |
| D3ZY96_RAT | Neutrophilic granule protein (Predicted) GN=Ngp PE=4 SV=1                                            |
| D3ZYR4_RAT | Protein Sema4d GN=Sema4d PE=4 SV=2                                                                   |
| D3ZYS7_RAT | Protein G3bp1 GN=G3bp1 PE=4 SV=1                                                                     |
| D3ZYX8_RAT | Cytochrome c oxidase subunit VIIa polypeptide 2 like (Predicted), isoform CRA_e GN=Cox7a2l PE=4 SV=1 |
| D3ZZ81_RAT | Protein Ppfia1 GN=Ppfia1 PE=4 SV=1                                                                   |
| D3ZZ95_RAT | 60S ribosomal protein L36 GN=LOC100361060 PE=3 SV=1                                                  |
| D3ZZA8_RAT | Protein Sec24a GN=Sec24a PE=4 SV=1                                                                   |
| D3ZZC1_RAT | Protein Txndc5 GN=Txndc5 PE=3 SV=1                                                                   |
| D3ZZF8_RAT | Polyadenylate binding protein-interacting protein 1 (Predicted) GN=Paip1 PE=4 SV=2                   |
| D3ZZK1_RAT | Protein LOC100359563 GN=LOC100359563 PE=3 SV=1                                                       |
| D3ZZM0_RAT | Protein Slc39a14 GN=Slc39a14 PE=4 SV=1                                                               |
| D3ZZM1_RAT | Uncharacterized protein (Fragment) PE=4 SV=2                                                         |
| D3ZZN4_RAT | Protein LOC100362338 GN=LOC100362338 PE=4 SV=1                                                       |
| D3ZZQ8_RAT | Protein RGD1561381 GN=RGD1561381 PE=4 SV=1                                                           |
| D3ZZR5_RAT | Protein Snrpa1 GN=Snrpa1 PE=4 SV=1                                                                   |
| D3ZZR9_RAT | Peptidyl-prolyl cis-trans isomerase GN=Fkbp2 PE=4 SV=1                                               |
| D3ZZV1_RAT | Mitochondrial import inner membrane translocase subunit TIM16 GN=Pam16 PE=4 SV=1                     |
| D3ZZZ9_RAT | Catenin (Cadherin associated protein), delta 1 (Predicted), isoform CRA_a GN=Ctnnd1 PE=1 SV=1        |
| D4A017_RAT | Protein Tmem87a GN=Tmem87a PE=4 SV=2                                                                 |
| D4A030_RAT | Protein Ubp1 GN=Ubp1 PE=4 SV=1                                                                       |
| D4A054_RAT | Protein LOC100911178 GN=Ranbp2 PE=1 SV=1                                                             |
| D4A0E2_RAT | Protein Napg GN=Napg PE=4 SV=1                                                                       |
| D4A0F5_RAT | Septin-7 GN=Sept7 PE=3 SV=2                                                                          |
| D4A0H5_RAT | Cleavage and polyadenylation specific factor 1, 160kDa (Predicted), isoform CRA_a GN=Cpsf1 PE=4 SV=1 |
| D4A0J4_RAT | Protein Vwa2 GN=Vwa2 PE=4 SV=2                                                                       |
| D4A0T0_RAT | Protein Ndufb10 GN=Ndufb10 PE=4 SV=1                                                                 |
| D4A0W1_RAT | Protein Emc4 GN=Emc4 PE=4 SV=1                                                                       |
| D4A0W7_RAT | Protein Fndc3b GN=Fndc3b PE=4 SV=2                                                                   |
| D4A106_RAT | Protein Wdr3 GN=Wdr3 PE=4 SV=1                                                                       |
| D4A111_RAT | Protein Col6a3 GN=Col6a3 PE=4 SV=2                                                                   |
| D4A129_RAT | Calpastatin GN=Cast PE=2 SV=1                                                                        |
| D4A133_RAT | Protein Atp6v1a GN=Atp6v1a PE=3 SV=1                                                                 |
| D4A1B8_RAT | Protein Dctn3 GN=Dctn3 PE=4 SV=1                                                                     |
| D4A1B9_RAT | Chondroitin sulfate proteoglycan 6, isoform CRA_b GN=Smc3 PE=4 SV=1                                  |
| D4A1D8_RAT | Protein Surf4 GN=Surf4 PE=4 SV=1                                                                     |
| D4A1G4_RAT | Cytochrome b5 GN=Cyb5a PE=2 SV=1                                                                     |
| D4A1J6_RAT | Protein Ankfy1 (Fragment) GN=Ankfy1 PE=4 SV=2                                                        |
| D4A1Q9_RAT | Protein Ttl12 GN=Ttl12 PE=4 SV=1                                                                     |
| D4A1R8_RAT | Protein LOC100910990 GN=Cpne1 PE=4 SV=1                                                              |
| D4A1S6_RAT | Protein phosphatase 1 regulatory subunit 12 GN=Ppp1r12a PE=1 SV=2                                    |
| D4A206_RAT | Protein Tcof1 GN=Tcof1 PE=1 SV=2                                                                     |
| D4A2F1_RAT | Agrin GN=Agrn PE=4 SV=2                                                                              |
| D4A2G9_RAT | Protein Ranbp1 GN=Ranbp1 PE=4 SV=1                                                                   |
| D4A2H2_RAT | Protein Sptlc1 GN=Sptlc1 PE=4 SV=1                                                                   |
| D4A2I4_RAT | ORM1-like 2 ( <i>S. cerevisiae</i> ) (Predicted), isoform CRA_a GN=Ormdl2 PE=4 SV=1                  |
| D4A2P1_RAT | Protein Ccar1 GN=Ccar1 PE=4 SV=2                                                                     |
| D4A2Y9_RAT | Peroxisomal biogenesis factor 13 (Predicted) GN=Pex13 PE=4 SV=1                                      |
| D4A2Z6_RAT | Protein Sec63 GN=Sec63 PE=4 SV=1                                                                     |
| D4A305_RAT | Coiled-coil domain containing 58 (Predicted), isoform CRA_c GN=Ccdc58 PE=1 SV=1                      |
| D4A319_RAT | Protein Dlg5 GN=Dlg5 PE=4 SV=2                                                                       |

|            |                                                                                                     |
|------------|-----------------------------------------------------------------------------------------------------|
| D4A3E1_RAT | Protein Hnrnp1l GN=Hnrnp1l PE=4 SV=1                                                                |
| D4A3H0_RAT | Oxysterol-binding protein GN=Osbp13 PE=3 SV=1                                                       |
| D4A3H9_RAT | Protein Tmem87a GN=Tmem87a PE=4 SV=2                                                                |
| D4A3K3_RAT | Protein Dlg5 GN=Dlg5 PE=4 SV=2                                                                      |
| D4A3T3_RAT | Protein Cbx1 GN=Cbx1 PE=4 SV=1                                                                      |
| D4A3V2_RAT | NADH dehydrogenase [ubiquinone] 1 alpha subcomplex subunit 6 GN=Ndufa6 PE=3 SV=1                    |
| D4A3X0_RAT | Protein Seh1 GN=Seh1 PE=4 SV=2                                                                      |
| D4A401_RAT | Protein Tex10 GN=Tex10 PE=4 SV=2                                                                    |
| D4A409_RAT | Laminin, alpha 1 GN=Lama1 PE=2 SV=1                                                                 |
| D4A433_RAT | Protein Foxo4 GN=Foxo4 PE=4 SV=1                                                                    |
| D4A436_RAT | Integrin beta GN=Itgb5 PE=3 SV=2                                                                    |
| D4A447_RAT | Protein Cd109 GN=Cd109 PE=4 SV=2                                                                    |
| D4A450_RAT | Protein Bclaf1 GN=Bclaf1 PE=1 SV=2                                                                  |
| D4A465_RAT | Protein Lamtor2 GN=Lamtor2 PE=4 SV=1                                                                |
| D4A4B4_RAT | Protein U2surp GN=U2surp PE=4 SV=1                                                                  |
| D4A4J0_RAT | Protein Supt16h GN=Supt16h PE=4 SV=1                                                                |
| D4A4L5_RAT | Protein Isca2 GN=Isca2 PE=4 SV=1                                                                    |
| D4A4X4_RAT | Protein Cgn GN=Cgn PE=4 SV=1                                                                        |
| D4A4X7_RAT | Protein Mospd2 GN=Mospd2 PE=4 SV=1                                                                  |
| D4A4Z9_RAT | Protein Ktn1 GN=Ktn1 PE=4 SV=2                                                                      |
| D4A510_RAT | Protein Smarcc2 GN=Smarcc2 PE=4 SV=2                                                                |
| D4A565_RAT | NADH dehydrogenase (Ubiquinone) 1 beta subcomplex, 5 (Predicted), isoform CRA_b GN=Ndufb5 PE=4 SV=1 |
| D4A567_RAT | Uncharacterized protein PE=4 SV=2                                                                   |
| D4A5G8_RAT | Protein Pdha1l1 GN=Pdha1l1 PE=1 SV=2                                                                |
| D4A5I9_RAT | Protein Myo6 GN=Myo6 PE=4 SV=2                                                                      |
| D4A5K6_RAT | Protein Zmpste24 GN=Zmpste24 PE=4 SV=1                                                              |
| D4A5L9_RAT | Protein LOC679794 GN=LOC679794 PE=3 SV=1                                                            |
| D4A5T1_RAT | Protein Sf3b5 GN=Sf3b5 PE=4 SV=1                                                                    |
| D4A5T8_RAT | Periplakin (Predicted) GN=Ppl PE=1 SV=1                                                             |
| D4A5W8_RAT | Protein Pgs1 GN=Pgs1 PE=4 SV=1                                                                      |
| D4A5X8_RAT | Protein Ahcyl1 GN=Ahcyl1 PE=3 SV=1                                                                  |
| D4A678_RAT | Protein Spta1 GN=Spta1 PE=1 SV=2                                                                    |
| D4A6C5_RAT | Protein Arhgap1 GN=Arhgap1 PE=4 SV=1                                                                |
| D4A6G6_RAT | Protein LOC100362339 GN=LOC100362339 PE=4 SV=1                                                      |
| D4A6X1_RAT | Dysferlin (Predicted), isoform CRA_a GN=Dysf PE=4 SV=2                                              |
| D4A720_RAT | Protein Srsf7 GN=Srsf7 PE=4 SV=1                                                                    |
| D4A781_RAT | Protein Ipo5 GN=Ipo5 PE=4 SV=1                                                                      |
| D4A786_RAT | Protein LOC100360002 GN=LOC100362685 PE=4 SV=1                                                      |
| D4A792_RAT | Protein 5430419D17Rik (Fragment) GN=LOC678798 PE=4 SV=2                                             |
| D4A7C9_RAT | Protein Apobr GN=Apobr PE=4 SV=1                                                                    |
| D4A7J8_RAT | PRP4 pre-mRNA processing factor 4 homolog (Yeast) GN=Prpf4 PE=4 SV=1                                |
| D4A7L4_RAT | NADH dehydrogenase (Ubiquinone) 1 beta subcomplex, 11 (Predicted) GN=Ndufb11 PE=4 SV=1              |
| D4A7R0_RAT | Signal recognition particle subunit SRP72 GN=LOC100910272 PE=3 SV=2                                 |
| D4A7R3_RAT | Nucleoporin 205kDa (Predicted) GN=Nup205 PE=4 SV=1                                                  |
| D4A7U1_RAT | Protein Zyx GN=Zyx PE=4 SV=1                                                                        |
| D4A820_RAT | Cytochrome P450, family 2, subfamily s, polypeptide 1 GN=Cyp2s1 PE=3 SV=1                           |
| D4A882_RAT | Propionyl-CoA carboxylase alpha chain, mitochondrial GN=Pcca PE=4 SV=2                              |
| D4A8A0_RAT | DNA fragmentation factor subunit beta GN=Cad PE=3 SV=2                                              |
| D4A8D5_RAT | Filamin, beta (Predicted) GN=Flnb PE=4 SV=1                                                         |
| D4A8F2_RAT | Protein Rsu1 GN=Rsu1 PE=4 SV=2                                                                      |
| D4A8H3_RAT | Protein Uba6 GN=Uba6 PE=4 SV=1                                                                      |
| D4A8H8_RAT | Cytoplasmic FMR1 interacting protein 1 (Predicted) GN=Cyfi1 PE=4 SV=1                               |
| D4A8K4_RAT | Protein Tmem82 GN=Tmem82 PE=4 SV=1                                                                  |
| D4A8N1_RAT | Protein Dpm1 GN=Dpm1 PE=4 SV=1                                                                      |
| D4A8T3_RAT | Coatomer protein complex, subunit zeta 1 (Predicted) GN=Copz1 PE=4 SV=1                             |
| D4A8U5_RAT | Dynamin-like 120 kDa protein, mitochondrial GN=Opa1 PE=3 SV=2                                       |
| D4A8U7_RAT | Dynactin 1, isoform CRA_a GN=Dctn1 PE=4 SV=2                                                        |
| D4A8X8_RAT | CTTNBP2 N-terminal like (Predicted), isoform CRA_a GN=Cttnbp2nl PE=1 SV=1                           |
| D4A944_RAT | Protein Snrnp40 GN=Snrnp40 PE=4 SV=2                                                                |
| D4A962_RAT | Heterogeneous nuclear ribonucleoprotein U-like 1 (Predicted) GN=Hnrnpul1 PE=4 SV=1                  |
| D4A994_RAT | Protein Emc1 GN=Emc1 PE=4 SV=1                                                                      |

|            |                                                                                                               |
|------------|---------------------------------------------------------------------------------------------------------------|
| D4A997_RAT | HIV TAT specific factor 1 (Predicted) GN=Htatsf1 PE=4 SV=2                                                    |
| D4A9D6_RAT | DEAH (Asp-Glu-Ala-His) box polypeptide 9 (Predicted) GN=Dhx9 PE=4 SV=1                                        |
| D4A9D8_RAT | Oxysterol-binding protein GN=Osbp PE=1 SV=2                                                                   |
| D4A9H0_RAT | Protein Rab22a GN=Rab22a PE=4 SV=1                                                                            |
| D4A9J3_RAT | Protein Sema4c GN=Sema4c PE=4 SV=1                                                                            |
| D4A9L2_RAT | Protein Srsf1 GN=Srsf1 PE=4 SV=1                                                                              |
| D4A9N5_RAT | Protein Trim25 GN=Trim25 PE=4 SV=2                                                                            |
| D4A9Q2_RAT | Protein Amot GN=Amot PE=1 SV=2                                                                                |
| D4A9T3_RAT | Protein Hmg11l GN=Hmg11l PE=4 SV=2                                                                            |
| D4A9Y0_RAT | Protein Sdf2l1 GN=Sdf2l1 PE=4 SV=1                                                                            |
| D4AA14_RAT | Protein Aifm2 GN=Aifm2 PE=4 SV=1                                                                              |
| D4AA43_RAT | Protein Klhl40 GN=Klhl40 PE=4 SV=2                                                                            |
| D4AA63_RAT | Protein Ubqln2 GN=Ubqln2 PE=4 SV=1                                                                            |
| D4AAE9_RAT | Protein Cisd2 GN=Cisd2 PE=4 SV=1                                                                              |
| D4AAI5_RAT | Cullin-associated NEDD8-dissociated protein 2 GN=Cand2 PE=4 SV=1                                              |
| D4AAL6_RAT | Chemokine (C-C motif) ligand 27 (Predicted), isoform CRA_b GN=Ccl27 PE=4 SV=1                                 |
| D4AAT4_RAT | Protein Snrpf GN=Snrpf PE=4 SV=1                                                                              |
| D4AAV2_RAT | Rho GTPase-activating protein 17 GN=Arhgap17 PE=4 SV=2                                                        |
| D4AAV4_RAT | Rho GTPase-activating protein 17 GN=Arhgap17 PE=4 SV=2                                                        |
| D4AAV9_RAT | Protein Tspan9 GN=Tspan9 PE=4 SV=1                                                                            |
| D4AB03_RAT | Protein Fam120a GN=Fam120a PE=4 SV=2                                                                          |
| D4AB33_RAT | Protein phosphatase 1 regulatory subunit 15A GN=Peg3 PE=4 SV=1                                                |
| D4AB50_RAT | Protein Arhgap10 GN=Arhgap10 PE=4 SV=1                                                                        |
| D4ABD7_RAT | Protein Trip11 GN=Trip11 PE=4 SV=2                                                                            |
| D4ABI6_RAT | Protein RGD1561252 GN=RGD1561252 PE=4 SV=2                                                                    |
| D4ABK7_RAT | Heterogeneous nuclear ribonucleoprotein H3 (2H9) (Predicted), isoform CRA_c GN=Hnrnph3 PE=4 SV=1              |
| D4ABM3_RAT | Dishevelled associated activator of morphogenesis 1 (Predicted) GN=Daam1 PE=4 SV=1                            |
| D4ABT8_RAT | Protein Hnrnpul2 GN=Hnrnpul2 PE=1 SV=1                                                                        |
| D4ABX6_RAT | Protein Mmrn2 GN=Mmrn2 PE=4 SV=1                                                                              |
| D4AC20_RAT | Cytidine deaminase (Predicted) GN=Cda PE=4 SV=1                                                               |
| D4AC23_RAT | Protein Cct7 GN=Cct7 PE=3 SV=1                                                                                |
| D4AC36_RAT | Eukaryotic translation initiation factor 3, subunit 5 (Epsilon) (Predicted), isoform CRA_a GN=Eif3f PE=4 SV=2 |
| D4ACB8_RAT | Chaperonin subunit 8 (Theta) (Predicted), isoform CRA_a GN=Cct8 PE=3 SV=1                                     |
| D4ACC2_RAT | Protein Kank2 GN=Kank2 PE=4 SV=1                                                                              |
| D4ACG2_RAT | IlvB (Bacterial acetolactate synthase)-like (Predicted), isoform CRA_c GN=Ilvbl PE=3 SV=1                     |
| D4ACJ1_RAT | 40S ribosomal protein S24 GN=LOC100363469 PE=3 SV=1                                                           |
| D4ACK1_RAT | Protein Nup214 (Fragment) GN=Nup214 PE=4 SV=2                                                                 |
| D4ACM1_RAT | Protein Elp3 GN=Elp3 PE=4 SV=1                                                                                |
| D4ACM4_RAT | cAMP-dependent protein kinase catalytic subunit alpha GN=Prkaca PE=2 SV=1                                     |
| D4ACN7_RAT | Protein Myof GN=Myof PE=4 SV=2                                                                                |
| D4ACS0_RAT | Protein phosphatase 1 regulatory subunit 12 GN=Ppp1r12a PE=1 SV=2                                             |
| D4ACU9_RAT | Protein Itga5 (Fragment) GN=Itga5 PE=3 SV=2                                                                   |
| D4ACV3_RAT | Histone H2A GN=Hist2h2ac PE=3 SV=1                                                                            |
| D4ACW1_RAT | Protein Nop2 GN=Nop2 PE=4 SV=2                                                                                |
| D4AD15_RAT | Protein LOC100911431 GN=Eif4g1 PE=4 SV=1                                                                      |
| D4AD70_RAT | Protein RGD1561636 GN=RGD1561636 PE=3 SV=1                                                                    |
| D4ADA7_RAT | Uncharacterized protein PE=4 SV=2                                                                             |
| D4ADD7_RAT | Glutaredoxin 5 homolog (S. cerevisiae) (Predicted), isoform CRA_b GN=Glrx5 PE=4 SV=1                          |
| D4ADE8_RAT | DEAD/H (Asp-Glu-Ala-Asp/His) box polypeptide 3, X-linked GN=Ddx3x PE=4 SV=2                                   |
| D4ADS4_RAT | Protein Mgst3 GN=Mgst3 PE=4 SV=1                                                                              |
| D4ADS9_RAT | Protein Efr3a GN=Efr3a PE=1 SV=1                                                                              |
| D4AE06_RAT | Peptidyl-prolyl cis-trans isomerase (Fragment) GN=Fkbp15 PE=4 SV=2                                            |
| D4AE49_RAT | Protein Skiv2l2 (Fragment) GN=Skiv2l2 PE=4 SV=2                                                               |
| D4AE56_RAT | Prostaglandin E synthase 2 (Predicted), isoform CRA_b GN=Ptges2 PE=3 SV=1                                     |
| D4AE58_RAT | Protein Kank1 GN=Kank1 PE=4 SV=1                                                                              |
| D4AE68_RAT | Guanine nucleotide binding protein, alpha q polypeptide, isoform CRA_a GN=Gnaq PE=4 SV=2                      |
| D4AE96_RAT | Importin 7 (Predicted), isoform CRA_c GN=Ipo7 PE=4 SV=1                                                       |
| D4AECO_RAT | Histone H2A GN=LOC685909 PE=3 SV=1                                                                            |
| D4AEH3_RAT | Proteasome (Prosome, macropain) 26S subunit, non-ATPase, 7 (Predicted) GN=Psm7 PE=4 SV=1                      |
| D4AEK9_RAT | Protein Ccdc6 (Fragment) GN=Ccdc6 PE=4 SV=2                                                                   |
| D4AEPO_RAT | Adenylosuccinate synthetase isozyme 2 GN=Adss PE=3 SV=1                                                       |

|            |                                                                                               |
|------------|-----------------------------------------------------------------------------------------------|
| DAD1_RAT   | Dolichyl-diphosphooligosaccharide--protein glycosyltransferase subunit DAD1 GN=Dad1 PE=3 SV=3 |
| DC1L1_RAT  | Cytoplasmic dynein 1 light intermediate chain 1 GN=Dync1li1 PE=1 SV=1                         |
| DC1L2_RAT  | Cytoplasmic dynein 1 light intermediate chain 2 GN=Dync1li2 PE=1 SV=1                         |
| DCAKD_RAT  | Dephospho-CoA kinase domain-containing protein GN=Dcakd PE=2 SV=1                             |
| DCTN2_RAT  | Dynactin subunit 2 GN=Dctn2 PE=1 SV=1                                                         |
| DDB1_RAT   | DNA damage-binding protein 1 GN=Ddb1 PE=2 SV=1                                                |
| DDX1_RAT   | ATP-dependent RNA helicase DDX1 GN=Ddx1 PE=2 SV=1                                             |
| DDX21_RAT  | Nucleolar RNA helicase 2 GN=Ddx21 PE=2 SV=1                                                   |
| DECR_RAT   | 2,4-dienoyl-CoA reductase, mitochondrial GN=Decr1 PE=1 SV=2                                   |
| DEF4_RAT   | Neutrophil antibiotic peptide NP-4 GN=Np4 PE=1 SV=1                                           |
| DEGS1_RAT  | Sphingolipid delta(4)-desaturase DES1 GN=Degs1 PE=2 SV=1                                      |
| DEST_RAT   | Destrin GN=Dstn PE=1 SV=3                                                                     |
| DHB11_RAT  | Estradiol 17-beta-dehydrogenase 11 GN=Hsd17b11 PE=2 SV=1                                      |
| DHB12_RAT  | Estradiol 17-beta-dehydrogenase 12 GN=Hsd17b12 PE=2 SV=1                                      |
| DHB2_RAT   | Estradiol 17-beta-dehydrogenase 2 GN=Hsd17b2 PE=2 SV=1                                        |
| DHB4_RAT   | Peroxisomal multifunctional enzyme type 2 GN=Hsd17b4 PE=1 SV=3                                |
| DHE3_RAT   | Glutamate dehydrogenase 1, mitochondrial GN=Glud1 PE=1 SV=2                                   |
| DHI2_RAT   | Corticosteroid 11-beta-dehydrogenase isozyme 2 GN=Hsd11b2 PE=1 SV=1                           |
| DHPR_RAT   | Dihydropteridine reductase GN=Qdpr PE=1 SV=1                                                  |
| DHRS4_RAT  | Dehydrogenase/reductase SDR family member 4 GN=Dhrs4 PE=2 SV=2                                |
| DHRS9_RAT  | Dehydrogenase/reductase SDR family member 9 GN=Dhrs9 PE=2 SV=1                                |
| DIDH_RAT   | 3-alpha-hydroxysteroid dehydrogenase GN=Akr1c9 PE=1 SV=1                                      |
| DJB11_RAT  | DnaJ homolog subfamily B member 11 GN=Dnjb11 PE=2 SV=1                                        |
| DJC10_RAT  | DnaJ homolog subfamily C member 10 GN=Dnajc10 PE=2 SV=2                                       |
| DKC1_RAT   | H/ACA ribonucleoprotein complex subunit 4 GN=Dkc1 PE=1 SV=4                                   |
| DLDH_RAT   | Dihydrolipoyl dehydrogenase, mitochondrial GN=Dld PE=1 SV=1                                   |
| DLRB1_RAT  | Dynein light chain roadblock-type 1 GN=Dynlrb1 PE=1 SV=3                                      |
| DNJA1_RAT  | DnaJ homolog subfamily A member 1 GN=Dnaja1 PE=2 SV=1                                         |
| DNJA2_RAT  | DnaJ homolog subfamily A member 2 GN=Dnaja2 PE=2 SV=1                                         |
| DNJB6_RAT  | DnaJ homolog subfamily B member 6 GN=Dnjb6 PE=1 SV=1                                          |
| DNJC3_RAT  | DnaJ homolog subfamily C member 3 GN=Dnajc3 PE=2 SV=3                                         |
| DNJC5_RAT  | DnaJ homolog subfamily C member 5 GN=Dnajc5 PE=1 SV=1                                         |
| DPP2_RAT   | Dipeptidyl peptidase 2 GN=Dpp7 PE=1 SV=1                                                      |
| DPP3_RAT   | Dipeptidyl peptidase 3 GN=Dpp3 PE=1 SV=2                                                      |
| DPYL2_RAT  | Dihydropyrimidinase-related protein 2 GN=Dpysl2 PE=1 SV=1                                     |
| DX39A_RAT  | ATP-dependent RNA helicase DDX39A GN=Ddx39a PE=2 SV=1                                         |
| DX39B_RAT  | Spliceosome RNA helicase Ddx39b GN=Ddx39b PE=1 SV=3                                           |
| DYL1_RAT   | Dynein light chain 1, cytoplasmic GN=Dynll1 PE=1 SV=1                                         |
| E2AK2_RAT  | Interferon-induced, double-stranded RNA-activated protein kinase GN=Eif2ak2 PE=1 SV=1         |
| E2RUH2_RAT | Ribonuclease inhibitor GN=Rnh1 PE=2 SV=1                                                      |
| E9PSK9_RAT | Protein LOC100364523 GN=Ctsql2 PE=3 SV=2                                                      |
| E9PST5_RAT | Protein Acin1 GN=Acin1 PE=1 SV=1                                                              |
| E9PSX3_RAT | Protein RT1-A GN=RT1-A PE=3 SV=2                                                              |
| E9PSY8_RAT | Protein Eps15 GN=Eps15 PE=4 SV=1                                                              |
| E9PT22_RAT | Uncharacterized protein PE=4 SV=2                                                             |
| E9PT29_RAT | Uncharacterized protein PE=3 SV=2                                                             |
| E9PT53_RAT | Protein Wfs1 GN=Wfs1 PE=4 SV=2                                                                |
| E9PT65_RAT | Protein Rdx GN=Rdx PE=4 SV=1                                                                  |
| E9PT66_RAT | Protein Sf3b3 GN=Sf3b3 PE=4 SV=2                                                              |
| E9PTB2_RAT | Transcription elongation factor SPT5 GN=Supt5h PE=3 SV=2                                      |
| E9PTCO_RAT | Protein PVR GN=PVR PE=4 SV=1                                                                  |
| E9PTD2_RAT | Phosphatidylinositol-binding clathrin assembly protein GN=Picalm PE=4 SV=2                    |
| E9PTF3_RAT | Protein Noc2l GN=Noc2l PE=4 SV=1                                                              |
| E9PTF9_RAT | Protein Wasf2 GN=Wasf2 PE=4 SV=2                                                              |
| E9PTI1_RAT | Protein Atp6v1h GN=Atp6v1h PE=4 SV=1                                                          |
| E9PTI6_RAT | Protein Raly GN=Raly PE=4 SV=1                                                                |
| E9PTJ8_RAT | Rho guanine nucleotide exchange factor 1 GN=Arhgef1 PE=4 SV=2                                 |
| E9PTK8_RAT | Protein Lmo7 GN=Lmo7 PE=1 SV=1                                                                |
| E9PTN4_RAT | Protein Srpk1 (Fragment) GN=Srpk1 PE=3 SV=2                                                   |
| E9PTR4_RAT | Protein Ubap2l GN=Ubap2l PE=4 SV=2                                                            |
| E9PTU4_RAT | Myosin-11 GN=Myh11 PE=4 SV=2                                                                  |

|            |                                                                                            |
|------------|--------------------------------------------------------------------------------------------|
| E9PTW1_RAT | Protein Scamp3 GN=Scamp3 PE=4 SV=2                                                         |
| E9PU13_RAT | Protein Snx4 GN=Snx4 PE=4 SV=1                                                             |
| E9PU37_RAT | Palmitoyltransferase GN=Zdhhc13 PE=3 SV=1                                                  |
| E9PU56_RAT | Protein Dmkn GN=Dmkn PE=4 SV=2                                                             |
| E9PU78_RAT | Protein Bcl2l1-ps1 GN=Bcl2l1-ps1 PE=4 SV=1                                                 |
| ECH1_RAT   | Delta(3,5)-Delta(2,4)-dienoyl-CoA isomerase, mitochondrial GN=Ech1 PE=1 SV=2               |
| ECHA_RAT   | Trifunctional enzyme subunit alpha, mitochondrial GN=Hadha PE=1 SV=2                       |
| ECHB_RAT   | Trifunctional enzyme subunit beta, mitochondrial GN=Hadhb PE=1 SV=1                        |
| ECHM_RAT   | Enoyl-CoA hydratase, mitochondrial GN=Echs1 PE=1 SV=1                                      |
| ECI1_RAT   | Enoyl-CoA delta isomerase 1, mitochondrial GN=Eci1 PE=1 SV=1                               |
| ECI2_RAT   | Enoyl-CoA delta isomerase 2, mitochondrial GN=Eci2 PE=1 SV=1                               |
| ECM1_RAT   | Extracellular matrix protein 1 GN=Ecm1 PE=2 SV=2                                           |
| EDC4_RAT   | Enhancer of mRNA-decapping protein 4 GN=Edc4 PE=2 SV=1                                     |
| EF1A1_RAT  | Elongation factor 1-alpha 1 GN=Eef1a1 PE=1 SV=1                                            |
| EF1G_RAT   | Elongation factor 1-gamma GN=Eef1g PE=1 SV=3                                               |
| EF2_RAT    | Elongation factor 2 GN=Eef2 PE=1 SV=4                                                      |
| EFGM_RAT   | Elongation factor G, mitochondrial GN=Gfm1 PE=1 SV=2                                       |
| EFTS_RAT   | Elongation factor Ts, mitochondrial GN=Tsfm PE=2 SV=1                                      |
| EFTU_RAT   | Elongation factor Tu, mitochondrial GN=Tufm PE=1 SV=1                                      |
| EHD1_RAT   | EH domain-containing protein 1 GN=Ehd1 PE=1 SV=1                                           |
| EHD3_RAT   | EH domain-containing protein 3 GN=Ehd3 PE=1 SV=2                                           |
| EIF3A_RAT  | Eukaryotic translation initiation factor 3 subunit A GN=Eif3a PE=2 SV=2                    |
| EIF3B_RAT  | Eukaryotic translation initiation factor 3 subunit B GN=Eif3b PE=1 SV=1                    |
| EIF3C_RAT  | Eukaryotic translation initiation factor 3 subunit C GN=Eif3c PE=2 SV=1                    |
| EIF3D_RAT  | Eukaryotic translation initiation factor 3 subunit D GN=Eif3d PE=2 SV=1                    |
| EIF3E_RAT  | Eukaryotic translation initiation factor 3 subunit E GN=Eif3e PE=2 SV=1                    |
| EIF3G_RAT  | Eukaryotic translation initiation factor 3 subunit G GN=Eif3g PE=2 SV=1                    |
| EIF3H_RAT  | Eukaryotic translation initiation factor 3 subunit H GN=Eif3h PE=2 SV=1                    |
| EIF3I_RAT  | Eukaryotic translation initiation factor 3 subunit I GN=Eif3i PE=2 SV=1                    |
| EIF3J_RAT  | Eukaryotic translation initiation factor 3 subunit J GN=Eif3j PE=2 SV=1                    |
| ELOB_RAT   | Transcription elongation factor B polypeptide 2 GN=Tceb2 PE=1 SV=1                         |
| ELOC_RAT   | Transcription elongation factor B polypeptide 1 GN=Tceb1 PE=1 SV=1                         |
| EMB_RAT    | Embigin GN=Emb PE=1 SV=1                                                                   |
| EMC10_RAT  | ER membrane protein complex subunit 10 GN=Emc10 PE=1 SV=1                                  |
| EMC2_RAT   | ER membrane protein complex subunit 2 GN=Emc2 PE=2 SV=1                                    |
| EMC3_RAT   | ER membrane protein complex subunit 3 GN=Emc3 PE=2 SV=3                                    |
| EMC8_RAT   | ER membrane protein complex subunit 8 GN=Emc8 PE=2 SV=1                                    |
| ENOA_RAT   | Alpha-enolase GN=Eno1 PE=1 SV=4                                                            |
| ENPP3_RAT  | Ectonucleotide pyrophosphatase/phosphodiesterase family member 3 GN=Enpp3 PE=1 SV=2        |
| ENTP1_RAT  | Ectonucleoside triphosphate diphosphohydrolase 1 GN=Entpd1 PE=1 SV=1                       |
| EPCAM_RAT  | Epithelial cell adhesion molecule GN=Epcam PE=1 SV=1                                       |
| EPN3_RAT   | Epsin-3 GN=Epn3 PE=2 SV=1                                                                  |
| ERD21_RAT  | ER lumen protein-retaining receptor 1 GN=Kdelr1 PE=2 SV=1                                  |
| ERD22_RAT  | ER lumen protein-retaining receptor 2 GN=Kdelr2 PE=2 SV=1                                  |
| ERF1_RAT   | Eukaryotic peptide chain release factor subunit 1 GN=Etf1 PE=2 SV=3                        |
| ERLN2_RAT  | Erlin-2 GN=Erlin2 PE=1 SV=1                                                                |
| ERMP1_RAT  | Endoplasmic reticulum metalloproteinase 1 GN=Ermp1 PE=1 SV=1                               |
| ERP29_RAT  | Endoplasmic reticulum resident protein 29 GN=Erp29 PE=1 SV=2                               |
| ES1_RAT    | ES1 protein homolog, mitochondrial PE=1 SV=2                                               |
| ESAM_RAT   | Endothelial cell-selective adhesion molecule GN=Esam PE=2 SV=1                             |
| EST1C_RAT  | Carboxylesterase 1C GN=Ces1c PE=1 SV=3                                                     |
| ESYT1_RAT  | Extended synaptotagmin-1 GN=Esyt1 PE=2 SV=1                                                |
| ETFA_RAT   | Electron transfer flavoprotein subunit alpha, mitochondrial GN=Etfa PE=1 SV=4              |
| ETFB_RAT   | Electron transfer flavoprotein subunit beta GN=Etfb PE=2 SV=3                              |
| ETFD_RAT   | Electron transfer flavoprotein-ubiquinone oxidoreductase, mitochondrial GN=Etfdh PE=1 SV=1 |
| EXOC2_RAT  | Exocyst complex component 2 GN=Exoc2 PE=1 SV=1                                             |
| EXOC4_RAT  | Exocyst complex component 4 GN=Exoc4 PE=1 SV=1                                             |
| EZRI_RAT   | Ezrin GN=Ezr PE=1 SV=3                                                                     |
| F10A1_RAT  | Hsc70-interacting protein GN=St13 PE=1 SV=1                                                |
| F136A_RAT  | Protein FAM136A GN=Fam136a PE=1 SV=1                                                       |
| F1LLW7_RAT | Dehydrogenase/reductase SDR family member 9 GN=Dhrs9 PE=3 SV=2                             |

|            |                                                                                        |
|------------|----------------------------------------------------------------------------------------|
| F1LLX8_RAT | Lysosome-associated membrane glycoprotein 2 GN=Lamp2 PE=4 SV=1                         |
| F1LM05_RAT | Protein LOC299282 GN=LOC299282 PE=3 SV=1                                               |
| F1LM09_RAT | Ubiquitin carboxyl-terminal hydrolase GN=Usp7 PE=3 SV=2                                |
| F1LM18_RAT | Polypyrimidine tract-binding protein 1 GN=Ptbp1 PE=2 SV=1                              |
| F1LM30_RAT | Uncharacterized protein (Fragment) PE=4 SV=2                                           |
| F1LM33_RAT | Leucine-rich PPR motif-containing protein, mitochondrial GN=Lrpprc PE=4 SV=2           |
| F1LM37_RAT | Protein Sf1 GN=Sf1 PE=4 SV=2                                                           |
| F1LM44_RAT | Kelch-like 13 (Drosophila) GN=Klh13 PE=4 SV=2                                          |
| F1LM47_RAT | Protein Sucla2 GN=Sucla2 PE=3 SV=1                                                     |
| F1LM55_RAT | Protein RGD1309922 GN=Ccar2 PE=4 SV=1                                                  |
| F1LM66_RAT | Protein Eftud2 GN=Eftud2 PE=4 SV=1                                                     |
| F1LM84_RAT | Nidogen-1 GN=Nid1 PE=4 SV=1                                                            |
| F1LMB9_RAT | Exocyst complex component 2 GN=Exoc2 PE=4 SV=1                                         |
| F1LMC7_RAT | Septin-7 GN=Sept7 PE=3 SV=2                                                            |
| F1LMI3_RAT | Protein Cdh3 GN=Cdh3 PE=3 SV=2                                                         |
| F1LML7_RAT | Protein Hip1r GN=Hip1r PE=4 SV=1                                                       |
| F1LMM9_RAT | Elongation factor G, mitochondrial GN=Gfm1 PE=4 SV=1                                   |
| F1LMP9_RAT | Disabled homolog 2 GN=Dab2 PE=4 SV=2                                                   |
| F1LMRO_RAT | Protein Itga2 (Fragment) GN=Itga2 PE=3 SV=1                                            |
| F1LMS5_RAT | Thrombospondin-4 (Fragment) GN=Thbs4 PE=4 SV=1                                         |
| F1LMV6_RAT | Protein Dsp GN=Dsp PE=1 SV=1                                                           |
| F1LMW7_RAT | Myristoylated alanine-rich C-kinase substrate GN=Marcks PE=4 SV=2                      |
| F1LMZ9_RAT | Prolyl 3-hydroxylase 1 GN=Lepre1 PE=4 SV=2                                             |
| F1LN18_RAT | Hypoxia up-regulated protein 1 GN=Hyou1 PE=3 SV=1                                      |
| F1LN42_RAT | Protein Tns1 GN=Tns1 PE=4 SV=2                                                         |
| F1LN59_RAT | Protein Eif4g2 (Fragment) GN=Eif4g2 PE=4 SV=2                                          |
| F1LN61_RAT | Uncharacterized protein PE=4 SV=2                                                      |
| F1LN92_RAT | Protein Afg3l2 GN=Afg3l2 PE=3 SV=1                                                     |
| F1LN98_RAT | Uncharacterized protein GN=Ewsr1 PE=4 SV=2                                             |
| F1LNC4_RAT | Vesicle transport through interaction with t-SNAREs homolog 1B GN=RGD1560475 PE=4 SV=2 |
| F1LNF1_RAT | Heterogeneous nuclear ribonucleoproteins A2/B1 (Fragment) GN=Hnrnpa2b1 PE=2 SV=1       |
| F1LNF7_RAT | Isocitrate dehydrogenase [NAD] subunit alpha, mitochondrial GN=ldh3a PE=3 SV=1         |
| F1LNH3_RAT | Procollagen, type VI, alpha 2, isoform CRA_a GN=Col6a2 PE=4 SV=2                       |
| F1LNL2_RAT | Protein Smarca5 GN=Smarca5 PE=4 SV=2                                                   |
| F1LNM0_RAT | Disks large homolog 1 GN=Dlg1 PE=4 SV=1                                                |
| F1LNM3_RAT | Protein Ank3 GN=Ank3 PE=4 SV=2                                                         |
| F1LNN1_RAT | Proteasome subunit beta type GN=Psb3 PE=3 SV=2                                         |
| F1LNT8_RAT | Vesicle-associated membrane protein 8 (Fragment) GN=Vamp8 PE=4 SV=2                    |
| F1LNY3_RAT | Neural cell adhesion molecule 1 (Fragment) GN=Ncam1 PE=4 SV=1                          |
| F1LNZ2_RAT | Protein numb homolog GN=Numb PE=4 SV=2                                                 |
| F1LP05_RAT | ATP synthase subunit alpha GN=Atp5a1 PE=3 SV=1                                         |
| F1LP59_RAT | Rab3 GTPase-activating protein catalytic subunit GN=RGD1306487 PE=4 SV=2               |
| F1LP60_RAT | Moesin (Fragment) GN=Msn PE=4 SV=1                                                     |
| F1LP76_RAT | Elongator complex protein 1 GN=lkbp1 PE=4 SV=2                                         |
| F1LPA7_RAT | CD63 antigen (Fragment) GN=Cd63 PE=2 SV=1                                              |
| F1LPC6_RAT | Carboxypeptidase D GN=Cpd PE=4 SV=2                                                    |
| F1LPD0_RAT | Protein LOC100909752 (Fragment) GN=Col15a1 PE=1 SV=2                                   |
| F1LPE9_RAT | ELKS/Rab6-interacting/CAST family member 1 GN=Erc1 PE=4 SV=1                           |
| F1LPF6_RAT | Sarcoplasmic/endoplasmic reticulum calcium ATPase 2 GN=Atp2a2 PE=3 SV=2                |
| F1LPG2_RAT | Protein Dock8 GN=Dock8 PE=2 SV=2                                                       |
| F1LPG5_RAT | Protein LOC688963 GN=LOC688963 PE=4 SV=1                                               |
| F1LPH1_RAT | Calpastatin GN=Cast PE=2 SV=1                                                          |
| F1LPK7_RAT | Plastin 3 (T-isoform), isoform CRA_a GN=Pls3 PE=4 SV=2                                 |
| F1LPQ6_RAT | Uncharacterized protein (Fragment) PE=4 SV=1                                           |
| F1LPQ7_RAT | Golgin subfamily A member 4 GN=Golga4 PE=4 SV=2                                        |
| F1LPQ9_RAT | A-kinase anchor protein 2 GN=Akap2 PE=1 SV=2                                           |
| F1LPS8_RAT | Transcriptional activator protein Pur-alpha GN=Pura PE=4 SV=2                          |
| F1LPV0_RAT | Protein Nars GN=Nars PE=3 SV=2                                                         |
| F1LPV8_RAT | Protein Suclg2 GN=Suclg2 PE=3 SV=2                                                     |
| F1LPW0_RAT | Uncharacterized protein (Fragment) PE=4 SV=1                                           |
| F1LQ48_RAT | Protein Hnrnp1 GN=Hnrnp1 PE=4 SV=2                                                     |

|            |                                                                                               |
|------------|-----------------------------------------------------------------------------------------------|
| F1LQB2_RAT | Structural maintenance of chromosomes protein 3 GN=Smc3 PE=4 SV=1                             |
| F1LQC1_RAT | Acyl-coenzyme A oxidase GN=Acox1 PE=3 SV=2                                                    |
| F1LQC3_RAT | Collagen alpha-1(XII) chain (Fragment) GN=Col12a1 PE=4 SV=2                                   |
| F1LQD5_RAT | Palladin (Fragment) GN=Palld PE=4 SV=2                                                        |
| F1LQH9_RAT | Protein Bag2 (Fragment) GN=Bag2 PE=4 SV=1                                                     |
| F1LQI1_RAT | Hydroxyacyl glutathione hydrolase GN=Hagh PE=3 SV=2                                           |
| F1LQI5_RAT | E3 ubiquitin-protein ligase UBR4 GN=Ubr4 PE=1 SV=1                                            |
| F1LQJ7_RAT | Protein Pck2 GN=Pck2 PE=3 SV=2                                                                |
| F1LQM9_RAT | Protein Xpo7 GN=Xpo7 PE=1 SV=2                                                                |
| F1LQN3_RAT | Reticulon GN=Rtn4 PE=1 SV=1                                                                   |
| F1LQP9_RAT | Protein Tnp01 (Fragment) GN=Tnp01 PE=4 SV=2                                                   |
| F1LQS3_RAT | 60S ribosomal protein L6 GN=Rpl6 PE=3 SV=1                                                    |
| F1LQS6_RAT | RCG61833 GN=Xdh PE=4 SV=2                                                                     |
| F1LQT3_RAT | Rho-associated protein kinase 2 (Fragment) GN=Rock2 PE=4 SV=2                                 |
| F1LQT4_RAT | Protein Cpn2 GN=Cpn2 PE=4 SV=1                                                                |
| F1LQW0_RAT | Transporter GN=Slc6a2 PE=3 SV=1                                                               |
| F1LQW3_RAT | Protein Sfpq (Fragment) GN=Sfpq PE=4 SV=1                                                     |
| F1LR02_RAT | Procollagen, type XVIII, alpha 1, isoform CRA_a GN=Col18a1 PE=4 SV=2                          |
| F1LR10_RAT | Epithelial protein lost in neoplasm GN=Lima1 PE=1 SV=2                                        |
| F1LR13_RAT | Atlastin-3 GN=Atl3 PE=4 SV=2                                                                  |
| F1LR92_RAT | Serine protease inhibitor A3M (Fragment) GN=Serpina3m PE=3 SV=2                               |
| F1LRA1_RAT | Protein ERGIC-53 GN=Lman1 PE=4 SV=2                                                           |
| F1LRB7_RAT | Tumor susceptibility gene 101 protein GN=Tsg101 PE=4 SV=2                                     |
| F1LRH4_RAT | Protein Lamc2 GN=Lamc2 PE=4 SV=1                                                              |
| F1LRI5_RAT | Protein Gcn1l1 GN=Gcn1l1 PE=4 SV=2                                                            |
| F1LRJ2_RAT | Protein Srrm2 GN=Srrm2 PE=1 SV=2                                                              |
| F1LRK0_RAT | Clathrin coat assembly protein AP180 GN=Snap91 PE=4 SV=2                                      |
| F1LRL9_RAT | Microtubule-associated protein 1B GN=Map1b PE=1 SV=1                                          |
| F1LRP7_RAT | Protein argonaute-2 (Fragment) GN=Ago2 PE=3 SV=1                                              |
| F1LRV4_RAT | Heat shock 70 kDa protein 4 GN=Hspa4 PE=3 SV=1                                                |
| F1LS02_RAT | Nuclear pore complex protein Nup155 GN=Nup155 PE=4 SV=1                                       |
| F1LS40_RAT | Collagen alpha-2(I) chain GN=Col1a2 PE=4 SV=2                                                 |
| F1LS57_RAT | Fibulin 2, isoform CRA_b GN=Fbln2 PE=4 SV=2                                                   |
| F1LS79_RAT | Chondroitin sulfate proteoglycan 4 GN=Cspg4 PE=4 SV=1                                         |
| F1LS86_RAT | Isoleucine-tRNA synthetase (Predicted) GN=lars PE=3 SV=2                                      |
| F1LSD3_RAT | Integrin beta GN=Itgb4 PE=3 SV=1                                                              |
| F1LSE9_RAT | Uncharacterized protein (Fragment) GN=Mrgprg PE=4 SV=2                                        |
| F1LSF8_RAT | Feline leukemia virus subgroup C receptor-related protein 2 GN=Flvcr2 PE=4 SV=2               |
| F1LSL2_RAT | Nuclear pore complex protein Nup107 GN=Nup107 PE=4 SV=2                                       |
| F1LSM8_RAT | Dedicator of cytokinesis protein 9 GN=Dock9 PE=4 SV=2                                         |
| F1LSQ6_RAT | Proteasome subunit alpha type GN=Psm7 PE=3 SV=1                                               |
| F1LSR9_RAT | Alcohol dehydrogenase 1 GN=Adh1 PE=4 SV=2                                                     |
| F1LSS0_RAT | Golgin subfamily A member 2 GN=Golga2 PE=4 SV=2                                               |
| F1LST1_RAT | Uncharacterized protein GN=Fn1 PE=4 SV=2                                                      |
| F1LSU5_RAT | Protein Defa10 GN=Defa10 PE=4 SV=2                                                            |
| F1LSV4_RAT | Protein Sptlc2 GN=Sptlc2 PE=3 SV=2                                                            |
| F1LSW7_RAT | 60S ribosomal protein L14 GN=Rpl14 PE=2 SV=1                                                  |
| F1LT35_RAT | Protein RGD1564606 (Fragment) GN=RGD1564606 PE=3 SV=1                                         |
| F1LT49_RAT | Protein Lrrc47 GN=Lrrc47 PE=1 SV=2                                                            |
| F1LT71_RAT | Echinoderm microtubule associated protein like 4 (Predicted), isoform CRA_a GN=Eml4 PE=4 SV=2 |
| F1LT79_RAT | Aldehyde dehydrogenase GN=Aldh3b2 PE=3 SV=2                                                   |
| F1LTF8_RAT | Protein Lama4 GN=Lama4 PE=4 SV=2                                                              |
| F1LTJ5_RAT | Protein Hspg2 GN=Hspg2 PE=4 SV=2                                                              |
| F1LTQ2_RAT | Uncharacterized protein (Fragment) PE=3 SV=1                                                  |
| F1LTU4_RAT | Protein Mrto4 GN=Mrto4 PE=3 SV=2                                                              |
| F1LTX5_RAT | Protein LOC681066 GN=LOC681066 PE=4 SV=2                                                      |
| F1LTX8_RAT | Protein Lpgat1 GN=Lpgat1 PE=4 SV=2                                                            |
| F1LU48_RAT | Protein Ergic1 (Fragment) GN=Ergic1 PE=4 SV=1                                                 |
| F1LUA1_RAT | Protein Eea1 (Fragment) GN=Eea1 PE=4 SV=1                                                     |
| F1LUA2_RAT | Translocating chain-associated membrane protein GN=LOC100361830 PE=3 SV=2                     |
| F1LV13_RAT | Heterogeneous nuclear ribonucleoprotein M GN=Hnrnpm PE=4 SV=1                                 |



|            |                                                                                                        |
|------------|--------------------------------------------------------------------------------------------------------|
| F1LVA8_RAT | Breast cancer anti-estrogen resistance 1, isoform CRA_a GN=Bcar1 PE=4 SV=2                             |
| F1LW74_RAT | Protein Iqgap2 GN=Iqgap2 PE=4 SV=2                                                                     |
| F1LW91_RAT | Protein Numa1 (Fragment) GN=Numa1 PE=4 SV=1                                                            |
| F1LWE6_RAT | Protein Msi2 (Fragment) GN=Msi2 PE=4 SV=2                                                              |
| F1LWK7_RAT | Protein Ablim1 GN=Ablim1 PE=4 SV=2                                                                     |
| F1LX07_RAT | Protein Slc25a12 (Fragment) GN=Slc25a12 PE=3 SV=2                                                      |
| F1LXA0_RAT | NADH dehydrogenase (Ubiquinone) 1 alpha subcomplex, 12 (Predicted), isoform CRA_b GN=Ndufa12 PE=4 SV=2 |
| F1LY19_RAT | Protein Upf1 GN=Upf1 PE=4 SV=2                                                                         |
| F1LYI5_RAT | Protein RGD1564138 (Fragment) GN=RGD1564138 PE=4 SV=2                                                  |
| F1LYM2_RAT | Ubiquitin-conjugating enzyme E2 D3 (Fragment) GN=Ube2d3 PE=3 SV=2                                      |
| F1LYQ4_RAT | Protein RGD1564515 (Fragment) GN=RGD1564515 PE=4 SV=2                                                  |
| F1LYX9_RAT | Protein Dsg2 (Fragment) GN=Dsg2 PE=3 SV=1                                                              |
| F1LZB6_RAT | Protein NrK GN=Nrk PE=4 SV=2                                                                           |
| F1LZC5_RAT | Protein Ndufa13 (Fragment) GN=Ndufa13 PE=4 SV=1                                                        |
| F1LZW6_RAT | Protein Slc25a13 (Fragment) GN=Slc25a13 PE=3 SV=1                                                      |
| F1LZX9_RAT | Protein Itgav GN=Itgav PE=3 SV=2                                                                       |
| F1M013_RAT | Protein LOC100910109 (Fragment) GN=Rpl7a PE=4 SV=2                                                     |
| F1M062_RAT | Protein Larp1 (Fragment) GN=Larp1 PE=4 SV=2                                                            |
| F1M0U5_RAT | Protein Nbas GN=Nbas PE=4 SV=2                                                                         |
| F1M0V4_RAT | Protein Thoc2 GN=Thoc2 PE=4 SV=2                                                                       |
| F1M0X6_RAT | Protein Magohb GN=Magohb PE=4 SV=2                                                                     |
| F1M0X7_RAT | Protein Ckap5 GN=Ckap5 PE=4 SV=2                                                                       |
| F1M0Y4_RAT | Protein Dst (Fragment) GN=Dst PE=1 SV=2                                                                |
| F1M118_RAT | Protein Dst (Fragment) GN=Dst PE=1 SV=2                                                                |
| F1M124_RAT | Protein Cobll1 (Fragment) GN=Cobll1 PE=1 SV=1                                                          |
| F1M1A6_RAT | Protein LOC681355 GN=LOC681355 PE=4 SV=2                                                               |
| F1M1B3_RAT | Protein RGD1564420 GN=RGD1564420 PE=4 SV=2                                                             |
| F1M1L9_RAT | Protein Cpne2 GN=Cpne2 PE=4 SV=2                                                                       |
| F1M1M6_RAT | Coagulation factor IX GN=F9 PE=3 SV=2                                                                  |
| F1M1U0_RAT | Protein Mxra7 GN=Mxra7 PE=4 SV=2                                                                       |
| F1M201_RAT | Dehydrogenase/reductase SDR family member 7B (Fragment) GN=Dhrs7b PE=3 SV=1                            |
| F1M265_RAT | Palladin (Fragment) GN=Palld PE=4 SV=2                                                                 |
| F1M281_RAT | Calcium-transporting ATPase type 2C member 1 (Fragment) GN=Atp2c1 PE=3 SV=2                            |
| F1M2K6_RAT | Protein Pkp4 GN=Pkp4 PE=4 SV=2                                                                         |
| F1M335_RAT | Protein Pxdn GN=Pxdn PE=4 SV=2                                                                         |
| F1M3D3_RAT | Heterogeneous nuclear ribonucleoprotein M GN=Hnrnmp PE=4 SV=1                                          |
| F1M3H8_RAT | Protein Hnrnpa0 GN=Hnrnpa0 PE=4 SV=2                                                                   |
| F1M3R5_RAT | Protein Pkp4 GN=Pkp4 PE=4 SV=2                                                                         |
| F1M4A0_RAT | Protein Tjp1 GN=Tjp1 PE=1 SV=2                                                                         |
| F1M4T3_RAT | Protein Erh (Fragment) GN=Erh PE=4 SV=1                                                                |
| F1M4W3_RAT | Palladin (Fragment) GN=Palld PE=4 SV=2                                                                 |
| F1M566_RAT | Protein Hspg2 (Fragment) GN=Hspg2 PE=4 SV=2                                                            |
| F1M589_RAT | Protein Pml (Fragment) GN=Pml PE=1 SV=2                                                                |
| F1M5C9_RAT | Ubiquitin-conjugating enzyme E2 D2 (Fragment) GN=Ube2d2 PE=3 SV=1                                      |
| F1M5Q4_RAT | Protein Fbn2 (Fragment) GN=Fbn2 PE=4 SV=2                                                              |
| F1M5T6_RAT | Protein Cobll1 (Fragment) GN=Cobll1 PE=1 SV=1                                                          |
| F1M5V2_RAT | Protein Glipr2 GN=Glipr2 PE=4 SV=2                                                                     |
| F1M5X1_RAT | Protein Rrbp1 GN=Rrbp1 PE=4 SV=2                                                                       |
| F1M5Z5_RAT | Anoctamin GN=Ano6 PE=3 SV=2                                                                            |
| F1M609_RAT | Acyl-coenzyme A oxidase GN=Acox1 PE=3 SV=2                                                             |
| F1M6Q3_RAT | Uncharacterized protein PE=4 SV=2                                                                      |
| F1M6T0_RAT | Protein Fndc3c1 GN=Fndc3c1 PE=4 SV=2                                                                   |
| F1M6T3_RAT | Protein RGD1562037 GN=RGD1562037 PE=4 SV=2                                                             |
| F1M6W2_RAT | Endoplasmic reticulum metalloproteinase 1 GN=Ermp1 PE=4 SV=1                                           |
| F1M6X7_RAT | Rho GTPase-activating protein 17 GN=Arhgap17 PE=4 SV=2                                                 |
| F1M6Z1_RAT | Apolipoprotein B-100 GN=Apob PE=4 SV=1                                                                 |
| F1M779_RAT | Clathrin heavy chain GN=Cltc PE=3 SV=1                                                                 |
| F1M7A0_RAT | DNA topoisomerase 2 (Fragment) GN=Top2a PE=3 SV=2                                                      |
| F1M7E5_RAT | Protein Cdh5 (Fragment) GN=Cdh5 PE=3 SV=1                                                              |
| F1M7F8_RAT | Oxidation resistance protein 1 (Fragment) GN=C7 PE=4 SV=2                                              |
| F1M7L9_RAT | Uncharacterized protein (Fragment) PE=1 SV=2                                                           |

|            |                                                                                               |
|------------|-----------------------------------------------------------------------------------------------|
| F1M7Q5_RAT | AMP deaminase 3 GN=Ampd3 PE=4 SV=2                                                            |
| F1M7X3_RAT | Protein Cdh13 (Fragment) GN=Cdh13 PE=4 SV=2                                                   |
| F1M865_RAT | Sorbin and SH3 domain-containing protein 1 (Fragment) GN=Sorbs1 PE=4 SV=1                     |
| F1M8J7_RAT | Homeobox protein cut-like 1 (Fragment) GN=Cux1 PE=4 SV=2                                      |
| F1M8K0_RAT | Protein Dag1 GN=Dag1 PE=1 SV=1                                                                |
| F1M8K8_RAT | Muscleblind-like protein 2 GN=Mbnl2 PE=4 SV=2                                                 |
| F1M8L5_RAT | Propionyl-CoA carboxylase alpha chain, mitochondrial GN=Pcca PE=4 SV=2                        |
| F1M8W5_RAT | Disintegrin and metalloproteinase domain-containing protein 10 (Fragment) GN=Adam10 PE=4 SV=2 |
| F1M8X9_RAT | Protein Gbf1 GN=Gbf1 PE=4 SV=2                                                                |
| F1M949_RAT | Protein Ckap5 GN=Ckap5 PE=4 SV=2                                                              |
| F1M951_RAT | Tyrosine-protein phosphatase non-receptor type 23 GN=Ptpn23 PE=4 SV=1                         |
| F1M953_RAT | Stress-70 protein, mitochondrial GN=Hspa9 PE=3 SV=1                                           |
| F1M957_RAT | von Willebrand factor (Fragment) GN=Vwf PE=4 SV=2                                             |
| F1M964_RAT | Mitochondrial-processing peptidase subunit alpha GN=Pmpca PE=3 SV=1                           |
| F1M983_RAT | Protein Cfh GN=Cfh PE=4 SV=1                                                                  |
| F1M9B2_RAT | Insulin-like growth factor binding protein 7, isoform CRA_b GN=Igfbp7 PE=4 SV=2               |
| F1M9B5_RAT | Calcium-transporting ATPase type 2C member 1 (Fragment) GN=Atp2c1 PE=3 SV=2                   |
| F1M9D6_RAT | Signal transducer and activator of transcription GN=Stat1 PE=3 SV=2                           |
| F1M9G8_RAT | Histidine triad nucleotide-binding protein 3 GN=Hint3 PE=4 SV=1                               |
| F1M9N7_RAT | Arf-GAP domain and FG repeat-containing protein 1 GN=Agfg1 PE=4 SV=1                          |
| F1M9V7_RAT | Protein Npepps GN=Npepps PE=2 SV=1                                                            |
| F1MA29_RAT | Protein LOC685520 GN=LOC681718 PE=4 SV=1                                                      |
| F1MA37_RAT | Prostasin GN=Prss8 PE=3 SV=2                                                                  |
| F1MA52_RAT | Nuclear RNA export factor 1 GN=Nxf1 PE=4 SV=1                                                 |
| F1MA59_RAT | Protein Col4a1 GN=Col4a1 PE=4 SV=1                                                            |
| F1MAA5_RAT | Protein Rangap1 GN=Rangap1 PE=4 SV=2                                                          |
| F1MAA7_RAT | Protein Lamc1 GN=Lamc1 PE=4 SV=1                                                              |
| F1MAB9_RAT | Protein Tpd52 GN=Tpd52 PE=4 SV=2                                                              |
| F1MAD2_RAT | Protein Inadl GN=Inadl PE=2 SV=1                                                              |
| F1MAK9_RAT | Protein Smpd4 GN=Smpd4 PE=4 SV=2                                                              |
| F1MAN8_RAT | Laminin, alpha 5, isoform CRA_a GN=Lama5 PE=4 SV=2                                            |
| F1MAQ7_RAT | Protein Son GN=Son PE=4 SV=2                                                                  |
| F1SW39_RAT | PC4 and SFRS1 interacting protein 1 GN=Psp1 PE=2 SV=1                                         |
| F213A_RAT  | Redox-regulatory protein FAM213A GN=Fam213a PE=1 SV=1                                         |
| F2Z3Q8_RAT | Importin subunit beta-1 GN=Kpnb1 PE=4 SV=1                                                    |
| F2Z3T8_RAT | Guanine nucleotide-binding protein subunit gamma (Fragment) GN=LOC100360499 PE=3 SV=1         |
| F2Z3T9_RAT | Protein U2af2 GN=U2af2 PE=4 SV=1                                                              |
| F6Q1N1_RAT | Protein F13b GN=F13b PE=4 SV=1                                                                |
| F6SF42_RAT | Protein Krt31 GN=Krt31 PE=3 SV=1                                                              |
| F6T071_RAT | Golgi reassembly-stacking protein 2 (Fragment) GN=Gorasp2 PE=4 SV=1                           |
| F7DLY1_RAT | EPS8-like 2 (Predicted), isoform CRA_d GN=Eps8l2 PE=1 SV=1                                    |
| F7DP80_RAT | Protein Ddx19a GN=Ddx19b PE=4 SV=1                                                            |
| F7EHL9_RAT | Hermansky-Pudlak syndrome 5 protein GN=Hps5 PE=3 SV=1                                         |
| F7EKL8_RAT | UDP-glucose 4-epimerase GN=Gale PE=3 SV=1                                                     |
| F7ELIO_RAT | Protein Drg1 GN=Drg1 PE=4 SV=1                                                                |
| F7EPE0_RAT | Sulfated glycoprotein 1 GN=Psap PE=4 SV=1                                                     |
| F7EPH4_RAT | Protein Ppa1 GN=Ppa1 PE=4 SV=1                                                                |
| F7ERG5_RAT | Protein RT1-A (Fragment) GN=RT1-A PE=3 SV=1                                                   |
| F7ESB6_RAT | Protein Tra2a GN=Tra2a PE=4 SV=1                                                              |
| F7ESN1_RAT | Protein Taf15 GN=Taf15 PE=4 SV=1                                                              |
| F7EVC6_RAT | Protein Hebp1 GN=Hebp1 PE=4 SV=1                                                              |
| F7EWC1_RAT | Protein Vasp GN=Vasp PE=4 SV=1                                                                |
| F7EZ89_RAT | Protein Tbc1d15 GN=Tbc1d15 PE=4 SV=1                                                          |
| F7F1N8_RAT | Protein Usp39 GN=Usp39 PE=4 SV=1                                                              |
| F7F4S8_RAT | Integrin beta GN=Itgb2 PE=3 SV=1                                                              |
| F7F744_RAT | Plectin GN=Plec PE=1 SV=1                                                                     |
| F7FCW3_RAT | Vitamin K-dependent gamma-carboxylase GN=Ggcx PE=4 SV=1                                       |
| F7FEZ6_RAT | Heterogeneous nuclear ribonucleoprotein A1 GN=Hnrnpa1 PE=4 SV=1                               |
| F7FFJ9_RAT | ATP synthase subunit gamma GN=Atp5c1 PE=3 SV=1                                                |
| F7FJR8_RAT | Protein Las1l GN=Las1l PE=4 SV=1                                                              |
| F7FK40_RAT | Tropomyosin 1, alpha, isoform CRA_c GN=Tpm1 PE=3 SV=1                                         |

|            |                                                                                                                    |
|------------|--------------------------------------------------------------------------------------------------------------------|
| F7FLF2_RAT | Protein LOC100360057 (Fragment) GN=LOC100363800 PE=4 SV=1                                                          |
| F7FMD6_RAT | Protein Camlg GN=Camlg PE=4 SV=1                                                                                   |
| F8WFH8_RAT | Tryptophan--tRNA ligase, cytoplasmic GN=Wars PE=3 SV=1                                                             |
| F8WFT7_RAT | Band 3 anion transport protein GN=Slc4a1 PE=4 SV=1                                                                 |
| FA10_RAT   | Coagulation factor X GN=F10 PE=2 SV=1                                                                              |
| FA98A_RAT  | Protein FAM98A GN=Fam98a PE=2 SV=1                                                                                 |
| FABP5_RAT  | Fatty acid-binding protein, epidermal GN=Fabp5 PE=1 SV=3                                                           |
| FABPH_RAT  | Fatty acid-binding protein, heart GN=Fabp3 PE=1 SV=2                                                               |
| FAF2_RAT   | FAS-associated factor 2 GN=Faf2 PE=2 SV=1                                                                          |
| FAM3C_RAT  | Protein FAM3C GN=Fam3c PE=2 SV=1                                                                                   |
| FARP1_RAT  | FERM, RhoGEF and pleckstrin domain-containing protein 1 GN=Farp1 PE=1 SV=2                                         |
| FAS_RAT    | Fatty acid synthase GN=Fasn PE=1 SV=3                                                                              |
| FBRL_RAT   | rRNA 2'-O-methyltransferase fibrillarin GN=Fbl PE=1 SV=2                                                           |
| FBX6_RAT   | F-box only protein 6 GN=Fbxo6 PE=2 SV=1                                                                            |
| FBXW8_RAT  | F-box/WD repeat-containing protein 8 GN=Fbxw8 PE=1 SV=1                                                            |
| FCGRN_RAT  | IgG receptor FcRn large subunit p51 GN=Fcgrt PE=1 SV=1                                                             |
| FETUA_RAT  | Alpha-2-HS-glycoprotein GN=Ahsg PE=1 SV=2                                                                          |
| FETUB_RAT  | Fetuin-B GN=Fetub PE=2 SV=2                                                                                        |
| FGL1_RAT   | Fibrinogen-like protein 1 GN=Fgl1 PE=2 SV=1                                                                        |
| FKBP4_RAT  | Peptidyl-prolyl cis-trans isomerase FKBP4 GN=Fkbp4 PE=1 SV=3                                                       |
| FKBP8_RAT  | Peptidyl-prolyl cis-trans isomerase FKBP8 GN=Fkbp8 PE=2 SV=1                                                       |
| FKBP9_RAT  | Peptidyl-prolyl cis-trans isomerase FKBP9 GN=Fkbp9 PE=2 SV=1                                                       |
| FLVC2_RAT  | Feline leukemia virus subgroup C receptor-related protein 2 GN=Flvcr2 PE=2 SV=1                                    |
| FRIH_RAT   | Ferritin heavy chain GN=Fth1 PE=1 SV=3                                                                             |
| FRIL1_RAT  | Ferritin light chain 1 GN=Ftl1 PE=1 SV=3                                                                           |
| FSCN1_RAT  | Fascin GN=Fscn1 PE=1 SV=2                                                                                          |
| FUBP1_RAT  | Far upstream element-binding protein 1 GN=Fubp1 PE=1 SV=1                                                          |
| FUBP2_RAT  | Far upstream element-binding protein 2 GN=Khsrp PE=1 SV=1                                                          |
| FXR1_RAT   | Fragile X mental retardation syndrome-related protein 1 GN=Fxr1 PE=2 SV=1                                          |
| G3P_RAT    | Glyceraldehyde-3-phosphate dehydrogenase GN=Gapdh PE=1 SV=3                                                        |
| G3V615_RAT | Complement factor B, isoform CRA_b GN=C2 PE=3 SV=1                                                                 |
| G3V624_RAT | Coronin GN=Coro1c PE=3 SV=1                                                                                        |
| G3V632_RAT | Epimorphin, isoform CRA_a GN=Stx2 PE=3 SV=1                                                                        |
| G3V637_RAT | Syntaxin binding protein 2, isoform CRA_b GN=Stxbp2 PE=4 SV=1                                                      |
| G3V640_RAT | Mitochondrial import inner membrane translocase subunit TIM44 GN=Timm44 PE=1 SV=1                                  |
| G3V644_RAT | NADH dehydrogenase (Ubiquinone) flavoprotein 3-like, isoform CRA_a GN=Ndufv3 PE=4 SV=1                             |
| G3V661_RAT | Bromodomain adjacent to zinc finger domain protein 1B GN=Baz1b PE=4 SV=1                                           |
| G3V662_RAT | Nuclear pore complex protein Nup153 GN=Nup153 PE=4 SV=1                                                            |
| G3V667_RAT | Integrin, alpha 6, isoform CRA_a GN=Itga6 PE=3 SV=1                                                                |
| G3V678_RAT | Protein LOC100912534 GN=LOC100912534 PE=4 SV=1                                                                     |
| G3V679_RAT | Transferrin receptor protein 1 GN=Tfrc PE=4 SV=1                                                                   |
| G3V680_RAT | Beta-galactoside alpha-2,6-sialyltransferase 1 GN=St6gal1 PE=1 SV=1                                                |
| G3V699_RAT | Protein transport protein Sec31A GN=Sec31a PE=1 SV=1                                                               |
| G3V6A4_RAT | Heterogeneous nuclear ribonucleoprotein D, isoform CRA_b GN=Hnrpd PE=1 SV=1                                        |
| G3V6A8_RAT | Golgi autoantigen, golgin subfamily b, macrogolgin 1, isoform CRA_c GN=Golgb1 PE=1 SV=1                            |
| G3V6B0_RAT | Protein Pdxdc1 GN=Pdxdc1 PE=3 SV=1                                                                                 |
| G3V6C4_RAT | UDP-glucose 6-dehydrogenase GN=Ugdh PE=3 SV=1                                                                      |
| G3V6D3_RAT | ATP synthase subunit beta GN=Atp5b PE=3 SV=1                                                                       |
| G3V6D9_RAT | Na(+)/H(+) exchange regulatory cofactor NHE-RF2 GN=Slc9a3r2 PE=4 SV=1                                              |
| G3V6E4_RAT | Acyl-Coenzyme A binding domain containing 3 GN=Acbd3 PE=4 SV=1                                                     |
| G3V6H0_RAT | Protein LOC100363782 GN=LOC100363782 PE=3 SV=1                                                                     |
| G3V6H2_RAT | Pre-mRNA processing factor 8, isoform CRA_a GN=Prpf8 PE=4 SV=1                                                     |
| G3V6H7_RAT | Protein LOC100911874 GN=Slc40a1 PE=4 SV=1                                                                          |
| G3V6H9_RAT | Nucleosome assembly protein 1-like 1 GN=Nap1l1 PE=3 SV=1                                                           |
| G3V6I5_RAT | Protein Dnaja3 GN=Dnaja3 PE=3 SV=1                                                                                 |
| G3V6I9_RAT | 60S ribosomal protein L26 GN=Rpl26 PE=3 SV=1                                                                       |
| G3V6J2_RAT | O-acyltransferase GN=Soat1 PE=3 SV=1                                                                               |
| G3V6L8_RAT | RCG61894, isoform CRA_a GN=Strn PE=4 SV=1                                                                          |
| G3V6L9_RAT | Peptidyl-prolyl cis-trans isomerase GN=Fkbp3 PE=4 SV=1                                                             |
| G3V6M8_RAT | Nucleoporin 37 (Predicted), isoform CRA_a GN=Nup37 PE=4 SV=1                                                       |
| G3V6P2_RAT | Dihydroliipoamide S-succinyltransferase (E2 component of 2-oxo-glutarate complex), isoform CRA_a GN=Dlst PE=3 SV=1 |

|            |                                                                                                                   |
|------------|-------------------------------------------------------------------------------------------------------------------|
| G3V6P6_RAT | Putative RNA-binding protein 3 GN=Rbm3 PE=4 SV=1                                                                  |
| G3V6P7_RAT | Myosin, heavy polypeptide 9, non-muscle GN=LOC100911597 PE=4 SV=1                                                 |
| G3V6P8_RAT | Guanine nucleotide-binding protein subunit gamma GN=Gng12 PE=3 SV=1                                               |
| G3V6Q6_RAT | Guanine nucleotide binding protein, alpha 11 GN=Gna11 PE=4 SV=1                                                   |
| G3V6S0_RAT | Protein Sptbn1 GN=Sptbn1 PE=4 SV=2                                                                                |
| G3V6S1_RAT | PRKC apoptosis WT1 regulator protein GN=Pawr PE=4 SV=1                                                            |
| G3V6S3_RAT | Calumenin GN=Calu PE=4 SV=1                                                                                       |
| G3V6S5_RAT | C-1-tetrahydrofolate synthase, cytoplasmic GN=Mthfd1 PE=3 SV=1                                                    |
| G3V6T1_RAT | Protein Copa GN=Copa PE=4 SV=1                                                                                    |
| G3V6T7_RAT | Protein disulfide-isomerase A4 GN=Pdia4 PE=3 SV=1                                                                 |
| G3V6U3_RAT | Asparagine-linked glycosylation 2 homolog (Yeast, alpha-1,3-mannosyltransferase), isoform CRA_a GN=Alg2 PE=4 SV=1 |
| G3V6W2_RAT | Prolactin regulatory element-binding protein GN=Preb PE=4 SV=1                                                    |
| G3V6W6_RAT | Protein Psmc6 GN=Psmc6 PE=3 SV=1                                                                                  |
| G3V6W7_RAT | Cleavage and polyadenylation specificity factor 3, isoform CRA_a GN=Cpsf3 PE=4 SV=1                               |
| G3V6X1_RAT | Fibulin 2, isoform CRA_a GN=Fbln2 PE=4 SV=1                                                                       |
| G3V6Y6_RAT | Phosphorylase GN=Pygb PE=3 SV=1                                                                                   |
| G3V6Y9_RAT | Peptidyl-prolyl cis-trans isomerase G GN=Ppig PE=1 SV=1                                                           |
| G3V6Z3_RAT | Actin filament-associated protein 1 GN=Afap1 PE=4 SV=1                                                            |
| G3V6Z7_RAT | Golgi autoantigen, golgin subfamily a, 5, isoform CRA_a GN=Golga5 PE=4 SV=1                                       |
| G3V702_RAT | Smu-1 suppressor of mec-8 and unc-52 homolog (C. elegans) GN=Smu1 PE=4 SV=1                                       |
| G3V712_RAT | Keratin complex 2, basic, gene 7, isoform CRA_a GN=Krt7 PE=1 SV=1                                                 |
| G3V722_RAT | Beta-1,4-galactosyltransferase 1 GN=B4galt1 PE=4 SV=1                                                             |
| G3V734_RAT | 2,4-dienoyl CoA reductase 1, mitochondrial, isoform CRA_a GN=Decr1 PE=4 SV=1                                      |
| G3V741_RAT | Phosphate carrier protein, mitochondrial GN=Slc25a3 PE=3 SV=1                                                     |
| G3V743_RAT | Glucosidase 1 GN=Mogs PE=4 SV=1                                                                                   |
| G3V752_RAT | Protein Nat10 GN=Nat10 PE=4 SV=1                                                                                  |
| G3V753_RAT | Solute carrier organic anion transporter family member 2A1 GN=Slco2a1 PE=4 SV=1                                   |
| G3V779_RAT | Ladinin (Predicted), isoform CRA_b GN=Lad1 PE=4 SV=1                                                              |
| G3V784_RAT | ADP-dependent glucokinase, isoform CRA_a GN=Adpgk PE=4 SV=1                                                       |
| G3V790_RAT | Transcription activator BRG1 GN=Smarca4 PE=2 SV=2                                                                 |
| G3V796_RAT | Acetyl-Coenzyme A dehydrogenase, medium chain GN=Acadm PE=3 SV=1                                                  |
| G3V798_RAT | Protein Srsf4 GN=Srsf4 PE=4 SV=1                                                                                  |
| G3V7B6_RAT | Phosphatidylglycerophosphatase and protein-tyrosine phosphatase 1 GN=Ptpmt1 PE=4 SV=1                             |
| G3V7C6_RAT | RCG45400 GN=Tubb4b PE=3 SV=1                                                                                      |
| G3V7G8_RAT | Glycine--tRNA ligase GN=Gars PE=3 SV=1                                                                            |
| G3V7G9_RAT | Eukaryotic translation initiation factor 3 subunit L GN=Eif3l PE=2 SV=2                                           |
| G3V7I0_RAT | Peroxiredoxin 3 GN=Prdx3 PE=4 SV=1                                                                                |
| G3V7I3_RAT | ATPase type 13A1 (Predicted), isoform CRA_a GN=Atp13a1 PE=3 SV=1                                                  |
| G3V7I8_RAT | RCG57812, isoform CRA_b GN=Slk PE=4 SV=1                                                                          |
| G3V7J0_RAT | Aldehyde dehydrogenase family 6, subfamily A1, isoform CRA_b GN=Aldh6a1 PE=3 SV=1                                 |
| G3V7J2_RAT | Interferon-inducible double-stranded RNA-dependent protein kinase activator A GN=Prkra PE=1 SV=1                  |
| G3V7K2_RAT | Leukemia inhibitory factor receptor GN=Lifr PE=4 SV=1                                                             |
| G3V7K3_RAT | Ceruloplasmin GN=Cp PE=4 SV=1                                                                                     |
| G3V7K5_RAT | Protein Npc1 GN=Npc1 PE=4 SV=1                                                                                    |
| G3V7L0_RAT | Adrenodoxin, mitochondrial GN=Fdx1 PE=4 SV=1                                                                      |
| G3V7L1_RAT | Protein Utrn GN=Utrn PE=1 SV=2                                                                                    |
| G3V7L6_RAT | 26S protease regulatory subunit 7 GN=Psmc2 PE=3 SV=1                                                              |
| G3V7L8_RAT | ATPase, H+ transporting, V1 subunit E isoform 1, isoform CRA_a GN=Atp6v1e1 PE=3 SV=1                              |
| G3V7M0_RAT | Protein Cnot1 GN=Cnot1 PE=4 SV=1                                                                                  |
| G3V7N0_RAT | Heparan sulfate 2-O-sulfotransferase 1, isoform CRA_a GN=Hs2st1 PE=4 SV=1                                         |
| G3V7N8_RAT | Galectin GN=Lgals9 PE=4 SV=1                                                                                      |
| G3V7Q6_RAT | Proteasome subunit beta type GN=Psmb5 PE=3 SV=1                                                                   |
| G3V7Q7_RAT | IQ motif containing GTPase activating protein 1 (Predicted), isoform CRA_b GN=Iqgap1 PE=4 SV=1                    |
| G3V7T6_RAT | Protein Sf3b1 GN=Sf3b1 PE=4 SV=1                                                                                  |
| G3V7U2_RAT | Microtubule-associated protein 1 A, isoform CRA_c GN=Map1a PE=4 SV=1                                              |
| G3V7U4_RAT | Lamin-B1 GN=Lmnb1 PE=3 SV=1                                                                                       |
| G3V7U8_RAT | Actin-related protein 2/3 complex subunit 5 GN=Arpc5l PE=3 SV=1                                                   |
| G3V7V3_RAT | Protein Slc27a4 GN=Slc27a4 PE=4 SV=1                                                                              |
| G3V7V4_RAT | Ectonucleotide pyrophosphatase/phosphodiesterase family member 1 GN=Enpp1 PE=1 SV=2                               |
| G3V7V5_RAT | Peptidyl-prolyl cis-trans isomerase GN=Fkbp11 PE=4 SV=1                                                           |
| G3V7V6_RAT | All-trans-13,14-dihydroretinol saturase, isoform CRA_b GN=Retsat PE=4 SV=1                                        |

|            |                                                                                                         |
|------------|---------------------------------------------------------------------------------------------------------|
| G3V7W1_RAT | Programmed cell death 6 (Predicted), isoform CRA_a GN=Pdcd6 PE=4 SV=1                                   |
| G3V7W7_RAT | Alanyl (Membrane) aminopeptidase GN=Anpep PE=4 SV=1                                                     |
| G3V7Y3_RAT | ATP synthase subunit delta, mitochondrial GN=Atp5d PE=3 SV=1                                            |
| G3V7Y9_RAT | Alpha-mannosidase 2 GN=Man2a1 PE=4 SV=1                                                                 |
| G3V7Z8_RAT | Poly(A) binding protein, nuclear 1, isoform CRA_a GN=Pabpn1 PE=4 SV=1                                   |
| G3V811_RAT | Coagulation factor XIII A chain GN=F13a1 PE=3 SV=1                                                      |
| G3V818_RAT | Alpha-parvin GN=Parva PE=4 SV=1                                                                         |
| G3V824_RAT | Insulin-like growth factor 2 receptor, isoform CRA_b GN=Igf2r PE=4 SV=1                                 |
| G3V826_RAT | Transketolase GN=Tkt PE=3 SV=1                                                                          |
| G3V828_RAT | Protein Cnpy3 GN=Cnpy3 PE=4 SV=1                                                                        |
| G3V829_RAT | Protein Fubp3 GN=Fubp3 PE=4 SV=1                                                                        |
| G3V834_RAT | Protein PRRC1 GN=Prrc1 PE=4 SV=1                                                                        |
| G3V836_RAT | Clusterin GN=Clu PE=3 SV=1                                                                              |
| G3V843_RAT | Prothrombin GN=F2 PE=3 SV=1                                                                             |
| G3V850_RAT | Prolactin-7A2 GN=Prl7a3 PE=3 SV=1                                                                       |
| G3V852_RAT | Protein Tln1 GN=Tln1 PE=1 SV=1                                                                          |
| G3V862_RAT | Angiopoietin-like 2 GN=Angptl2 PE=4 SV=1                                                                |
| G3V863_RAT | Prolactin-8A4 GN=Prl8a4 PE=4 SV=1                                                                       |
| G3V866_RAT | Prolactin-8A5 GN=Prl8a5 PE=3 SV=1                                                                       |
| G3V869_RAT | Prolactin-8A7 GN=Prl8a7 PE=4 SV=1                                                                       |
| G3V874_RAT | Erythrocyte protein band 4.1-like 3, isoform CRA_b GN=Epb41l3 PE=4 SV=1                                 |
| G3V878_RAT | Sec11-like 3 (S. cerevisiae), isoform CRA_c GN=Sec11c PE=4 SV=1                                         |
| G3V887_RAT | Protein Tcirg1 GN=Tcirg1 PE=4 SV=1                                                                      |
| G3V8A5_RAT | Vacuolar protein sorting-associated protein 35 GN=Vps35 PE=3 SV=1                                       |
| G3V8B3_RAT | Histone H2B GN=Hist1h2bcl1 PE=3 SV=1                                                                    |
| G3V8B6_RAT | 26S proteasome non-ATPase regulatory subunit 1 GN=Psm1 PE=4 SV=1                                        |
| G3V8C4_RAT | Chloride intracellular channel 4, isoform CRA_b GN=Clic4 PE=4 SV=1                                      |
| G3V8D4_RAT | Apolipoprotein C-II (Predicted) GN=Apoc2 PE=4 SV=1                                                      |
| G3V8F5_RAT | Mitochondrial import receptor subunit TOM40 homolog GN=Tomm40 PE=4 SV=1                                 |
| G3V8G2_RAT | Proteasome (Prosome, macropain) 26S subunit, non-ATPase, 5 (Predicted), isoform CRA_a GN=Psm5 PE=4 SV=1 |
| G3V8G5_RAT | Golgi apparatus protein 1 GN=Glg1 PE=4 SV=1                                                             |
| G3V8L3_RAT | Lamin A, isoform CRA_b GN=Lmna PE=1 SV=1                                                                |
| G3V8L9_RAT | Polymerase I and transcript release factor GN=Ptrf PE=4 SV=1                                            |
| G3V8M5_RAT | Protein phosphatase 4, catalytic subunit, isoform CRA_a GN=Ppp4c PE=4 SV=1                              |
| G3V8M6_RAT | Folate receptor 1 (Adult), isoform CRA_b GN=Folr1 PE=4 SV=1                                             |
| G3V8Q1_RAT | Protein Cope GN=Cope PE=4 SV=2                                                                          |
| G3V8Q6_RAT | Protein kinase, cAMP-dependent, regulatory, type 2, alpha, isoform CRA_a GN=Prkar2a PE=1 SV=1           |
| G3V8Q8_RAT | Protein Sec23ip GN=Sec23ip PE=4 SV=1                                                                    |
| G3V8R3_RAT | Protein Hbz GN=Hbz PE=3 SV=1                                                                            |
| G3V8R9_RAT | Protein YIF1B GN=Yif1b PE=4 SV=1                                                                        |
| G3V8S9_RAT | Cathelicidin antimicrobial peptide GN=Camp PE=4 SV=1                                                    |
| G3V8T4_RAT | DNA damage-binding protein 1 GN=Ddb1 PE=4 SV=1                                                          |
| G3V8T5_RAT | Protein Ruvbl2 GN=Ruvbl2 PE=4 SV=1                                                                      |
| G3V8U8_RAT | Branched-chain-amino-acid aminotransferase GN=Bcat2 PE=3 SV=1                                           |
| G3V8U9_RAT | Proteasome subunit beta type GN=Psb4 PE=3 SV=1                                                          |
| G3V8V1_RAT | Granulin, isoform CRA_c GN=Grn PE=4 SV=1                                                                |
| G3V8V4_RAT | Longevity assurance homolog 2 (S. cerevisiae) GN=Cers2 PE=3 SV=1                                        |
| G3V8W2_RAT | Phosphatidate cytidyltransferase GN=Cds2 PE=3 SV=1                                                      |
| G3V8Y5_RAT | DNA-directed RNA polymerase GN=Polr2b PE=3 SV=1                                                         |
| G3V8Y8_RAT | Huntingtin interacting protein 1, isoform CRA_a GN=Hip1 PE=4 SV=1                                       |
| G3V907_RAT | Protein LOC100911356 GN=LOC100360976 PE=4 SV=1                                                          |
| G3V912_RAT | Protein Tmx4 GN=Tmx4 PE=4 SV=1                                                                          |
| G3V913_RAT | Heat shock 27kDa protein 1 GN=Hspb1 PE=1 SV=1                                                           |
| G3V918_RAT | Phosphoribosylglycinamide formyltransferase, isoform CRA_a GN=Gart PE=3 SV=1                            |
| G3V925_RAT | Pregnancy-specific beta 1-glycoprotein, isoform CRA_b GN=Psgb1 PE=4 SV=1                                |
| G3V928_RAT | Protein Lrp1 GN=Lrp1 PE=4 SV=1                                                                          |
| G3V936_RAT | Citrate synthase GN=Cs PE=3 SV=1                                                                        |
| G3V940_RAT | Coronin GN=Coro1b PE=3 SV=1                                                                             |
| G3V949_RAT | CAP-Gly domain-containing linker protein 2 GN=Clip2 PE=4 SV=1                                           |
| G3V985_RAT | Protein Sco1 GN=Sco1 PE=4 SV=1                                                                          |
| G3V9A3_RAT | Protein LOC679816 GN=Sfn PE=3 SV=1                                                                      |

|            |                                                                                            |
|------------|--------------------------------------------------------------------------------------------|
| G3V9D1_RAT | 1-phosphatidylinositol 4,5-bisphosphate phosphodiesterase delta-1 GN=Plcd1 PE=4 SV=1       |
| G3V9D3_RAT | Protein sel-1 homolog 1 GN=Sel1l PE=4 SV=1                                                 |
| G3V9E3_RAT | Caldesmon 1, isoform CRA_b GN=Cald1 PE=4 SV=1                                              |
| G3V9E4_RAT | Acylamino-acid-releasing enzyme GN=Apeh PE=4 SV=1                                          |
| G3V9F3_RAT | Myosin phosphatase Rho-interacting protein GN=Mrip PE=4 SV=1                               |
| G3V9F8_RAT | Protein Ctsm GN=Ctsm PE=3 SV=2                                                             |
| G3V9G2_RAT | Heterogeneous nuclear ribonucleoprotein D, isoform CRA_a GN=Hnrpd PE=1 SV=1                |
| G3V9H6_RAT | Protein Ppfibp2 GN=Ppfibp2 PE=4 SV=1                                                       |
| G3V9J6_RAT | Protein Abcb1b GN=Abcb1b PE=3 SV=1                                                         |
| G3V9M1_RAT | DEAD (Asp-Glu-Ala-Asp) box polypeptide 23 (Predicted), isoform CRA_b GN=Ddx23 PE=3 SV=1    |
| G3V9M6_RAT | Fibrillin 1, isoform CRA_a GN=Fbn1 PE=4 SV=1                                               |
| G3V9N0_RAT | Pabpc4 protein GN=Pabpc4 PE=2 SV=2                                                         |
| G3V9N1_RAT | RCG21137 GN=Pgam5 PE=4 SV=1                                                                |
| G3V9N7_RAT | Protein Pacsin3 GN=Pacsin3 PE=4 SV=2                                                       |
| G3V9N8_RAT | AP-1 complex subunit beta-1 GN=Ap1b1 PE=4 SV=2                                             |
| G3V9P5_RAT | Protein Psg19 GN=Psg19 PE=4 SV=2                                                           |
| G3V9P6_RAT | Uncharacterized protein (Fragment) GN=Psg19 PE=4 SV=2                                      |
| G3V9Q3_RAT | Heterogeneous nuclear ribonucleoprotein H GN=Hnrph1 PE=4 SV=1                              |
| G3V9Q7_RAT | Cathepsin G GN=Ctsg PE=3 SV=1                                                              |
| G3V9R2_RAT | Protein Cfh GN=Cfh PE=4 SV=1                                                               |
| G3V9R8_RAT | Heterogeneous nuclear ribonucleoprotein C (C1/C2) GN=Hnrnpc PE=1 SV=2                      |
| G3V9R9_RAT | Afamin GN=Afm PE=4 SV=1                                                                    |
| G3V9S0_RAT | Cytochrome b5 reductase 1 GN=Cyb5r1 PE=4 SV=1                                              |
| G3V9S9_RAT | Protein Sec24d GN=Sec24d PE=2 SV=2                                                         |
| G3V9T7_RAT | ATPase Asna1 GN=Asna1 PE=3 SV=1                                                            |
| G3V9T9_RAT | Tyrosine-protein phosphatase non-receptor type GN=Ptpn6 PE=3 SV=1                          |
| G3V9U7_RAT | ATPase, Ca++ transporting, ubiquitous, isoform CRA_b GN=Atp2a3 PE=3 SV=1                   |
| G3V9W2_RAT | Tyrosine-protein kinase GN=Jak1 PE=3 SV=1                                                  |
| G3V9W6_RAT | Aldehyde dehydrogenase GN=Aldh3a2 PE=3 SV=1                                                |
| G3V9X2_RAT | G-protein signalling modulator 1 (AGS3-like, C. elegans), isoform CRA_c GN=Gpsm1 PE=4 SV=1 |
| G3V9X8_RAT | Magnesium transporter protein 1 GN=Magt1 PE=4 SV=2                                         |
| G3V9Y1_RAT | Myosin, heavy polypeptide 10, non-muscle, isoform CRA_b GN=Myh10 PE=4 SV=1                 |
| G3V9Z3_RAT | Amine oxidase [flavin-containing] A GN=Maoa PE=4 SV=1                                      |
| G3V9Z6_RAT | Septin 8 (Predicted) GN=Sept8 PE=3 SV=1                                                    |
| G6PD_RAT   | Glucose-6-phosphate 1-dehydrogenase GN=G6pdx PE=1 SV=3                                     |
| G6PI_RAT   | Glucose-6-phosphate isomerase GN=Gpi PE=1 SV=1                                             |
| GALT1_RAT  | Polypeptide N-acetylgalactosaminyltransferase 1 GN=Galnt1 PE=1 SV=1                        |
| GAR1_RAT   | H/ACA ribonucleoprotein complex subunit 1 GN=Gar1 PE=2 SV=1                                |
| GATM_RAT   | Glycine amidinotransferase, mitochondrial GN=Gatm PE=1 SV=1                                |
| GBB1_RAT   | Guanine nucleotide-binding protein G(i)/G(s)/G(t) subunit beta-1 GN=Gnb1 PE=1 SV=4         |
| GBB2_RAT   | Guanine nucleotide-binding protein G(i)/G(s)/G(t) subunit beta-2 GN=Gnb2 PE=1 SV=4         |
| GBG5_RAT   | Guanine nucleotide-binding protein G(i)/G(s)/G(o) subunit gamma-5 GN=Gng5 PE=3 SV=1        |
| GBLP_RAT   | Guanine nucleotide-binding protein subunit beta-2-like 1 GN=Gnb2l1 PE=1 SV=3               |
| GDIA_RAT   | Rab GDP dissociation inhibitor alpha GN=Gdi1 PE=1 SV=1                                     |
| GDIB_RAT   | Rab GDP dissociation inhibitor beta GN=Gdi2 PE=1 SV=2                                      |
| GDIR1_RAT  | Rho GDP-dissociation inhibitor 1 GN=Arhgdia PE=1 SV=1                                      |
| GFPT1_RAT  | Glutamine--fructose-6-phosphate aminotransferase [isomerizing] 1 GN=Gfpt1 PE=1 SV=3        |
| GHITM_RAT  | Growth hormone-inducible transmembrane protein GN=Ghitm PE=2 SV=1                          |
| GIPC1_RAT  | PDZ domain-containing protein GIPC1 GN=Gipc1 PE=1 SV=2                                     |
| GLOD4_RAT  | Glyoxalase domain-containing protein 4 GN=Glod4 PE=1 SV=1                                  |
| GLYR1_RAT  | Putative oxidoreductase GLYR1 GN=Glyr1 PE=2 SV=1                                           |
| GMFB_RAT   | Glia maturation factor beta GN=Gmfb PE=1 SV=2                                              |
| GNA11_RAT  | Guanine nucleotide-binding protein subunit alpha-11 GN=Gna11 PE=2 SV=1                     |
| GNA13_RAT  | Guanine nucleotide-binding protein subunit alpha-13 GN=Gna13 PE=1 SV=1                     |
| GNAI2_RAT  | Guanine nucleotide-binding protein G(i) subunit alpha-2 GN=Gnai2 PE=1 SV=3                 |
| GNAI3_RAT  | Guanine nucleotide-binding protein G(k) subunit alpha GN=Gnai3 PE=1 SV=3                   |
| GNL3_RAT   | Guanine nucleotide-binding protein-like 3 GN=Gnl3 PE=1 SV=1                                |
| GOGA2_RAT  | Golgin subfamily A member 2 GN=Golga2 PE=1 SV=3                                            |
| GOGA4_RAT  | Golgin subfamily A member 4 GN=Golga4 PE=1 SV=2                                            |
| GOLP3_RAT  | Golgi phosphoprotein 3 GN=Golph3 PE=1 SV=1                                                 |
| GOSR1_RAT  | Golgi SNAP receptor complex member 1 GN=Gosr1 PE=1 SV=1                                    |

|            |                                                                                       |
|------------|---------------------------------------------------------------------------------------|
| GOSR2_RAT  | Golgi SNAP receptor complex member 2 GN=Gosr2 PE=1 SV=2                               |
| GP116_RAT  | Probable G-protein coupled receptor 116 GN=Gpr116 PE=1 SV=1                           |
| GPAT3_RAT  | Glycerol-3-phosphate acyltransferase 3 GN=Agpat9 PE=2 SV=1                            |
| GPDM_RAT   | Glycerol-3-phosphate dehydrogenase, mitochondrial GN=Gpd2 PE=1 SV=1                   |
| GPX1_RAT   | Glutathione peroxidase 1 GN=Gpx1 PE=1 SV=4                                            |
| GPX3_RAT   | Glutathione peroxidase 3 GN=Gpx3 PE=2 SV=2                                            |
| GRB10_RAT  | Growth factor receptor-bound protein 10 GN=Grb10 PE=3 SV=1                            |
| GRP78_RAT  | 78 kDa glucose-regulated protein GN=Hspa5 PE=1 SV=1                                   |
| GRPE1_RAT  | GrpE protein homolog 1, mitochondrial GN=Grpel1 PE=1 SV=2                             |
| GSTP1_RAT  | Glutathione S-transferase P GN=Gstp1 PE=1 SV=2                                        |
| GTR1_RAT   | Solute carrier family 2, facilitated glucose transporter member 1 GN=Slc2a1 PE=1 SV=1 |
| GTR3_RAT   | Solute carrier family 2, facilitated glucose transporter member 3 GN=Slc2a3 PE=1 SV=1 |
| GYS1_RAT   | Glycogen [starch] synthase, muscle GN=Gys1 PE=2 SV=1                                  |
| H10_RAT    | Histone H1.0 GN=H1f0 PE=2 SV=2                                                        |
| H11_RAT    | Histone H1.1 GN=Hist1h1a PE=3 SV=1                                                    |
| H14_RAT    | Histone H1.4 GN=Hist1h1e PE=1 SV=3                                                    |
| H15_RAT    | Histone H1.5 GN=Hist1h1b PE=3 SV=1                                                    |
| H2A2A_RAT  | Histone H2A type 2-A GN=Hist2h2aa3 PE=1 SV=1                                          |
| H2AZ_RAT   | Histone H2A.Z GN=H2afz PE=1 SV=2                                                      |
| H7C5Y5_RAT | 60S ribosomal protein L6 GN=Rpl6 PE=3 SV=1                                            |
| H9KVF3_RAT | Serine/threonine-protein kinase 24 (Fragment) GN=Stk24 PE=4 SV=1                      |
| H9KVF6_RAT | Serine/threonine-protein kinase 10 GN=Stk10 PE=4 SV=2                                 |
| HA12_RAT   | RT1 class I histocompatibility antigen, AA alpha chain PE=1 SV=2                      |
| HAP28_RAT  | 28 kDa heat- and acid-stable phosphoprotein GN=Pdap1 PE=1 SV=1                        |
| HBA_RAT    | Hemoglobin subunit alpha-1/2 GN=Hba1 PE=1 SV=3                                        |
| HBB1_RAT   | Hemoglobin subunit beta-1 GN=Hbb PE=1 SV=3                                            |
| HBB2_RAT   | Hemoglobin subunit beta-2 PE=1 SV=2                                                   |
| HCD2_RAT   | 3-hydroxyacyl-CoA dehydrogenase type-2 GN=Hsd17b10 PE=1 SV=3                          |
| HCDH_RAT   | Hydroxyacyl-coenzyme A dehydrogenase, mitochondrial GN=Hadh PE=2 SV=1                 |
| HDAC1_RAT  | Histone deacetylase 1 GN=Hdac1 PE=1 SV=1                                              |
| HEM2_RAT   | Delta-aminolevulinic acid dehydratase GN=Alad PE=1 SV=1                               |
| HEM6_RAT   | Oxygen-dependent coproporphyrinogen-III oxidase, mitochondrial GN=Cpox PE=2 SV=1      |
| HEMO_RAT   | Hemopexin GN=Hpx PE=1 SV=3                                                            |
| HEP2_RAT   | Heparin cofactor 2 GN=Serpind1 PE=2 SV=1                                              |
| HEXA_RAT   | Beta-hexosaminidase subunit alpha GN=Hexa PE=2 SV=1                                   |
| HEXB_RAT   | Beta-hexosaminidase subunit beta GN=Hexb PE=2 SV=1                                    |
| HINT3_RAT  | Histidine triad nucleotide-binding protein 3 GN=Hint3 PE=2 SV=2                       |
| HMGB1_RAT  | High mobility group protein B1 GN=Hmgb1 PE=1 SV=2                                     |
| HMGB2_RAT  | High mobility group protein B2 GN=Hmgb2 PE=2 SV=2                                     |
| HMGCL_RAT  | Hydroxymethylglutaryl-CoA lyase, mitochondrial GN=Hmgcl PE=2 SV=1                     |
| HMGNS5_RAT | High mobility group nucleosome-binding domain-containing protein 5 GN=Hmgn5 PE=2 SV=1 |
| HMOX1_RAT  | Heme oxygenase 1 GN=Hmox1 PE=1 SV=1                                                   |
| HMOX2_RAT  | Heme oxygenase 2 GN=Hmox2 PE=1 SV=1                                                   |
| HNRDL_RAT  | Heterogeneous nuclear ribonucleoprotein D-like GN=Hnrnpdl PE=2 SV=1                   |
| HNRH2_RAT  | Heterogeneous nuclear ribonucleoprotein H2 GN=Hnrnp2 PE=1 SV=1                        |
| HNRPF_RAT  | Heterogeneous nuclear ribonucleoprotein F GN=Hnrnpf PE=1 SV=3                         |
| HNRPK_RAT  | Heterogeneous nuclear ribonucleoprotein K GN=Hnrnpk PE=1 SV=1                         |
| HNRPQ_RAT  | Heterogeneous nuclear ribonucleoprotein Q GN=Syncrip PE=2 SV=1                        |
| HP1B3_RAT  | Heterochromatin protein 1-binding protein 3 GN=Hp1bp3 PE=2 SV=1                       |
| HPCL1_RAT  | Hippocalcin-like protein 1 GN=Hpcal1 PE=1 SV=2                                        |
| HPRT_RAT   | Hypoxanthine-guanine phosphoribosyltransferase GN=Hprt1 PE=1 SV=1                     |
| HRG_RAT    | Histidine-rich glycoprotein GN=Hrg PE=2 SV=1                                          |
| HS105_RAT  | Heat shock protein 105 kDa GN=Hsph1 PE=2 SV=1                                         |
| HS90A_RAT  | Heat shock protein HSP 90-alpha GN=Hsp90aa1 PE=1 SV=3                                 |
| HS90B_RAT  | Heat shock protein HSP 90-beta GN=Hsp90ab1 PE=1 SV=4                                  |
| HSDL2_RAT  | Hydroxysteroid dehydrogenase-like protein 2 GN=Hsd12 PE=2 SV=1                        |
| HSP13_RAT  | Heat shock 70 kDa protein 13 GN=Hspa13 PE=2 SV=2                                      |
| HSP71_RAT  | Heat shock 70 kDa protein 1A/1B GN=Hspa1a PE=2 SV=2                                   |
| HSP74_RAT  | Heat shock 70 kDa protein 4 GN=Hspa4 PE=1 SV=1                                        |
| HSP7C_RAT  | Heat shock cognate 71 kDa protein GN=Hspa8 PE=1 SV=1                                  |
| HSPB1_RAT  | Heat shock protein beta-1 GN=Hspb1 PE=1 SV=1                                          |

|            |                                                                                     |
|------------|-------------------------------------------------------------------------------------|
| HSPB8_RAT  | Heat shock protein beta-8 GN=Hspb8 PE=1 SV=1                                        |
| HTRA1_RAT  | Serine protease HTRA1 GN=Htra1 PE=2 SV=1                                            |
| HXX1_RAT   | Hexokinase-1 GN=Hk1 PE=1 SV=4                                                       |
| HXX2_RAT   | Hexokinase-2 GN=Hk2 PE=1 SV=1                                                       |
| I6L9G6_RAT | Protein Tardbp GN=Tardbp PE=2 SV=1                                                  |
| IBP2_RAT   | Insulin-like growth factor-binding protein 2 GN=Igf2bp2 PE=1 SV=3                   |
| IC1_RAT    | Plasma protease C1 inhibitor GN=Serp1 PE=2 SV=1                                     |
| ICAM1_RAT  | Intercellular adhesion molecule 1 GN=Icam1 PE=2 SV=1                                |
| IDH3A_RAT  | Isocitrate dehydrogenase [NAD] subunit alpha, mitochondrial GN=Idh3a PE=1 SV=1      |
| IDH3B_RAT  | Isocitrate dehydrogenase [NAD] subunit beta, mitochondrial GN=Idh3B PE=1 SV=1       |
| IDH3G_RAT  | Isocitrate dehydrogenase [NAD] subunit gamma 1, mitochondrial GN=Idh3g PE=2 SV=2    |
| IDHP_RAT   | Isocitrate dehydrogenase [NADP], mitochondrial GN=Idh2 PE=1 SV=2                    |
| IF2A_RAT   | Eukaryotic translation initiation factor 2 subunit 1 GN=Eif2s1 PE=1 SV=2            |
| IF2B1_RAT  | Insulin-like growth factor 2 mRNA-binding protein 1 GN=Igf2bp1 PE=1 SV=1            |
| IF2G_RAT   | Eukaryotic translation initiation factor 2 subunit 3 GN=Eif2s3 PE=1 SV=2            |
| IF2P_RAT   | Eukaryotic translation initiation factor 5B GN=Eif5b PE=1 SV=1                      |
| IF4A2_RAT  | Eukaryotic initiation factor 4A-II GN=Eif4a2 PE=1 SV=1                              |
| IF4A3_RAT  | Eukaryotic initiation factor 4A-III GN=Eif4a3 PE=1 SV=1                             |
| IF4E_RAT   | Eukaryotic translation initiation factor 4E GN=Eif4e PE=1 SV=1                      |
| IF4H_RAT   | Eukaryotic translation initiation factor 4H GN=Eif4h PE=1 SV=1                      |
| IF5A1_RAT  | Eukaryotic translation initiation factor 5A-1 GN=Eif5a PE=1 SV=3                    |
| IF5_RAT    | Eukaryotic translation initiation factor 5 GN=Eif5 PE=1 SV=1                        |
| IF6_RAT    | Eukaryotic translation initiation factor 6 GN=Eif6 PE=2 SV=1                        |
| IGF2_RAT   | Insulin-like growth factor II GN=Igf2 PE=1 SV=1                                     |
| IGG2A_RAT  | Ig gamma-2A chain C region GN=Igg-2a PE=1 SV=1                                      |
| IGG2B_RAT  | Ig gamma-2B chain C region GN=Igh-1a PE=1 SV=1                                      |
| IGG2C_RAT  | Ig gamma-2C chain C region PE=2 SV=1                                                |
| IGHG1_RAT  | Ig gamma-1 chain C region PE=1 SV=1                                                 |
| ILF2_RAT   | Interleukin enhancer-binding factor 2 GN=Ilf2 PE=2 SV=1                             |
| ILK_RAT    | Integrin-linked protein kinase GN=Ilk PE=2 SV=1                                     |
| IMA5_RAT   | Importin subunit alpha-5 GN=Kpna1 PE=1 SV=1                                         |
| IMDH2_RAT  | Inosine-5'-monophosphate dehydrogenase 2 GN=Impdh2 PE=3 SV=1                        |
| IMMT_RAT   | Mitochondrial inner membrane protein (Fragment) GN=Immt PE=1 SV=1                   |
| IMPA3_RAT  | Inositol monophosphatase 3 GN=Impad1 PE=3 SV=1                                      |
| INO1_RAT   | Inositol-3-phosphate synthase 1 GN=Isyna1 PE=3 SV=2                                 |
| ITA1_RAT   | Integrin alpha-1 GN=Itga1 PE=1 SV=1                                                 |
| ITB1_RAT   | Integrin beta-1 GN=Itgb1 PE=2 SV=1                                                  |
| ITB4_RAT   | Integrin beta-4 GN=Itgb4 PE=2 SV=1                                                  |
| ITIH3_RAT  | Inter-alpha-trypsin inhibitor heavy chain H3 GN=Itih3 PE=2 SV=1                     |
| ITM2B_RAT  | Integral membrane protein 2B GN=Itm2b PE=2 SV=1                                     |
| ITPA_RAT   | Inosine triphosphate pyrophosphatase GN=Itpa PE=3 SV=1                              |
| ITPR3_RAT  | Inositol 1,4,5-trisphosphate receptor type 3 GN=Itpr3 PE=1 SV=1                     |
| IVD_RAT    | Isovaleryl-CoA dehydrogenase, mitochondrial GN=Ivd PE=1 SV=2                        |
| JAGN1_RAT  | Protein jagunal homolog 1 GN=Jagn1 PE=2 SV=1                                        |
| JAM1_RAT   | Junctional adhesion molecule A GN=F11r PE=2 SV=1                                    |
| K1C10_RAT  | Keratin, type I cytoskeletal 10 GN=Krt10 PE=3 SV=1                                  |
| K1C18_RAT  | Keratin, type I cytoskeletal 18 GN=Krt18 PE=1 SV=3                                  |
| K1C19_RAT  | Keratin, type I cytoskeletal 19 GN=Krt19 PE=1 SV=2                                  |
| K22E_RAT   | Keratin, type II cytoskeletal 2 epidermal GN=Krt2 PE=3 SV=1                         |
| K2C1_RAT   | Keratin, type II cytoskeletal 1 GN=Krt1 PE=2 SV=1                                   |
| K2C5_RAT   | Keratin, type II cytoskeletal 5 GN=Krt5 PE=1 SV=1                                   |
| K2C6A_RAT  | Keratin, type II cytoskeletal 6A GN=Krt6a PE=1 SV=1                                 |
| K2C8_RAT   | Keratin, type II cytoskeletal 8 GN=Krt8 PE=1 SV=3                                   |
| K6PL_RAT   | 6-phosphofructokinase, liver type GN=Pfkl PE=2 SV=3                                 |
| K6PP_RAT   | 6-phosphofructokinase type C GN=Pfkp PE=1 SV=2                                      |
| KACB_RAT   | Ig kappa chain C region, B allele PE=1 SV=1                                         |
| KAD4_RAT   | Adenylate kinase 4, mitochondrial GN=Ak4 PE=2 SV=1                                  |
| KAP0_RAT   | cAMP-dependent protein kinase type I-alpha regulatory subunit GN=Prkar1a PE=2 SV=2  |
| KAP2_RAT   | cAMP-dependent protein kinase type II-alpha regulatory subunit GN=Prkar2a PE=1 SV=3 |
| KCC1A_RAT  | Calcium/calmodulin-dependent protein kinase type 1 GN=Camk1 PE=1 SV=2               |
| KCJ13_RAT  | Inward rectifier potassium channel 13 GN=Kcnj13 PE=2 SV=1                           |



|            |                                                                                                  |
|------------|--------------------------------------------------------------------------------------------------|
| KCRB_RAT   | Creatine kinase B-type GN=Ckb PE=1 SV=2                                                          |
| KCRU_RAT   | Creatine kinase U-type, mitochondrial GN=Ckmt1 PE=1 SV=1                                         |
| KCY_RAT    | UMP-CMP kinase GN=Cmpk1 PE=1 SV=2                                                                |
| KHDR1_RAT  | KH domain-containing, RNA-binding, signal transduction-associated protein 1 GN=Khdrbs1 PE=1 SV=1 |
| KINH_RAT   | Kinesin-1 heavy chain GN=Kif5b PE=1 SV=1                                                         |
| KNT1_RAT   | T-kininogen 1 GN=Map1 PE=1 SV=2                                                                  |
| KNT2_RAT   | T-kininogen 2 PE=1 SV=2                                                                          |
| LAC2_RAT   | Ig lambda-2 chain C region PE=4 SV=1                                                             |
| LAMB2_RAT  | Laminin subunit beta-2 GN=Lamb2 PE=2 SV=1                                                        |
| LAMP1_RAT  | Lysosome-associated membrane glycoprotein 1 GN=Lamp1 PE=1 SV=1                                   |
| LAMP2_RAT  | Lysosome-associated membrane glycoprotein 2 GN=Lamp2 PE=1 SV=2                                   |
| LAP2_RAT   | Lamina-associated polypeptide 2, isoform beta GN=Tmpo PE=1 SV=3                                  |
| LASP1_RAT  | LIM and SH3 domain protein 1 GN=Lasp1 PE=1 SV=1                                                  |
| LAT1_RAT   | Large neutral amino acids transporter small subunit 1 GN=Slc7a5 PE=1 SV=2                        |
| LBP_RAT    | Lipopolysaccharide-binding protein GN=Lbp PE=2 SV=1                                              |
| LBR_RAT    | Lamin-B receptor GN=Lbr PE=1 SV=1                                                                |
| LCAP_RAT   | Leucyl-cystinyl aminopeptidase GN=Lnep PE=1 SV=1                                                 |
| LDHA_RAT   | L-lactate dehydrogenase A chain GN=Ldha PE=1 SV=1                                                |
| LDHB_RAT   | L-lactate dehydrogenase B chain GN=Ldhb PE=1 SV=2                                                |
| LEG1_RAT   | Galectin-1 GN=Lgals1 PE=1 SV=2                                                                   |
| LEG3_RAT   | Galectin-3 GN=Lgals3 PE=1 SV=4                                                                   |
| LEG5_RAT   | Galectin-5 GN=Lgals5 PE=1 SV=2                                                                   |
| LETM1_RAT  | LETM1 and EF-hand domain-containing protein 1, mitochondrial GN=Letm1 PE=1 SV=1                  |
| LG3BP_RAT  | Galectin-3-binding protein GN=Lgals3bp PE=1 SV=2                                                 |
| LGMN_RAT   | Legumain GN=Lgmn PE=1 SV=1                                                                       |
| LIFR_RAT   | Leukemia inhibitory factor receptor GN=Lifr PE=2 SV=1                                            |
| LIN7C_RAT  | Protein lin-7 homolog C GN=Lin7c PE=1 SV=1                                                       |
| LIS1_RAT   | Platelet-activating factor acetylhydrolase IB subunit alpha GN=Pafah1b1 PE=1 SV=2                |
| LMF2_RAT   | Lipase maturation factor 2 GN=Lmf2 PE=2 SV=1                                                     |
| LONM_RAT   | Lon protease homolog, mitochondrial GN=Lonp1 PE=2 SV=1                                           |
| LONP2_RAT  | Lon protease homolog 2, peroxisomal GN=Lonp2 PE=1 SV=2                                           |
| LOXL2_RAT  | Lysyl oxidase homolog 2 GN=Loxl2 PE=2 SV=2                                                       |
| LPP3_RAT   | Lipid phosphate phosphohydrolase 3 GN=Ppap2b PE=1 SV=1                                           |
| LPPRC_RAT  | Leucine-rich PPR motif-containing protein, mitochondrial GN=Lrpprc PE=1 SV=1                     |
| LPP_RAT    | Lipoma-preferred partner homolog GN=Lpp PE=2 SV=1                                                |
| LRC59_RAT  | Leucine-rich repeat-containing protein 59 GN=Lrrc59 PE=1 SV=1                                    |
| LRC8A_RAT  | Leucine-rich repeat-containing protein 8A GN=Lrrc8a PE=2 SV=1                                    |
| LRC8D_RAT  | Leucine-rich repeat-containing protein 8D GN=Lrrc8d PE=2 SV=1                                    |
| LRP2_RAT   | Low-density lipoprotein receptor-related protein 2 GN=Lrp2 PE=1 SV=1                             |
| LRRF1_RAT  | Leucine-rich repeat flightless-interacting protein 1 GN=Lrrfip1 PE=1 SV=1                        |
| LRRF2_RAT  | Leucine-rich repeat flightless-interacting protein 2 GN=Lrrfip2 PE=2 SV=1                        |
| LTOR1_RAT  | Ragulator complex protein LAMTOR1 GN=Lamtor1 PE=1 SV=1                                           |
| LTOR3_RAT  | Ragulator complex protein LAMTOR3 GN=Lamtor3 PE=2 SV=1                                           |
| LUM_RAT    | Lumican GN=Lum PE=2 SV=1                                                                         |
| LYPA1_RAT  | Acyl-protein thioesterase 1 GN=Lypla1 PE=1 SV=1                                                  |
| MOR3M4_RAT | Protein LOC100911178 GN=LOC100911178 PE=4 SV=1                                                   |
| MOR3V4_RAT | Protein LOC501282 GN=LOC501282 PE=4 SV=1                                                         |
| MOR3Z3_RAT | Protein Tmem87a GN=Tmem87a PE=4 SV=1                                                             |
| MOR402_RAT | Protein Tmx3 GN=Tmx3 PE=4 SV=1                                                                   |
| MOR455_RAT | Protein LOC100911107 GN=LOC100911107 PE=3 SV=1                                                   |
| MOR485_RAT | Protein Pglyrp2 GN=Pglyrp2 PE=4 SV=1                                                             |
| MOR4G8_RAT | Protein Tnfaip6 (Fragment) GN=Tnfaip6 PE=4 SV=1                                                  |
| MOR4L3_RAT | Peroxisomal targeting signal 1 receptor GN=Pex5 PE=4 SV=1                                        |
| MOR4T1_RAT | Homeobox protein cut-like 1 GN=Cux1 PE=4 SV=1                                                    |
| MOR535_RAT | Protein RGD1565829 (Fragment) GN=RGD1565829 PE=4 SV=1                                            |
| MOR5F8_RAT | High mobility group nucleosome-binding domain-containing protein 5 GN=Hmgn5 PE=4 SV=1            |
| MOR5H1_RAT | Protein Etl4 (Fragment) GN=Etl4 PE=4 SV=1                                                        |
| MOR5H9_RAT | Uncharacterized protein PE=4 SV=1                                                                |
| MOR5J4_RAT | Uncharacterized protein PE=3 SV=1                                                                |
| MOR5Q3_RAT | Protein Ranbp3 GN=Ranbp3 PE=4 SV=1                                                               |
| MOR618_RAT | Protein Etl4 (Fragment) GN=Etl4 PE=4 SV=1                                                        |

|            |                                                                                       |
|------------|---------------------------------------------------------------------------------------|
| MOR6B7_RAT | Uncharacterized protein (Fragment) PE=4 SV=1                                          |
| MOR6K0_RAT | Laminin subunit beta-2 GN=Lamb2 PE=4 SV=1                                             |
| MOR776_RAT | Protein Mrps36 GN=Mrps36 PE=4 SV=1                                                    |
| MOR785_RAT | Protein LOC100910788 GN=Chchd2 PE=4 SV=1                                              |
| MOR7B4_RAT | Protein LOC684828 GN=LOC684828 PE=3 SV=1                                              |
| MOR7E6_RAT | Protein Srrt GN=Srrt PE=4 SV=1                                                        |
| MOR7F0_RAT | Serine protease HTRA3 GN=Htra3 PE=4 SV=1                                              |
| MOR7T1_RAT | Phosphatase and actin regulator GN=Phactr4 PE=3 SV=1                                  |
| MOR7Z0_RAT | Uncharacterized protein PE=4 SV=1                                                     |
| MOR808_RAT | Protein LOC100362504 GN=LOC100362504 PE=4 SV=1                                        |
| MOR8B6_RAT | Protein Tubb1 GN=Tubb1 PE=3 SV=1                                                      |
| MOR907_RAT | Protein Snrpd3 GN=Snrpd3 PE=4 SV=1                                                    |
| MOR913_RAT | Phosphatase and actin regulator (Fragment) GN=Phactr4 PE=3 SV=1                       |
| MOR920_RAT | Protein Ranbp3 GN=Ranbp3 PE=4 SV=1                                                    |
| MOR961_RAT | Far upstream element-binding protein 2 GN=Khsrp PE=4 SV=1                             |
| MOR979_RAT | Protein Thbs1 (Fragment) GN=Thbs1 PE=4 SV=1                                           |
| MOR9D0_RAT | Protein LOC100909983 GN=Anp32a PE=4 SV=1                                              |
| MOR9D5_RAT | Uncharacterized protein GN=Ahnak PE=1 SV=1                                            |
| MOR9G4_RAT | Uncharacterized protein PE=1 SV=1                                                     |
| MOR9G7_RAT | DNA topoisomerase 2 (Fragment) GN=Top2b PE=3 SV=1                                     |
| MOR9I4_RAT | Protein Pml (Fragment) GN=Pml PE=4 SV=1                                               |
| MOR9I6_RAT | Aminomethyltransferase GN=Amt PE=3 SV=1                                               |
| MOR9I8_RAT | 40S ribosomal protein S12 GN=LOC100364427 PE=3 SV=1                                   |
| MOR9L0_RAT | Protein Naca GN=Naca PE=4 SV=1                                                        |
| MOR9L3_RAT | Sorting nexin (Fragment) GN=Snx9 PE=3 SV=1                                            |
| MOR9Q1_RAT | Protein LOC100911677 GN=LOC100911677 PE=4 SV=1                                        |
| MOR9U5_RAT | Protein LOC100911422 (Fragment) GN=LOC100911422 PE=4 SV=1                             |
| MOR9X8_RAT | Cytoplasmic dynein 1 heavy chain 1 GN=Dync1h1 PE=4 SV=1                               |
| MOR9Y3_RAT | Protein Nup43 GN=Nup43 PE=4 SV=1                                                      |
| MORA39_RAT | Protein Mxra7 GN=Mxra7 PE=4 SV=1                                                      |
| MORBFO_RAT | Scaffold attachment factor B1 GN=Safb PE=4 SV=1                                       |
| MORBF1_RAT | Complement C3 GN=C3 PE=4 SV=1                                                         |
| MORBJ7_RAT | Complement C3 GN=C3 PE=4 SV=1                                                         |
| MORB59_RAT | Sorting nexin family member 27, isoform CRA_a GN=Snx27 PE=4 SV=1                      |
| MORBX9_RAT | Protein Mia3 (Fragment) GN=Mia3 PE=4 SV=1                                             |
| MORC57_RAT | Protein unc-45 homolog A GN=Smep1 PE=4 SV=1                                           |
| MORC65_RAT | Cofilin 2, muscle (Predicted), isoform CRA_b GN=Cfl2 PE=4 SV=1                        |
| MORC99_RAT | Protein Rab5a GN=Rab5a1 PE=3 SV=1                                                     |
| MORCA6_RAT | Advillin GN=Avil PE=4 SV=1                                                            |
| MORCF3_RAT | Integrin beta GN=Itgb3 PE=3 SV=1                                                      |
| MORCH6_RAT | Protein Chmp4b GN=Chmp4b PE=4 SV=1                                                    |
| MORCH8_RAT | Uncharacterized protein PE=4 SV=1                                                     |
| MORCS2_RAT | Protein Tbl2 GN=Tbl2 PE=4 SV=1                                                        |
| MORD20_RAT | Protein LOC100911363 GN=Capns1 PE=4 SV=1                                              |
| MORD63_RAT | Protein Ranbp3 GN=Ranbp3 PE=4 SV=1                                                    |
| MORD75_RAT | 40S ribosomal protein S6 (Fragment) GN=Rps6 PE=3 SV=1                                 |
| MORDA4_RAT | Protein Ephb4 GN=Ephb4 PE=4 SV=1                                                      |
| MORDD7_RAT | RCG29880 GN=rCG_29880 PE=4 SV=1                                                       |
| MORDI5_RAT | Protein Mcu GN=Mcu PE=4 SV=1                                                          |
| MORDJ3_RAT | Interferon-induced, double-stranded RNA-activated protein kinase GN=Eif2ak2 PE=3 SV=1 |
| MORDJ4_RAT | Glia maturation factor beta GN=Gmfb PE=4 SV=1                                         |
| M2OM_RAT   | Mitochondrial 2-oxoglutarate/malate carrier protein GN=Slc25a11 PE=2 SV=3             |
| M3ZCQ2_RAT | U5 small nuclear ribonucleoprotein 200 kDa helicase GN=Snrnp200 PE=1 SV=1             |
| M3ZCQ4_RAT | Keratin, type II cytoskeletal 2 epidermal GN=Krt2 PE=3 SV=1                           |
| M9MMN0_RAT | Protein Ighg3 (Fragment) GN=Ighg3 PE=4 SV=1                                           |
| MACF1_RAT  | Microtubule-actin cross-linking factor 1 GN=Macf1 PE=1 SV=1                           |
| MANF_RAT   | Mesencephalic astrocyte-derived neurotrophic factor GN=Manf PE=1 SV=1                 |
| MAP1A_RAT  | Microtubule-associated protein 1A GN=Map1a PE=1 SV=1                                  |
| MAP1B_RAT  | Microtubule-associated protein 1B GN=Map1b PE=1 SV=2                                  |
| MAP1S_RAT  | Microtubule-associated protein 1S GN=Map1s PE=1 SV=1                                  |
| MAP2_RAT   | Methionine aminopeptidase 2 GN=Metap2 PE=1 SV=2                                       |

|           |                                                                                                   |
|-----------|---------------------------------------------------------------------------------------------------|
| MARC2_RAT | Mitochondrial amidoxime reducing component 2 GN=Marc2 PE=2 SV=1                                   |
| MARCS_RAT | Myristoylated alanine-rich C-kinase substrate GN=Marcks PE=1 SV=2                                 |
| MARE1_RAT | Microtubule-associated protein RP/EB family member 1 GN=Mapre1 PE=1 SV=3                          |
| MATR3_RAT | Matrin-3 GN=Matr3 PE=1 SV=2                                                                       |
| MBB1A_RAT | Myb-binding protein 1A GN=Mybbp1a PE=2 SV=2                                                       |
| MBNL2_RAT | Muscleblind-like protein 2 GN=Mbnl2 PE=1 SV=1                                                     |
| MBOA5_RAT | Lysophospholipid acyltransferase 5 GN=Lpcat3 PE=2 SV=1                                            |
| MCATL_RAT | Mitochondrial carnitine/acylcarnitine carrier protein CACL GN=Slc25a29 PE=2 SV=1                  |
| MCAT_RAT  | Mitochondrial carnitine/acylcarnitine carrier protein GN=Slc25a20 PE=1 SV=1                       |
| MCFD2_RAT | Multiple coagulation factor deficiency protein 2 homolog GN=Mcf2 PE=2 SV=1                        |
| MDHC_RAT  | Malate dehydrogenase, cytoplasmic GN=Mdh1 PE=1 SV=3                                               |
| MDHM_RAT  | Malate dehydrogenase, mitochondrial GN=Mdh2 PE=1 SV=2                                             |
| MESD_RAT  | LDLR chaperone MESD GN=Mesdc2 PE=2 SV=1                                                           |
| MET7B_RAT | Methyltransferase-like protein 7B GN=Met7b PE=1 SV=1                                              |
| MFGM_RAT  | Lactadherin GN=Mfge8 PE=2 SV=1                                                                    |
| MFN1_RAT  | Mitofusin-1 GN=Mfn1 PE=1 SV=1                                                                     |
| MGAT1_RAT | Alpha-1,3-mannosyl-glycoprotein 2-beta-N-acetylglucosaminyltransferase GN=Mgat1 PE=2 SV=1         |
| MGAT2_RAT | Alpha-1,6-mannosyl-glycoprotein 2-beta-N-acetylglucosaminyltransferase GN=Mgat2 PE=1 SV=1         |
| MGLL_RAT  | Monoglyceride lipase GN=Mgl1 PE=1 SV=1                                                            |
| MK01_RAT  | Mitogen-activated protein kinase 1 GN=Mapk1 PE=1 SV=3                                             |
| MK_RAT    | Midkine GN=Mdk PE=2 SV=1                                                                          |
| ML12B_RAT | Myosin regulatory light chain 12B GN=Myl12b PE=1 SV=3                                             |
| MLEC_RAT  | Malectin GN=Mlec PE=2 SV=1                                                                        |
| MMP12_RAT | Macrophage metalloelastase GN=Mmp12 PE=2 SV=1                                                     |
| MMSA_RAT  | Methylmalonate-semialdehyde dehydrogenase [acylating], mitochondrial GN=Aldh6a1 PE=1 SV=1         |
| MOGS_RAT  | Mannosyl-oligosaccharide glucosidase GN=Mogs PE=1 SV=1                                            |
| MOT1_RAT  | Monocarboxylate transporter 1 GN=Slc16a1 PE=1 SV=1                                                |
| MOT4_RAT  | Monocarboxylate transporter 4 GN=Slc16a3 PE=2 SV=1                                                |
| MPP7_RAT  | MAGUK p55 subfamily member 7 GN=Mpp7 PE=2 SV=2                                                    |
| MPPB_RAT  | Mitochondrial-processing peptidase subunit beta GN=Pmpcb PE=1 SV=3                                |
| MPRD_RAT  | Cation-dependent mannose-6-phosphate receptor GN=M6pr PE=2 SV=1                                   |
| MRCKB_RAT | Serine/threonine-protein kinase MRCK beta GN=Cdc42bpb PE=1 SV=1                                   |
| MRGRG_RAT | Mas-related G-protein coupled receptor member G GN=Mrgprg PE=3 SV=1                               |
| MRLCA_RAT | Myosin regulatory light chain RLC-A GN=Rlc-a PE=2 SV=2                                            |
| MRP_RAT   | MARCKS-related protein GN=Marcksl1 PE=2 SV=3                                                      |
| MSPD1_RAT | Motile sperm domain-containing protein 1 GN=Mospd1 PE=2 SV=1                                      |
| MVP_RAT   | Major vault protein GN=Mvp PE=1 SV=4                                                              |
| MYADM_RAT | Myeloid-associated differentiation marker GN=Myadm PE=2 SV=1                                      |
| MYL6_RAT  | Myosin light polypeptide 6 GN=Myl6 PE=1 SV=3                                                      |
| MYO1C_RAT | Unconventional myosin-Ic GN=Myo1c PE=1 SV=2                                                       |
| MYO1D_RAT | Unconventional myosin-IId GN=Myo1d PE=1 SV=3                                                      |
| MYO1E_RAT | Unconventional myosin-Ie GN=Myo1e PE=1 SV=1                                                       |
| MYO9B_RAT | Unconventional myosin-IXb GN=Myo9b PE=1 SV=1                                                      |
| MYZAP_RAT | Myocardial zonula adherens protein GN=Myzap PE=1 SV=1                                             |
| NAGAB_RAT | Alpha-N-acetylgalactosaminidase GN=Naga PE=2 SV=1                                                 |
| NB5R1_RAT | NADH-cytochrome b5 reductase 1 GN=Cyb5r1 PE=2 SV=1                                                |
| NCAM1_RAT | Neural cell adhesion molecule 1 GN=Ncam1 PE=1 SV=1                                                |
| NCBP1_RAT | Nuclear cap-binding protein subunit 1 GN=Ncbp1 PE=2 SV=1                                          |
| NCEH1_RAT | Neutral cholesterol ester hydrolase 1 GN=Nceh1 PE=2 SV=1                                          |
| NCKP1_RAT | Nck-associated protein 1 GN=Nckap1 PE=2 SV=1                                                      |
| NCLN_RAT  | Nicalin GN=Ncln PE=2 SV=1                                                                         |
| NCPR_RAT  | NADPH--cytochrome P450 reductase GN=Por PE=1 SV=3                                                 |
| NDC1_RAT  | Nucleoporin NDC1 GN=Ndc1 PE=1 SV=1                                                                |
| NDKA_RAT  | Nucleoside diphosphate kinase A GN=Nme1 PE=1 SV=1                                                 |
| NDKB_RAT  | Nucleoside diphosphate kinase B GN=Nme2 PE=1 SV=1                                                 |
| NDRG1_RAT | Protein NDRG1 GN=Ndr1 PE=1 SV=1                                                                   |
| NDUA5_RAT | NADH dehydrogenase [ubiquinone] 1 alpha subcomplex subunit 5 GN=Ndufa5 PE=1 SV=3                  |
| NDUA9_RAT | NADH dehydrogenase [ubiquinone] 1 alpha subcomplex subunit 9, mitochondrial GN=Ndufa9 PE=1 SV=2   |
| NDUAA_RAT | NADH dehydrogenase [ubiquinone] 1 alpha subcomplex subunit 10, mitochondrial GN=Ndufa10 PE=1 SV=1 |
| NDUS1_RAT | NADH-ubiquinone oxidoreductase 75 kDa subunit, mitochondrial GN=Ndufs1 PE=1 SV=1                  |
| NDUS2_RAT | NADH dehydrogenase [ubiquinone] iron-sulfur protein 2, mitochondrial GN=Ndufs2 PE=1 SV=1          |

|            |                                                                                                                            |
|------------|----------------------------------------------------------------------------------------------------------------------------|
| NDUS4_RAT  | NADH dehydrogenase [ubiquinone] iron-sulfur protein 4, mitochondrial GN=Ndufs4 PE=1 SV=1                                   |
| NDUV2_RAT  | NADH dehydrogenase [ubiquinone] flavoprotein 2, mitochondrial GN=Ndufv2 PE=1 SV=2                                          |
| NEDD4_RAT  | E3 ubiquitin-protein ligase NEDD4 GN=Nedd4 PE=1 SV=1                                                                       |
| NEP_RAT    | Nepilysin GN=Mme PE=1 SV=2                                                                                                 |
| NEUL_RAT   | Neurolysin, mitochondrial GN=Nln PE=1 SV=1                                                                                 |
| NH2L1_RAT  | NHP2-like protein 1 GN=Nhp2l1 PE=2 SV=4                                                                                    |
| NHRF1_RAT  | Na(+)/H(+) exchange regulatory cofactor NHE-RF1 GN=Slc9a3r1 PE=1 SV=3                                                      |
| NIBAN_RAT  | Protein Niban GN=Fam129a PE=2 SV=2                                                                                         |
| NIBL1_RAT  | Niban-like protein 1 GN=Fam129b PE=2 SV=1                                                                                  |
| NIT1_RAT   | Nitrilase homolog 1 GN=Nit1 PE=2 SV=1                                                                                      |
| NIT2_RAT   | Omega-amidase NIT2 GN=Nit2 PE=1 SV=1                                                                                       |
| NLRX1_RAT  | NLR family member X1 GN=Nlr1 PE=2 SV=1                                                                                     |
| NMES1_RAT  | Normal mucosa of esophagus-specific gene 1 protein GN=Nmes1 PE=3 SV=1                                                      |
| NMT1_RAT   | Glycylpeptide N-tetradecanoyltransferase 1 GN=Nmt1 PE=2 SV=1                                                               |
| NNRD_RAT   | ATP-dependent (S)-NAD(P)H-hydrate dehydratase GN=Carkd PE=3 SV=1                                                           |
| NNRE_RAT   | NAD(P)H-hydrate epimerase GN=Apoa1bp PE=2 SV=1                                                                             |
| NOG1_RAT   | Nucleolar GTP-binding protein 1 GN=Gtpbp4 PE=2 SV=3                                                                        |
| NONO_RAT   | Non-POU domain-containing octamer-binding protein GN=Nono PE=2 SV=3                                                        |
| NOP58_RAT  | Nucleolar protein 58 GN=Nop58 PE=1 SV=1                                                                                    |
| NPL4_RAT   | Nuclear protein localization protein 4 homolog GN=Nploc4 PE=1 SV=3                                                         |
| NSF1C_RAT  | NSFL1 cofactor p47 GN=Nsf1c PE=1 SV=1                                                                                      |
| NSF_RAT    | Vesicle-fusing ATPase GN=Nsf PE=1 SV=1                                                                                     |
| NSMA_RAT   | Sphingomyelin phosphodiesterase 2 GN=Smpd2 PE=1 SV=1                                                                       |
| NT5D2_RAT  | 5'-nucleotidase domain-containing protein 2 GN=Nt5dc2 PE=2 SV=2                                                            |
| NU107_RAT  | Nuclear pore complex protein Nup107 GN=Nup107 PE=1 SV=1                                                                    |
| NU153_RAT  | Nuclear pore complex protein Nup153 GN=Nup153 PE=1 SV=1                                                                    |
| NU155_RAT  | Nuclear pore complex protein Nup155 GN=Nup155 PE=1 SV=1                                                                    |
| NUCB1_RAT  | Nucleobindin-1 GN=Nucb1 PE=1 SV=1                                                                                          |
| NUCB2_RAT  | Nucleobindin-2 GN=Nucb2 PE=2 SV=1                                                                                          |
| NUCL_RAT   | Nucleolin GN=Ncl PE=1 SV=3                                                                                                 |
| NUDC_RAT   | Nuclear migration protein nudC GN=Nudc PE=1 SV=1                                                                           |
| NUP53_RAT  | Nucleoporin NUP53 GN=Nup35 PE=1 SV=1                                                                                       |
| NUP54_RAT  | Nuclear pore complex protein Nup54 GN=Nup54 PE=1 SV=1                                                                      |
| NUP62_RAT  | Nuclear pore glycoprotein p62 GN=Nup62 PE=1 SV=1                                                                           |
| NUP85_RAT  | Nuclear pore complex protein Nup85 GN=Nup85 PE=2 SV=1                                                                      |
| NUP88_RAT  | Nuclear pore complex protein Nup88 GN=Nup88 PE=1 SV=1                                                                      |
| NUP93_RAT  | Nuclear pore complex protein Nup93 GN=Nup93 PE=1 SV=1                                                                      |
| O55215_RAT | Ribosomal protein S2 GN=Rps2-ps6 PE=2 SV=1                                                                                 |
| O70534_RAT | Delta-like 1 homolog (Drosophila) GN=Dlk1 PE=2 SV=1                                                                        |
| O88206_RAT | Protein Tpbpa (Precursor) GN=Tpbpa PE=2 SV=1                                                                               |
| O88321_RAT | Antisecretory factor GN=Psm4 PE=2 SV=1                                                                                     |
| O88752_RAT | Epsilon 1 globin GN=Hbe1 PE=2 SV=1                                                                                         |
| O88754_RAT | Epsilon 3 globin GN=Hbg1 PE=2 SV=1                                                                                         |
| O89035_RAT | Mitochondrial dicarboxylate carrier GN=Slc25a10 PE=2 SV=1                                                                  |
| OAT_RAT    | Ornithine aminotransferase, mitochondrial GN=Oat PE=1 SV=1                                                                 |
| OBSL1_RAT  | Obscurin-like protein 1 GN=Obsl1 PE=2 SV=3                                                                                 |
| OCAD1_RAT  | O CIA domain-containing protein 1 GN=Ociad1 PE=1 SV=1                                                                      |
| ODBA_RAT   | 2-oxoisovalerate dehydrogenase subunit alpha, mitochondrial (Fragment) GN=Bckdha PE=1 SV=1                                 |
| ODBB_RAT   | 2-oxoisovalerate dehydrogenase subunit beta, mitochondrial GN=Bckdhb PE=1 SV=3                                             |
| ODO1_RAT   | 2-oxoglutarate dehydrogenase, mitochondrial GN=Ogdh PE=1 SV=1                                                              |
| ODP2_RAT   | Dihydrolypoyllysine-residue acetyltransferase component of pyruvate dehydrogenase complex, mitochondrial GN=Dlat PE=1 SV=3 |
| ODPB_RAT   | Pyruvate dehydrogenase E1 component subunit beta, mitochondrial GN=Pdhb PE=1 SV=2                                          |
| OLA1_RAT   | Obg-like ATPase 1 GN=Ola1 PE=2 SV=1                                                                                        |
| OLR1_RAT   | Oxidized low-density lipoprotein receptor 1 GN=Olr1 PE=2 SV=1                                                              |
| OS9_RAT    | Protein OS-9 GN=Os9 PE=1 SV=1                                                                                              |
| OST48_RAT  | Dolichyl-diphosphooligosaccharide--protein glycosyltransferase 48 kDa subunit GN=Ddost PE=2 SV=1                           |
| OSTF1_RAT  | Osteoclast-stimulating factor 1 GN=Ostf1 PE=2 SV=1                                                                         |
| OTUB1_RAT  | Ubiquitin thioesterase OTUB1 GN=Otub1 PE=1 SV=1                                                                            |
| P2RX4_RAT  | P2X purinoceptor 4 GN=P2rx4 PE=1 SV=1                                                                                      |
| P3H1_RAT   | Prolyl 3-hydroxylase 1 GN=Lepre1 PE=1 SV=1                                                                                 |
| P4HA1_RAT  | Prolyl 4-hydroxylase subunit alpha-1 GN=P4ha1 PE=2 SV=2                                                                    |

|            |                                                                                      |
|------------|--------------------------------------------------------------------------------------|
| P70608_RAT | Cationic amino acid transporter-1 GN=Slc7a1 PE=2 SV=1                                |
| PA1B2_RAT  | Platelet-activating factor acetylhydrolase IB subunit beta GN=Pafah1b2 PE=1 SV=1     |
| PA1B3_RAT  | Platelet-activating factor acetylhydrolase IB subunit gamma GN=Pafah1b3 PE=2 SV=1    |
| PABP1_RAT  | Polyadenylate-binding protein 1 GN=Pabpc1 PE=1 SV=1                                  |
| PADI2_RAT  | Protein-arginine deiminase type-2 GN=Padi2 PE=1 SV=1                                 |
| PAI1_RAT   | Plasminogen activator inhibitor 1 GN=Serpine1 PE=2 SV=1                              |
| PAK2_RAT   | Serine/threonine-protein kinase PAK 2 GN=Pak2 PE=1 SV=1                              |
| PALLD_RAT  | Palladin (Fragment) GN=Palld PE=2 SV=1                                               |
| PARK7_RAT  | Protein DJ-1 GN=Park7 PE=1 SV=1                                                      |
| PARP1_RAT  | Poly [ADP-ribose] polymerase 1 GN=Parp1 PE=1 SV=4                                    |
| PARVA_RAT  | Alpha-parvin GN=Parva PE=1 SV=2                                                      |
| PAWR_RAT   | PRKC apoptosis WT1 regulator protein GN=Pawr PE=1 SV=1                               |
| PAXI_RAT   | Paxillin GN=Pxn PE=1 SV=1                                                            |
| PBIP1_RAT  | Pre-B-cell leukemia transcription factor-interacting protein 1 GN=Pbxip1 PE=2 SV=1   |
| PCAT1_RAT  | Lysophosphatidylcholine acyltransferase 1 GN=Lpcat1 PE=2 SV=2                        |
| PCY1A_RAT  | Choline-phosphate cytidyltransferase A GN=Pcyt1a PE=1 SV=2                           |
| PCYOX_RAT  | Preylcysteine oxidase GN=Pcyox1 PE=1 SV=1                                            |
| PDC10_RAT  | Programmed cell death protein 10 GN=Pdcd10 PE=2 SV=1                                 |
| PDC6I_RAT  | Programmed cell death 6-interacting protein GN=Pdcd6ip PE=1 SV=2                     |
| PDIA1_RAT  | Protein disulfide-isomerase GN=P4hb PE=1 SV=2                                        |
| PDIA3_RAT  | Protein disulfide-isomerase A3 GN=Pdia3 PE=1 SV=2                                    |
| PDIA5_RAT  | Protein disulfide-isomerase A5 GN=Pdia5 PE=2 SV=1                                    |
| PDIA6_RAT  | Protein disulfide-isomerase A6 GN=Pdia6 PE=1 SV=2                                    |
| PDL1_RAT   | PDZ and LIM domain protein 1 GN=Pdlim1 PE=2 SV=4                                     |
| PDL2_RAT   | PDZ and LIM domain protein 2 GN=Pdlim2 PE=1 SV=1                                     |
| PDL5_RAT   | PDZ and LIM domain protein 5 GN=Pdlim5 PE=1 SV=2                                     |
| PDL7_RAT   | PDZ and LIM domain protein 7 GN=Pdlim7 PE=1 SV=1                                     |
| PEA15_RAT  | Astrocytic phosphoprotein PEA-15 GN=Pea15 PE=1 SV=1                                  |
| PEBP1_RAT  | Phosphatidylethanolamine-binding protein 1 GN=Pebp1 PE=1 SV=3                        |
| PECA1_RAT  | Platelet endothelial cell adhesion molecule GN=Pecam1 PE=2 SV=1                      |
| PEF1_RAT   | Peflin GN=Pef1 PE=2 SV=1                                                             |
| PELP1_RAT  | Proline-, glutamic acid- and leucine-rich protein 1 GN=Pelp1 PE=2 SV=2               |
| PEX14_RAT  | Peroxisomal membrane protein PEX14 GN=Pex14 PE=1 SV=1                                |
| PEX5_RAT   | Peroxisomal targeting signal 1 receptor GN=Pex5 PE=1 SV=2                            |
| PFD2_RAT   | Prefoldin subunit 2 GN=Pfdn2 PE=2 SV=1                                               |
| PGAM1_RAT  | Phosphoglycerate mutase 1 GN=Pgam1 PE=1 SV=4                                         |
| PGFRB_RAT  | Platelet-derived growth factor receptor beta GN=Pdgfrb PE=2 SV=2                     |
| PGK1_RAT   | Phosphoglycerate kinase 1 GN=Pgk1 PE=1 SV=2                                          |
| PGRC1_RAT  | Membrane-associated progesterone receptor component 1 GN=Pgrmc1 PE=1 SV=3            |
| PGRC2_RAT  | Membrane-associated progesterone receptor component 2 GN=Pgrmc2 PE=2 SV=1            |
| PGS1_RAT   | Biglycan GN=Bgn PE=2 SV=1                                                            |
| PGS2_RAT   | Decorin GN=Dcn PE=1 SV=1                                                             |
| PHB2_RAT   | Prohibitin-2 GN=Phb2 PE=1 SV=1                                                       |
| PHB_RAT    | Prohibitin GN=Phb PE=1 SV=1                                                          |
| PHF5A_RAT  | PHD finger-like domain-containing protein 5A GN=Phf5a PE=2 SV=1                      |
| PIGS_RAT   | GPI transamidase component PIG-S GN=Pigs PE=2 SV=3                                   |
| PKN1_RAT   | Serine/threonine-protein kinase N1 GN=Pkn1 PE=1 SV=2                                 |
| PLAK_RAT   | Junction plakoglobin GN=Jup PE=1 SV=1                                                |
| PLAP_RAT   | Phospholipase A-2-activating protein GN=Plaa PE=2 SV=3                               |
| PLBL1_RAT  | Phospholipase B-like 1 GN=Plbd1 PE=2 SV=1                                            |
| PLCD1_RAT  | 1-phosphatidylinositol 4,5-bisphosphate phosphodiesterase delta-1 GN=Plcd1 PE=1 SV=1 |
| PLCD_RAT   | 1-acyl-sn-glycerol-3-phosphate acyltransferase delta GN=Agpat4 PE=2 SV=1             |
| PLET1_RAT  | Placenta-expressed transcript 1 protein GN=Plet1 PE=2 SV=1                           |
| PLF4_RAT   | Platelet factor 4 GN=Pf4 PE=1 SV=1                                                   |
| PLMN_RAT   | Plasminogen GN=Plg PE=2 SV=2                                                         |
| PLOD1_RAT  | Procollagen-lysine,2-oxoglutarate 5-dioxygenase 1 GN=Plod1 PE=2 SV=1                 |
| PLOD3_RAT  | Procollagen-lysine,2-oxoglutarate 5-dioxygenase 3 GN=Plod3 PE=2 SV=1                 |
| PLRKT_RAT  | Plasminogen receptor (KT) GN=Plgrkt PE=1 SV=1                                        |
| PLST_RAT   | Plastin-3 GN=Pls3 PE=2 SV=2                                                          |
| PLVAP_RAT  | Plasmalemma vesicle-associated protein GN=Plvap PE=1 SV=1                            |
| PNPH_RAT   | Purine nucleoside phosphorylase GN=Pnp PE=1 SV=1                                     |

|           |                                                                                                  |
|-----------|--------------------------------------------------------------------------------------------------|
| PODXL_RAT | Podocalyxin GN=Podxl PE=1 SV=2                                                                   |
| PON1_RAT  | Serum paraoxonase/arylesterase 1 GN=Pon1 PE=1 SV=3                                               |
| PON2_RAT  | Serum paraoxonase/arylesterase 2 GN=Pon2 PE=2 SV=1                                               |
| PP1A_RAT  | Serine/threonine-protein phosphatase PP1-alpha catalytic subunit GN=Ppp1ca PE=1 SV=1             |
| PP1B_RAT  | Serine/threonine-protein phosphatase PP1-beta catalytic subunit GN=Ppp1cb PE=1 SV=3              |
| PP1R7_RAT | Protein phosphatase 1 regulatory subunit 7 GN=Ppp1r7 PE=1 SV=1                                   |
| PP2AA_RAT | Serine/threonine-protein phosphatase 2A catalytic subunit alpha isoform GN=Ppp2ca PE=1 SV=1      |
| PP4C_RAT  | Serine/threonine-protein phosphatase 4 catalytic subunit GN=Ppp4c PE=2 SV=1                      |
| PPBT_RAT  | Alkaline phosphatase, tissue-nonspecific isozyme GN=Alpl PE=1 SV=2                               |
| PPIA_RAT  | Peptidyl-prolyl cis-trans isomerase A GN=Ppia PE=1 SV=2                                          |
| PPIB_RAT  | Peptidyl-prolyl cis-trans isomerase B GN=Ppib PE=1 SV=3                                          |
| PPID_RAT  | Peptidyl-prolyl cis-trans isomerase D GN=Ppid PE=1 SV=3                                          |
| PPIF_RAT  | Peptidyl-prolyl cis-trans isomerase F, mitochondrial GN=Ppif PE=1 SV=2                           |
| PPIG_RAT  | Peptidyl-prolyl cis-trans isomerase G GN=Ppig PE=1 SV=2                                          |
| PPM1A_RAT | Protein phosphatase 1A GN=Ppm1a PE=1 SV=1                                                        |
| PR2A1_RAT | Prolactin-2A1 GN=Prl2a1 PE=2 SV=1                                                                |
| PR3B1_RAT | Prolactin-3B1 GN=Prl3b1 PE=2 SV=2                                                                |
| PR3D4_RAT | Prolactin-3D4 GN=Prl3d4 PE=1 SV=2                                                                |
| PR4A1_RAT | Prolactin-4A1 GN=Prl4a1 PE=2 SV=2                                                                |
| PR6A1_RAT | Prolactin-6A1 GN=Prl6a1 PE=2 SV=1                                                                |
| PRAF1_RAT | Prenylated Rab acceptor protein 1 GN=Rabac1 PE=1 SV=1                                            |
| PRAF3_RAT | PRA1 family protein 3 GN=Arl6ip5 PE=1 SV=1                                                       |
| PRDBP_RAT | Protein kinase C delta-binding protein GN=Prkdbp PE=1 SV=1                                       |
| PRDX1_RAT | Peroxiredoxin-1 GN=Prdx1 PE=1 SV=1                                                               |
| PRDX2_RAT | Peroxiredoxin-2 GN=Prdx2 PE=1 SV=3                                                               |
| PRDX4_RAT | Peroxiredoxin-4 GN=Prdx4 PE=2 SV=1                                                               |
| PRDX6_RAT | Peroxiredoxin-6 GN=Prdx6 PE=1 SV=3                                                               |
| PRIO_RAT  | Major prion protein GN=Prnp PE=1 SV=2                                                            |
| PRKRA_RAT | Interferon-inducible double-stranded RNA-dependent protein kinase activator A GN=Prkra PE=1 SV=1 |
| PROF1_RAT | Profilin-1 GN=Pfn1 PE=1 SV=2                                                                     |
| PRP19_RAT | Pre-mRNA-processing factor 19 GN=Prpf19 PE=2 SV=2                                                |
| PRP6_RAT  | Pre-mRNA-processing factor 6 GN=Prpf6 PE=2 SV=1                                                  |
| PRPS1_RAT | Ribose-phosphate pyrophosphokinase 1 GN=Prps1 PE=1 SV=2                                          |
| PRRC1_RAT | Protein PRRC1 GN=Prrc1 PE=2 SV=1                                                                 |
| PRS4_RAT  | 26S protease regulatory subunit 4 GN=Psmc1 PE=2 SV=1                                             |
| PRS6A_RAT | 26S protease regulatory subunit 6A GN=Psmc3 PE=2 SV=1                                            |
| PRS8_RAT  | 26S protease regulatory subunit 8 GN=Psmc5 PE=1 SV=1                                             |
| PRSS8_RAT | Prostasin GN=Prss8 PE=2 SV=3                                                                     |
| PSA1_RAT  | Proteasome subunit alpha type-1 GN=Psa1 PE=1 SV=2                                                |
| PSA2_RAT  | Proteasome subunit alpha type-2 GN=Psa2 PE=1 SV=3                                                |
| PSA3_RAT  | Proteasome subunit alpha type-3 GN=Psa3 PE=1 SV=3                                                |
| PSA4_RAT  | Proteasome subunit alpha type-4 GN=Psa4 PE=1 SV=1                                                |
| PSA6_RAT  | Proteasome subunit alpha type-6 GN=Psa6 PE=1 SV=1                                                |
| PSB1_RAT  | Proteasome subunit beta type-1 GN=Psb1 PE=1 SV=3                                                 |
| PSB2_RAT  | Proteasome subunit beta type-2 GN=Psb2 PE=1 SV=1                                                 |
| PSB3_RAT  | Proteasome subunit beta type-3 GN=Psb3 PE=1 SV=1                                                 |
| PSB6_RAT  | Proteasome subunit beta type-6 GN=Psb6 PE=1 SV=3                                                 |
| PSB7_RAT  | Proteasome subunit beta type-7 GN=Psb7 PE=1 SV=1                                                 |
| PSD11_RAT | 26S proteasome non-ATPase regulatory subunit 11 GN=Psd11 PE=3 SV=2                               |
| PSD13_RAT | 26S proteasome non-ATPase regulatory subunit 13 GN=Psd13 PE=1 SV=1                               |
| PSMD1_RAT | 26S proteasome non-ATPase regulatory subunit 1 GN=Psd1 PE=2 SV=1                                 |
| PSMD2_RAT | 26S proteasome non-ATPase regulatory subunit 2 GN=Psd2 PE=2 SV=1                                 |
| PSPC1_RAT | Paraspeckle component 1 GN=Pspc1 PE=2 SV=1                                                       |
| PTBP3_RAT | Polypyrimidine tract-binding protein 3 GN=Ptbp3 PE=2 SV=1                                        |
| PTGIS_RAT | Prostacyclin synthase GN=Ptgis PE=2 SV=1                                                         |
| PTMA_RAT  | Prothymosin alpha GN=Ptma PE=1 SV=2                                                              |
| PTN1_RAT  | Tyrosine-protein phosphatase non-receptor type 1 GN=Ptpn1 PE=1 SV=1                              |
| PTN6_RAT  | Tyrosine-protein phosphatase non-receptor type 6 GN=Ptpn6 PE=1 SV=1                              |
| PTTG_RAT  | Pituitary tumor-transforming gene 1 protein-interacting protein GN=Pttg1ip PE=2 SV=1             |
| PUR6_RAT  | Multifunctional protein ADE2 GN=Paics PE=2 SV=3                                                  |
| PUR9_RAT  | Bifunctional purine biosynthesis protein PURH GN=Atic PE=1 SV=2                                  |

|            |                                                                                                                                 |
|------------|---------------------------------------------------------------------------------------------------------------------------------|
| PURB_RAT   | Transcriptional activator protein Pur-beta GN=Purb PE=1 SV=3                                                                    |
| PYC_RAT    | Pyruvate carboxylase, mitochondrial GN=Pc PE=1 SV=2                                                                             |
| PYRD_RAT   | Dihydroorotate dehydrogenase (quinone), mitochondrial GN=Dhodh PE=1 SV=1                                                        |
| Q05BA4_RAT | Myadm protein GN=Myadm PE=2 SV=1                                                                                                |
| Q0ZFS8_RAT | Protein Srsf3 GN=LOC100910660 PE=2 SV=1                                                                                         |
| Q1EG89_RAT | Myocardial ischemic preconditioning associated protein 7 GN=Pxn PE=1 SV=1                                                       |
| Q2I6B2_RAT | V-H+ATPase subunit a1-III GN=Atp6v0a1 PE=2 SV=1                                                                                 |
| Q2IBC6_RAT | Caveolin GN=Cav1 PE=3 SV=1                                                                                                      |
| Q2YDV1_RAT | Dual specificity protein phosphatase GN=Dusp9 PE=2 SV=1                                                                         |
| Q32PX6_RAT | Protein Rhog GN=Rhog PE=2 SV=1                                                                                                  |
| Q32PY8_RAT | Protein Sbsn GN=Sbsn PE=2 SV=1                                                                                                  |
| Q3KR55_RAT | Protein U2af1 GN=U2af1 PE=2 SV=1                                                                                                |
| Q3KR94_RAT | Protein Vtn GN=Vtn PE=2 SV=1                                                                                                    |
| Q3KRC3_RAT | Protein Srpr GN=Srpr PE=2 SV=1                                                                                                  |
| Q3KRE2_RAT | Methyltransferase like 7A GN=Mettl7a PE=2 SV=1                                                                                  |
| Q3KRF2_RAT | High density lipoprotein binding protein (Vigilin) GN=Hdlbp PE=2 SV=1                                                           |
| Q3MHS9_RAT | Chaperonin containing Tcp1, subunit 6A (Zeta 1) GN=Cct6a PE=2 SV=1                                                              |
| Q3MID7_RAT | Lipopolysaccharide binding protein GN=Lbp PE=2 SV=1                                                                             |
| Q3ZAV2_RAT | Uncharacterized protein GN=Ybx1 PE=2 SV=1                                                                                       |
| Q3ZB99_RAT | Protein Tjp2 GN=Tjp2 PE=1 SV=1                                                                                                  |
| Q498C9_RAT | Protein Zfp207 GN=Zfp207 PE=2 SV=1                                                                                              |
| Q498D8_RAT | Protein Rbx1 GN=Rbx1 PE=4 SV=1                                                                                                  |
| Q498N2_RAT | Amine oxidase GN=Aoc1 PE=2 SV=1                                                                                                 |
| Q499Q4_RAT | Phosphoglucomutase 1 GN=Pgm1 PE=2 SV=2                                                                                          |
| Q4FZY1_RAT | Cd68 molecule GN=Cd68 PE=2 SV=1                                                                                                 |
| Q4G079_RAT | Protein Aimp1 GN=Aimp1 PE=2 SV=1                                                                                                |
| Q4KLI0_RAT | Protein Smarcb1 GN=Smarcb1 PE=1 SV=1                                                                                            |
| Q4KLI7_RAT | Protein Sf3a3 GN=Sf3a3 PE=2 SV=1                                                                                                |
| Q4KLK1_RAT | Protein Srsf11 GN=Srsf11 PE=2 SV=1                                                                                              |
| Q4KLK7_RAT | Nucleolar protein 5A GN=Nop56 PE=1 SV=1                                                                                         |
| Q4KLL7_RAT | Protein Vps4b GN=Vps4b PE=2 SV=1                                                                                                |
| Q4KLM7_RAT | Protein Specc1 GN=Specc1 PE=2 SV=1                                                                                              |
| Q4KLZ0_RAT | Protein Vnn1 GN=Vnn1 PE=2 SV=1                                                                                                  |
| Q4KLZ3_RAT | DAZ associated protein 1 GN=Dazap1 PE=2 SV=1                                                                                    |
| Q4KM38_RAT | FUS interacting protein (Serine-arginine rich) 1 GN=Srsf10 PE=2 SV=1                                                            |
| Q4KM87_RAT | Actin-like 6A GN=Actl6a PE=2 SV=1                                                                                               |
| Q4KMA8_RAT | Endoplasmic reticulum aminopeptidase 1 GN=Erp1 PE=2 SV=1                                                                        |
| Q4QQS6_RAT | Asparagine-linked glycosylation 5 homolog (Yeast, dolichyl-phosphate beta-glycosyltransferase), isoform CRA_a GN=Alg5 PE=2 SV=1 |
| Q4QQU3_RAT | Carcinoembryonic antigen-related cell adhesion molecule 11 GN=Ceacam11 PE=2 SV=1                                                |
| Q4QQV0_RAT | Protein Tubb6 GN=Tubb6 PE=2 SV=1                                                                                                |
| Q4QQV4_RAT | Dead end homolog 1 (Zebrafish) GN=Hars PE=2 SV=1                                                                                |
| Q4QR81_RAT | Protein Rbms2 GN=Rbms2 PE=2 SV=1                                                                                                |
| Q4V7D1_RAT | Signal sequence receptor, alpha GN=Ssr1 PE=2 SV=1                                                                               |
| Q4V7D9_RAT | Protein Smpdl3b GN=Smpdl3b PE=2 SV=1                                                                                            |
| Q4V883_RAT | Protein Psg16 GN=Psg16 PE=2 SV=1                                                                                                |
| Q4V894_RAT | Cathepsin R GN=Ctsr PE=2 SV=1                                                                                                   |
| Q4V8H5_RAT | Aspartyl aminopeptidase GN=Dnpep PE=2 SV=1                                                                                      |
| Q4V8I9_RAT | Protein Ugp2 GN=Ugp2 PE=2 SV=1                                                                                                  |
| Q4V8J0_RAT | Carcinoembryonic antigen gene family 4 GN=Cgm4 PE=2 SV=2                                                                        |
| Q4V8K0_RAT | Pregnancy-specific glycoprotein 29 GN=Psg29 PE=2 SV=1                                                                           |
| Q4V8L0_RAT | Metalloproteinase inhibitor 3 GN=Timp3 PE=2 SV=1                                                                                |
| Q4V8N0_RAT | Lipocalin 7, isoform CRA_a GN=Tinagl1 PE=2 SV=1                                                                                 |
| Q4V8P9_RAT | Protein Tfp2c GN=Tfp2c PE=2 SV=1                                                                                                |
| Q4V8Q2_RAT | Protein Spint1 GN=Spint1 PE=2 SV=1                                                                                              |
| Q52KJ9_RAT | Protein Tmx1 GN=Tmx1 PE=2 SV=1                                                                                                  |
| Q566E4_RAT | Heterogeneous nuclear ribonucleoprotein R GN=Hnrnpr PE=2 SV=1                                                                   |
| Q568Z8_RAT | Ddx17 protein GN=Ddx17 PE=2 SV=1                                                                                                |
| Q569C9_RAT | Golgi phosphoprotein 3 GN=Golph3 PE=2 SV=1                                                                                      |
| Q56R17_RAT | Importin subunit alpha GN=Kpna4 PE=2 SV=1                                                                                       |
| Q56R18_RAT | Importin subunit alpha GN=Kpna3 PE=2 SV=1                                                                                       |
| Q56R20_RAT | Importin subunit alpha GN=Kpna1 PE=2 SV=1                                                                                       |

|            |                                                                                                   |
|------------|---------------------------------------------------------------------------------------------------|
| Q5BJP4_RAT | Protein LOC100363776 GN=Rbm39 PE=1 SV=1                                                           |
| Q5BJT9_RAT | Creatine kinase, mitochondrial 1, ubiquitous GN=Ckmt1b PE=2 SV=1                                  |
| Q5BJU0_RAT | Protein Rras2 GN=Rras2 PE=2 SV=1                                                                  |
| Q5BJZ3_RAT | Nicotinamide nucleotide transhydrogenase GN=Nnt PE=2 SV=1                                         |
| Q5BKC4_RAT | C9 protein GN=C9 PE=2 SV=1                                                                        |
| Q5D059_RAT | Hnrpk protein GN=Hnrpk PE=2 SV=1                                                                  |
| Q5EBC0_RAT | Inter alpha-trypsin inhibitor, heavy chain 4 GN=Itih4 PE=2 SV=1                                   |
| Q5EC47_RAT | Protein Slc13a4 GN=Slc13a4 PE=2 SV=1                                                              |
| Q5FVC5_RAT | Poliovirus receptor-related 2 GN=Pvrl2 PE=2 SV=1                                                  |
| Q5FVG4_RAT | Protein LOC100911440 GN=Slc25a22 PE=2 SV=1                                                        |
| Q5FVL8_RAT | ATP-binding cassette, sub-family B (MDR/TAP), member 10 GN=Abcb10 PE=2 SV=1                       |
| Q5I0M1_RAT | Apolipoprotein H GN=ApoH PE=2 SV=1                                                                |
| Q5I0N4_RAT | Estradiol 17-beta-dehydrogenase 2 GN=Hsd17b2 PE=2 SV=1                                            |
| Q5M7T5_RAT | Protein Serpinc1 GN=Serpinc1 PE=2 SV=1                                                            |
| Q5M7T6_RAT | ATPase, H+ transporting, lysosomal 38kDa, V0 subunit d1 GN=Atp6v0d1 PE=2 SV=1                     |
| Q5M860_RAT | Protein Arhgdib GN=Arhgdib PE=2 SV=1                                                              |
| Q5M884_RAT | Protein Eci3 GN=Eci3 PE=2 SV=1                                                                    |
| Q5M891_RAT | C4b-binding protein alpha chain GN=C4bpa PE=2 SV=1                                                |
| Q5M963_RAT | Cytidine monophosphate N-acetylneuraminic acid synthetase GN=Cmas PE=2 SV=1                       |
| Q5M964_RAT | Fumarate hydratase 1 GN=Fh PE=2 SV=1                                                              |
| Q5M9F7_RAT | ARP10 actin-related protein 10 homolog (S. cerevisiae) GN=Actr10 PE=2 SV=1                        |
| Q5M9H2_RAT | Acyl-Coenzyme A dehydrogenase, very long chain GN=Acadvl PE=2 SV=1                                |
| Q5M9H7_RAT | DnaJ (Hsp40) homolog, subfamily A, member 2 GN=Dnaja2 PE=2 SV=1                                   |
| Q5PPG2_RAT | Legumain GN=Lgmn PE=2 SV=1                                                                        |
| Q5PPJ6_RAT | Leucyl-tRNA synthetase GN=Lars PE=2 SV=1                                                          |
| Q5PQK2_RAT | Fusion, derived from t(1216) malignant liposarcoma (Human) GN=Fus PE=2 SV=1                       |
| Q5PQZ9_RAT | NADH dehydrogenase [ubiquinone] 1 subunit C2 GN=Ndufc2 PE=2 SV=1                                  |
| Q5Q0U0_RAT | Protein Slc17a5 GN=Slc17a5 PE=2 SV=1                                                              |
| Q5RJK5_RAT | Chromobox homolog 3 (HP1 gamma homolog, Drosophila) GN=Cbx3 PE=2 SV=1                             |
| Q5RJN0_RAT | NADH dehydrogenase (Ubiquinone) Fe-S protein 7 GN=Ndufs7 PE=2 SV=1                                |
| Q5RJR9_RAT | Serine (Or cysteine) proteinase inhibitor, clade H, member 1, isoform CRA_b GN=Serpinh1 PE=2 SV=1 |
| Q5RK08_RAT | Glioblastoma amplified sequence GN=Gbas PE=2 SV=1                                                 |
| Q5RK10_RAT | 60S ribosomal protein L13a GN=Rpl13a PE=2 SV=1                                                    |
| Q5RKG9_RAT | Eukaryotic translation initiation factor 4B GN=Eif4b PE=2 SV=1                                    |
| Q5RKH2_RAT | Galactokinase 1 GN=Galk1 PE=2 SV=1                                                                |
| Q5RKI5_RAT | Flightless I homolog (Drosophila) GN=Flil PE=2 SV=1                                               |
| Q5RKJ9_RAT | RAB10, member RAS oncogene family GN=Rab10 PE=2 SV=1                                              |
| Q5U1W6_RAT | Apolipoprotein O-like GN=Apool PE=2 SV=1                                                          |
| Q5U1Y3_RAT | Filamin binding LIM protein 1 GN=Fblim1 PE=2 SV=1                                                 |
| Q5U1Z9_RAT | Metaxin 2 GN=Mtx2 PE=2 SV=1                                                                       |
| Q5U214_RAT | Protein Snrpa GN=Snrpa PE=2 SV=1                                                                  |
| Q5U2N2_RAT | Ubiquitin carboxyl-terminal hydrolase GN=Usp14 PE=2 SV=1                                          |
| Q5U2Q5_RAT | Ribonucleoside-diphosphate reductase GN=Rrm1 PE=2 SV=1                                            |
| Q5U2R9_RAT | Protein Scfd2 GN=Scfd2 PE=2 SV=1                                                                  |
| Q5U2S7_RAT | Proteasome (Prosome, macropain) 26S subunit, non-ATPase, 3 GN=Psm3 PE=2 SV=1                      |
| Q5U2U4_RAT | Protein Scamp2 GN=Scamp2 PE=2 SV=1                                                                |
| Q5U2U5_RAT | Perilipin GN=Plin2 PE=2 SV=1                                                                      |
| Q5U2U8_RAT | Bcl2-associated athanogene 3 GN=Bag3 PE=2 SV=1                                                    |
| Q5U2V1_RAT | FK506 binding protein 10 GN=Fkbp10 PE=2 SV=1                                                      |
| Q5U2W0_RAT | Protein Sun1 GN=Sun1 PE=2 SV=1                                                                    |
| Q5U2X8_RAT | Acyl-CoA thioesterase 9 GN=Acot9 PE=2 SV=1                                                        |
| Q5U2Y7_RAT | Protein Wdfy1 GN=Wdfy1 PE=2 SV=1                                                                  |
| Q5U2Z8_RAT | Elongation of very long chain fatty acids protein GN=Elov1 PE=2 SV=1                              |
| Q5U302_RAT | Catenin (Cadherin associated protein), alpha 1 GN=Cttna1 PE=1 SV=1                                |
| Q5U328_RAT | Nucleolin GN=Ncl PE=1 SV=1                                                                        |
| Q5U334_RAT | Poliovirus receptor GN=PVR PE=2 SV=1                                                              |
| Q5U362_RAT | Annexin GN=Anxa4 PE=2 SV=1                                                                        |
| Q5U3Y8_RAT | Basic transcription factor 3 GN=Btf3 PE=2 SV=1                                                    |
| Q5U3Z5_RAT | Bri3 binding protein GN=Bri3bp PE=2 SV=1                                                          |
| Q5U3Z7_RAT | Serine hydroxymethyltransferase GN=Shmt2 PE=2 SV=1                                                |
| Q5VLR5_RAT | BWK4 GN=Erp44 PE=2 SV=1                                                                           |



|            |                                                                                                |
|------------|------------------------------------------------------------------------------------------------|
| Q5XHX3_RAT | Enabled homolog (Drosophila) GN=Enah PE=1 SV=1                                                 |
| Q5XI04_RAT | Protein Stom GN=Stom PE=2 SV=1                                                                 |
| Q5XI19_RAT | Fermitin family homolog 2 (Drosophila) GN=Fermt2 PE=2 SV=1                                     |
| Q5XI21_RAT | Protein Tom1 GN=Tom1 PE=2 SV=1                                                                 |
| Q5XI34_RAT | Protein Ppp2r1a GN=Ppp2r1a PE=2 SV=1                                                           |
| Q5XI77_RAT | Annexin GN=Anxa11 PE=2 SV=1                                                                    |
| Q5XI86_RAT | Peptidyl-tRNA hydrolase 2 GN=Pth2 PE=1 SV=1                                                    |
| Q5XIC6_RAT | Proteasome (Prosome, macropain) 26S subunit, non-ATPase, 12 GN=Psm12 PE=2 SV=1                 |
| Q5XIF0_RAT | Protein Tex264 GN=Tex264 PE=2 SV=1                                                             |
| Q5XIH3_RAT | NADH dehydrogenase (Ubiquinone) flavoprotein 1 GN=Ndufv1 PE=2 SV=1                             |
| Q5XIJ3_RAT | Isocitrate dehydrogenase 3 (NAD), gamma GN=Idh3g PE=2 SV=1                                     |
| Q5XIL4_RAT | Protein Sorbs3 GN=Sorbs3 PE=2 SV=1                                                             |
| Q5XIM0_RAT | BCS1-like (Yeast) GN=Bcs1l PE=2 SV=1                                                           |
| Q5XIM7_RAT | Lysine--tRNA ligase GN=Kars PE=2 SV=1                                                          |
| Q5XIP0_RAT | DnaJ (Hsp40) homolog, subfamily B, member 4 GN=Dnajb4 PE=2 SV=1                                |
| Q5XIU4_RAT | B-cell receptor-associated protein 29 GN=Bcap29 PE=2 SV=1                                      |
| Q62669_RAT | Protein Hbb-b1 GN=Hbb-b1 PE=3 SV=1                                                             |
| Q63116_RAT | Tyrosine-protein kinase receptor GN=Kit PE=2 SV=1                                              |
| Q63545_RAT | Decidual prolactin-related protein GN=Prl8a2 PE=2 SV=1                                         |
| Q64129_RAT | Protein Sdhc GN=Sdhc PE=2 SV=1                                                                 |
| Q642B0_RAT | Glypican 4 GN=Gpc4 PE=2 SV=1                                                                   |
| Q642B4_RAT | C-type lectin domain family 14, member a GN=Clec14a PE=2 SV=1                                  |
| Q642E2_RAT | Protein LOC100362069 GN=LOC100362069 PE=2 SV=1                                                 |
| Q642E3_RAT | CDK5 regulatory subunit associated protein 3, isoform CRA_b GN=Cdk5rap3 PE=2 SV=1              |
| Q66H18_RAT | Protein Sypl1 GN=Sypl1 PE=2 SV=1                                                               |
| Q66H61_RAT | Glutamyl-tRNA synthetase GN=RGD1562301 PE=2 SV=1                                               |
| Q66H91_RAT | G protein-coupled receptor kinase interacting ArfGAP 2 GN=Git2 PE=2 SV=1                       |
| Q66HF3_RAT | Electron transfer flavoprotein-ubiquinone oxidoreductase, mitochondrial GN=Etfdh PE=2 SV=1     |
| Q66HI5_RAT | Ferritin GN=Fth1 PE=2 SV=2                                                                     |
| Q66HL0_RAT | 5' nucleotidase, ecto GN=Nt5e PE=2 SV=2                                                        |
| Q66HL2_RAT | Cortactin GN=Cttn PE=1 SV=1                                                                    |
| Q66HM7_RAT | Lupus La protein homolog GN=Ssb PE=2 SV=1                                                      |
| Q66HP8_RAT | Mitochondrial carnitine/acylcarnitine carrier protein GN=Slc25a20 PE=2 SV=1                    |
| Q66HT5_RAT | Cysteine rich protein 61 GN=Cyr61 PE=2 SV=1                                                    |
| Q68FS8_RAT | Protein Rtcd1 GN=Rtcd1 PE=2 SV=1                                                               |
| Q68FT7_RAT | Phenylalanyl-tRNA synthetase, beta subunit GN=Farsb PE=2 SV=1                                  |
| Q68FT8_RAT | Protein Serpinf2 GN=Serpinf2 PE=2 SV=1                                                         |
| Q68FY4_RAT | Group specific component GN=Gc PE=2 SV=1                                                       |
| Q68FZ8_RAT | Propionyl coenzyme A carboxylase, beta polypeptide GN=Pccb PE=2 SV=1                           |
| Q68G41_RAT | Dodecenoyl-Coenzyme A delta isomerase (3,2 trans-enoyl-Coenzyme A isomerase) GN=Eci1 PE=2 SV=1 |
| Q69DC0_RAT | CDKI protein GN=Cdkn1c PE=2 SV=1                                                               |
| Q69DC1_RAT | CDKI protein long isoform GN=Cdkn1c PE=2 SV=1                                                  |
| Q6AXW2_RAT | Protein Tmod3 GN=Tmod3 PE=2 SV=1                                                               |
| Q6AXX5_RAT | Protein Rdh11 GN=Rdh11 PE=2 SV=1                                                               |
| Q6AY18_RAT | Protein Sar1a GN=Sar1a PE=2 SV=1                                                               |
| Q6AY21_RAT | GTPase activating protein (SH3 domain) binding protein 2 GN=G3bp2 PE=2 SV=1                    |
| Q6AY58_RAT | B-cell receptor-associated protein 31 GN=Bcap31 PE=2 SV=1                                      |
| Q6AYB6_RAT | Protein Syap1 GN=Syap1 PE=2 SV=1                                                               |
| Q6AYD3_RAT | Proliferation-associated 2G4 GN=Pa2g4 PE=2 SV=1                                                |
| Q6AYD5_RAT | G1 to S phase transition 1 GN=Gsp1 PE=2 SV=1                                                   |
| Q6AYF2_RAT | LIM and cysteine-rich domains 1 GN=Lmcd1 PE=2 SV=1                                             |
| Q6AYF8_RAT | Protein Serpinb9 GN=Serpinb9 PE=2 SV=1                                                         |
| Q6AYI1_RAT | DEAD (Asp-Glu-Ala-Asp) box polypeptide 5 GN=Ddx5 PE=1 SV=1                                     |
| Q6AYQ9_RAT | Peptidyl-prolyl cis-trans isomerase GN=Ppic PE=2 SV=1                                          |
| Q6AYR1_RAT | Protein Tfg GN=Tfg PE=1 SV=1                                                                   |
| Q6AYS3_RAT | Protective protein for beta-galactosidase GN=Ctsa PE=2 SV=1                                    |
| Q6AYU5_RAT | Poly(RC) binding protein 2 GN=Pcbp2 PE=2 SV=1                                                  |
| Q6AZ25_RAT | Tropomyosin 1, alpha GN=Tpm1 PE=2 SV=1                                                         |
| Q6AZ26_RAT | C-terminal binding protein 1 GN=Ctbp1 PE=1 SV=1                                                |
| Q6DGF2_RAT | Enthoprotin GN=Clint1 PE=2 SV=1                                                                |
| Q6GMM8_RAT | Long-chain fatty acid transport protein 1 GN=Slc27a1 PE=2 SV=1                                 |

|            |                                                                                            |
|------------|--------------------------------------------------------------------------------------------|
| Q6GQY2_RAT | Multiple coagulation factor deficiency 2 GN=Mcfd2 PE=2 SV=1                                |
| Q6IMX3_RAT | Acetyl-Coenzyme A dehydrogenase, short chain, isoform CRA_a GN=Acads PE=2 SV=1             |
| Q6IMX4_RAT | Lipid phosphate phosphohydrolase 3 GN=Ppap2b PE=2 SV=1                                     |
| Q6IMY8_RAT | Heterogeneous nuclear ribonucleoprotein U GN=Hnrnpu PE=2 SV=1                              |
| Q6IN14_RAT | CD82 antigen GN=Cd82 PE=2 SV=1                                                             |
| Q6IN22_RAT | Cathepsin B GN=Ctsb PE=2 SV=1                                                              |
| Q6IN37_RAT | GM2 ganglioside activator GN=Gm2a PE=2 SV=1                                                |
| Q6IRG9_RAT | AP-3 complex subunit mu-1 GN=Ap3m1 PE=2 SV=1                                               |
| Q6IRJ7_RAT | Annexin GN=Anxa7 PE=2 SV=1                                                                 |
| Q6IRS6_RAT | Fetub protein GN=Fetub PE=2 SV=1                                                           |
| Q6MGB4_RAT | H2-K region expressed gene 4, rat orthologue GN=Slc39a7 PE=2 SV=1                          |
| Q6P3V8_RAT | Eukaryotic translation initiation factor 4A1 GN=Eif4a1 PE=1 SV=1                           |
| Q6P3V9_RAT | 60S ribosomal protein L4 GN=Rpl4 PE=2 SV=1                                                 |
| Q6P685_RAT | Eukaryotic translation initiation factor 2, subunit 2 (Beta) GN=Eif2s2 PE=2 SV=1           |
| Q6P6G4_RAT | 2,3-bisphosphoglycerate mutase GN=Bpgm PE=2 SV=1                                           |
| Q6P6T6_RAT | Cathepsin D GN=Ctsd PE=2 SV=1                                                              |
| Q6P725_RAT | Desmin GN=Des PE=2 SV=1                                                                    |
| Q6P762_RAT | Mannosidase 2, alpha B1 GN=Man2b1 PE=2 SV=1                                                |
| Q6P7A7_RAT | Dolichyl-diphosphooligosaccharide--protein glycosyltransferase subunit 1 GN=Rpn1 PE=2 SV=1 |
| Q6P7B6_RAT | Ephrin B1 GN=Efnb1 PE=2 SV=1                                                               |
| Q6P7Q6_RAT | Galectin GN=Lgals9 PE=2 SV=1                                                               |
| Q6P9U0_RAT | Protein Serpinb6 GN=Serpib6 PE=2 SV=1                                                      |
| Q6P9V1_RAT | CD81 antigen GN=Cd81 PE=2 SV=1                                                             |
| Q6P9V6_RAT | Proteasome subunit alpha type GN=Pasma5 PE=2 SV=1                                          |
| Q6P9V7_RAT | Proteasome (Prosome, macropain) activator subunit 1 GN=Psm1 PE=2 SV=1                      |
| Q6P9X2_RAT | RCG24868, isoform CRA_e GN=Sec11a PE=2 SV=1                                                |
| Q6P9Y4_RAT | ADP/ATP translocase 1 GN=Slc25a4 PE=1 SV=1                                                 |
| Q6PCT9_RAT | Proteasome (Prosome, macropain) 26S subunit, non-ATPase, 6 GN=Psm6 PE=2 SV=1               |
| Q6PCU4_RAT | Emd protein GN=Emd PE=2 SV=1                                                               |
| Q6PDV6_RAT | 40S ribosomal protein S14 GN=Rps14 PE=2 SV=1                                               |
| Q6PDW1_RAT | 40S ribosomal protein S12 GN=Rps12 PE=2 SV=1                                               |
| Q6PDW2_RAT | Protein LOC100361103 GN=LOC100361103 PE=2 SV=1                                             |
| Q6PDW4_RAT | Proteasome subunit beta type GN=Psm1 PE=2 SV=1                                             |
| Q6QI16_RAT | LRRGT00192 GN=RGD1304704 PE=2 SV=1                                                         |
| Q6QI86_RAT | Haloacid dehalogenase-like hydrolase domain-containing protein 2 GN=Hdhd2 PE=2 SV=1        |
| Q6TUD3_RAT | LRRGT00111 GN=Rdh11 PE=2 SV=1                                                              |
| Q6TUG7_RAT | LRRGT00077 PE=2 SV=1                                                                       |
| Q6TUH4_RAT | LRRGT00070 GN=Thoc1 PE=2 SV=1                                                              |
| Q6TXE9_RAT | LRRGT00050 GN=Eprs PE=1 SV=1                                                               |
| Q6TXI6_RAT | LRRGT00013 GN=LOC317456 PE=2 SV=1                                                          |
| Q6XDA0_RAT | Erythroid spectrin beta GN=Sptb PE=2 SV=1                                                  |
| Q70AM4_RAT | Kinesin 13B GN=Kif13b PE=2 SV=1                                                            |
| Q7TMC7_RAT | Ab2-417 GN=Tf PE=2 SV=1                                                                    |
| Q7TMZ5_RAT | ADP-ribosylation factor-like 6 interacting protein 1 GN=Arl6ip1 PE=2 SV=1                  |
| Q7TP05_RAT | Da1-24 GN=Cfb PE=2 SV=1                                                                    |
| Q7TP14_RAT | Cc1-9 GN=Chid1 PE=2 SV=1                                                                   |
| Q7TP42_RAT | Ab2-292 GN=Sec62 PE=2 SV=1                                                                 |
| Q7TP78_RAT | Aa2-258 GN=Ndufa8 PE=2 SV=1                                                                |
| Q7TPI8_RAT | Ac2-256 GN=Yipf5 PE=2 SV=1                                                                 |
| Q7TQ70_RAT | Ac1873 GN=Fga PE=2 SV=1                                                                    |
| Q7TQ85_RAT | Ac1164 GN=Pdhx PE=2 SV=1                                                                   |
| Q7TQ86_RAT | Ac1158 GN=Rsl1d1 PE=2 SV=1                                                                 |
| Q7TS62_RAT | Bcl-2-like protein 1 GN=Bcl2l1 PE=2 SV=1                                                   |
| Q80ZA3_RAT | Alpha-2 antiplasmin GN=Serpinf1 PE=2 SV=1                                                  |
| Q8BHI5_RAT | O-acyltransferase GN=Dgat1 PE=2 SV=1                                                       |
| Q8R3Z7_RAT | EH-domain containing 4 GN=Ehd4 PE=2 SV=1                                                   |
| Q8SEZ5_RAT | Cytochrome c oxidase subunit 2 GN=Mt-co2 PE=3 SV=1                                         |
| Q8SEZ6_RAT | Cytochrome c oxidase subunit 1 GN=COI PE=3 SV=1                                            |
| Q99JC6_RAT | Protein Tapbp GN=Tapbp PE=2 SV=1                                                           |
| Q99PV2_RAT | Protein Stxbp3 GN=Stxbp3 PE=2 SV=1                                                         |
| Q9ET50_RAT | Protein Stau1 GN=Stau1 PE=2 SV=1                                                           |

|            |                                                                                        |
|------------|----------------------------------------------------------------------------------------|
| Q9JI56_RAT | Synaptosomal-associated protein GN=Snap29 PE=2 SV=1                                    |
| Q9JJI7_RAT | Suppressor of tumorigenicity 14 protein homolog GN=St14 PE=2 SV=1                      |
| Q9JK59_RAT | BAK protein GN=Bak1 PE=2 SV=1                                                          |
| Q9JK64_RAT | Multidrug resistance protein 1a GN=Abcb1a PE=2 SV=1                                    |
| Q9JKB7_RAT | Guanine deaminase GN=Gda PE=2 SV=1                                                     |
| Q9JMB3_RAT | Erythrocyte protein band 4.1-like 3, isoform CRA_d GN=Epb41i3 PE=2 SV=1                |
| Q9QX80_RAT | CaRg-binding factor A GN=Hnnpab PE=2 SV=1                                              |
| Q9WVJ6_RAT | Protein Tgm2 GN=Tgm2 PE=2 SV=1                                                         |
| Q9Z1J7_RAT | Protein Slc1a5 GN=Slc1a5 PE=2 SV=1                                                     |
| QCR1_RAT   | Cytochrome b-c1 complex subunit 1, mitochondrial GN=Uqcrc1 PE=1 SV=1                   |
| QCR2_RAT   | Cytochrome b-c1 complex subunit 2, mitochondrial GN=Uqcrc2 PE=1 SV=2                   |
| QCR6_RAT   | Cytochrome b-c1 complex subunit 6, mitochondrial GN=Uqcrh PE=3 SV=1                    |
| QKI_RAT    | Protein quaking GN=Qki PE=1 SV=2                                                       |
| R9PXR7_RAT | Prostaglandin E synthase 3 (Fragment) GN=Ptges3 PE=1 SV=1                              |
| R9PXT6_RAT | Focal adhesion kinase 1 GN=Ptk2 PE=4 SV=1                                              |
| R9PXT7_RAT | Macrophage metalloelastase GN=Mmp12 PE=4 SV=1                                          |
| R9PXU3_RAT | Protein kinase C and casein kinase substrate in neurons 2 protein GN=Pacsin2 PE=4 SV=1 |
| R9PXU4_RAT | Thioredoxin reductase 1, cytoplasmic GN=Txnrd1 PE=3 SV=1                               |
| R9PXU9_RAT | Osteoclast-stimulating factor 1 (Fragment) GN=Ostf1 PE=4 SV=1                          |
| R9PXW7_RAT | Stress-induced-phosphoprotein 1 GN=Stip1 PE=4 SV=1                                     |
| R9PXZ2_RAT | Heterogeneous nuclear ribonucleoprotein Q (Fragment) GN=Syncrip PE=4 SV=1              |
| R9PXZ5_RAT | Sortilin GN=Sort1 PE=4 SV=1                                                            |
| R9PY07_RAT | Phosphatidylinositol transfer protein beta isoform (Fragment) GN=Pitpnb PE=4 SV=1      |
| R9PY09_RAT | Protein kinase C and casein kinase substrate in neurons 2 protein GN=Pacsin2 PE=4 SV=1 |
| R9PY10_RAT | Taste receptor type 1 member 2 (Fragment) GN=Tas1r2 PE=3 SV=1                          |
| RAB14_RAT  | Ras-related protein Rab-14 GN=Rab14 PE=1 SV=3                                          |
| RAB18_RAT  | Ras-related protein Rab-18 GN=Rab18 PE=2 SV=1                                          |
| RAB1A_RAT  | Ras-related protein Rab-1A GN=Rab1A PE=1 SV=3                                          |
| RAB21_RAT  | Ras-related protein Rab-21 GN=Rab21 PE=2 SV=1                                          |
| RAB2A_RAT  | Ras-related protein Rab-2A GN=Rab2a PE=1 SV=1                                          |
| RAB35_RAT  | Ras-related protein Rab-35 GN=Rab35 PE=1 SV=1                                          |
| RAB6A_RAT  | Ras-related protein Rab-6A GN=Rab6a PE=2 SV=2                                          |
| RAB7A_RAT  | Ras-related protein Rab-7a GN=Rab7a PE=1 SV=2                                          |
| RAB8A_RAT  | Ras-related protein Rab-8A GN=Rab8a PE=1 SV=2                                          |
| RAB8B_RAT  | Ras-related protein Rab-8B GN=Rab8b PE=1 SV=1                                          |
| RAC1_RAT   | Ras-related C3 botulinum toxin substrate 1 GN=Rac1 PE=1 SV=1                           |
| RAE1L_RAT  | mRNA export factor GN=Rae1 PE=1 SV=1                                                   |
| RALA_RAT   | Ras-related protein Ral-A GN=Rala PE=1 SV=1                                            |
| RALB_RAT   | Ras-related protein Ral-B GN=Ralb PE=2 SV=1                                            |
| RAN_RAT    | GTP-binding nuclear protein Ran GN=Ran PE=1 SV=3                                       |
| RAP1A_RAT  | Ras-related protein Rap-1A GN=Rap1a PE=1 SV=1                                          |
| RAP1B_RAT  | Ras-related protein Rap-1b GN=Rap1b PE=2 SV=2                                          |
| RB11B_RAT  | Ras-related protein Rab-11B GN=Rab11b PE=1 SV=4                                        |
| RB27B_RAT  | Ras-related protein Rab-27B GN=Rab27b PE=2 SV=3                                        |
| RB6I2_RAT  | ELKS/Rab6-interacting/CAST family member 1 GN=Erc1 PE=1 SV=1                           |
| RBBP7_RAT  | Histone-binding protein RBBP7 GN=Rbbp7 PE=2 SV=1                                       |
| RBGPR_RAT  | Rab3 GTPase-activating protein non-catalytic subunit GN=Rab3gap2 PE=1 SV=2             |
| RBM8A_RAT  | RNA-binding protein 8A GN=Rbm8a PE=2 SV=1                                              |
| RBMS1_RAT  | RNA-binding motif, single-stranded-interacting protein 1 GN=Rbms1 PE=2 SV=1            |
| RCD1_RAT   | Cell differentiation protein RCD1 homolog GN=Rqcd1 PE=1 SV=1                           |
| RCN2_RAT   | Reticulocalbin-2 GN=Rcn2 PE=1 SV=2                                                     |
| RD23B_RAT  | UV excision repair protein RAD23 homolog B GN=Rad23b PE=1 SV=1                         |
| RED_RAT    | Protein Red GN=lk PE=1 SV=1                                                            |
| REEP5_RAT  | Receptor expression-enhancing protein 5 GN=Reep5 PE=1 SV=1                             |
| REEP6_RAT  | Receptor expression-enhancing protein 6 GN=Reep6 PE=2 SV=1                             |
| RER1_RAT   | Protein RER1 GN=Rer1 PE=2 SV=1                                                         |
| RET1_RAT   | Retinol-binding protein 1 GN=Rbp1 PE=1 SV=2                                            |
| RHOA_RAT   | Transforming protein RhoA GN=Rhoa PE=1 SV=1                                            |
| RHOB_RAT   | Rho-related GTP-binding protein RhoB GN=Rhob PE=1 SV=1                                 |
| RINI_RAT   | Ribonuclease inhibitor GN=Rnh1 PE=1 SV=2                                               |
| RIPL1_RAT  | RILP-like protein 1 GN=Rilpl1 PE=1 SV=1                                                |

|           |                                                                                            |
|-----------|--------------------------------------------------------------------------------------------|
| RISC_RAT  | Retinoid-inducible serine carboxypeptidase GN=Scepe1 PE=2 SV=1                             |
| RL10A_RAT | 60S ribosomal protein L10a GN=Rpl10a PE=1 SV=2                                             |
| RL10_RAT  | 60S ribosomal protein L10 GN=Rpl10 PE=1 SV=3                                               |
| RL11_RAT  | 60S ribosomal protein L11 GN=Rpl11 PE=1 SV=2                                               |
| RL12_RAT  | 60S ribosomal protein L12 GN=Rpl12 PE=2 SV=1                                               |
| RL13_RAT  | 60S ribosomal protein L13 GN=Rpl13 PE=1 SV=2                                               |
| RL14_RAT  | 60S ribosomal protein L14 GN=Rpl14 PE=1 SV=3                                               |
| RL15_RAT  | 60S ribosomal protein L15 GN=Rpl15 PE=1 SV=2                                               |
| RL17_RAT  | 60S ribosomal protein L17 GN=Rpl17 PE=2 SV=3                                               |
| RL18A_RAT | 60S ribosomal protein L18a GN=Rpl18a PE=2 SV=1                                             |
| RL18_RAT  | 60S ribosomal protein L18 GN=Rpl18 PE=2 SV=2                                               |
| RL19_RAT  | 60S ribosomal protein L19 GN=Rpl19 PE=1 SV=1                                               |
| RL23A_RAT | 60S ribosomal protein L23a GN=Rpl23a PE=2 SV=1                                             |
| RL23_RAT  | 60S ribosomal protein L23 GN=Rpl23 PE=2 SV=1                                               |
| RL24_RAT  | 60S ribosomal protein L24 GN=Rpl24 PE=2 SV=1                                               |
| RL27A_RAT | 60S ribosomal protein L27a GN=Rpl27a PE=1 SV=3                                             |
| RL27_RAT  | 60S ribosomal protein L27 GN=Rpl27 PE=2 SV=2                                               |
| RL30_RAT  | 60S ribosomal protein L30 GN=Rpl30 PE=3 SV=2                                               |
| RL31_RAT  | 60S ribosomal protein L31 GN=Rpl31 PE=2 SV=1                                               |
| RL32_RAT  | 60S ribosomal protein L32 GN=Rpl32 PE=1 SV=2                                               |
| RL35A_RAT | 60S ribosomal protein L35a GN=Rpl35a PE=3 SV=1                                             |
| RL35_RAT  | 60S ribosomal protein L35 GN=Rpl35 PE=1 SV=3                                               |
| RL36A_RAT | 60S ribosomal protein L36a GN=Rpl36a PE=1 SV=2                                             |
| RL37P_RAT | Putative 60S ribosomal protein L37a GN=Rpl37a-ps1 PE=5 SV=2                                |
| RL38_RAT  | 60S ribosomal protein L38 GN=Rpl38 PE=1 SV=2                                               |
| RL3_RAT   | 60S ribosomal protein L3 GN=Rpl3 PE=1 SV=3                                                 |
| RL5_RAT   | 60S ribosomal protein L5 GN=Rpl5 PE=1 SV=3                                                 |
| RL6_RAT   | 60S ribosomal protein L6 GN=Rpl6 PE=1 SV=5                                                 |
| RL7A_RAT  | 60S ribosomal protein L7a GN=Rpl7a PE=1 SV=2                                               |
| RL8_RAT   | 60S ribosomal protein L8 GN=Rpl8 PE=2 SV=2                                                 |
| RL9_RAT   | 60S ribosomal protein L9 GN=Rpl9 PE=1 SV=1                                                 |
| RLA0_RAT  | 60S acidic ribosomal protein P0 GN=Rplp0 PE=1 SV=2                                         |
| RLA1_RAT  | 60S acidic ribosomal protein P1 GN=Rplp1 PE=3 SV=1                                         |
| RLA2_RAT  | 60S acidic ribosomal protein P2 GN=Rplp2 PE=1 SV=2                                         |
| RMXRL_RAT | RNA-binding motif protein, X chromosome retrogene-like GN=Rbmxrtl PE=3 SV=1                |
| RNPS1_RAT | RNA-binding protein with serine-rich domain 1 GN=Rnps1 PE=2 SV=1                           |
| ROA1_RAT  | Heterogeneous nuclear ribonucleoprotein A1 GN=Hnrnpa1 PE=1 SV=3                            |
| ROCK2_RAT | Rho-associated protein kinase 2 GN=Rock2 PE=1 SV=2                                         |
| RPN2_RAT  | Dolichyl-diphosphooligosaccharide--protein glycosyltransferase subunit 2 GN=Rpn2 PE=2 SV=2 |
| RRAS_RAT  | Ras-related protein R-Ras GN=Rras PE=1 SV=1                                                |
| RS10_RAT  | 40S ribosomal protein S10 GN=Rps10 PE=2 SV=1                                               |
| RS11_RAT  | 40S ribosomal protein S11 GN=Rps11 PE=1 SV=3                                               |
| RS13_RAT  | 40S ribosomal protein S13 GN=Rps13 PE=1 SV=2                                               |
| RS14_RAT  | 40S ribosomal protein S14 GN=Rps14 PE=2 SV=3                                               |
| RS15A_RAT | 40S ribosomal protein S15a GN=Rps15a PE=1 SV=2                                             |
| RS15_RAT  | 40S ribosomal protein S15 GN=Rps15 PE=1 SV=2                                               |
| RS16_RAT  | 40S ribosomal protein S16 GN=Rps16 PE=1 SV=2                                               |
| RS17_RAT  | 40S ribosomal protein S17 GN=Rps17 PE=1 SV=3                                               |
| RS18_RAT  | 40S ribosomal protein S18 GN=Rps18 PE=1 SV=3                                               |
| RS19_RAT  | 40S ribosomal protein S19 GN=Rps19 PE=2 SV=3                                               |
| RS20_RAT  | 40S ribosomal protein S20 GN=Rps20 PE=3 SV=1                                               |
| RS21_RAT  | 40S ribosomal protein S21 GN=Rps21 PE=1 SV=1                                               |
| RS23_RAT  | 40S ribosomal protein S23 GN=Rps23 PE=1 SV=3                                               |
| RS25_RAT  | 40S ribosomal protein S25 GN=Rps25 PE=2 SV=1                                               |
| RS26_RAT  | 40S ribosomal protein S26 GN=Rps26 PE=3 SV=3                                               |
| RS27A_RAT | Ubiquitin-40S ribosomal protein S27a GN=Rps27a PE=1 SV=2                                   |
| RS27_RAT  | 40S ribosomal protein S27 GN=Rps27 PE=2 SV=3                                               |
| RS28_RAT  | 40S ribosomal protein S28 GN=Rps28 PE=1 SV=1                                               |
| RS2_RAT   | 40S ribosomal protein S2 GN=Rps2 PE=1 SV=1                                                 |
| RS30_RAT  | 40S ribosomal protein S30 GN=Fau PE=1 SV=1                                                 |
| RS3A_RAT  | 40S ribosomal protein S3a GN=Rps3a PE=1 SV=2                                               |

|           |                                                                                            |
|-----------|--------------------------------------------------------------------------------------------|
| RS3_RAT   | 40S ribosomal protein S3 GN=Rps3 PE=1 SV=1                                                 |
| RS4X_RAT  | 40S ribosomal protein S4, X isoform GN=Rps4x PE=2 SV=2                                     |
| RS6_RAT   | 40S ribosomal protein S6 GN=Rps6 PE=1 SV=1                                                 |
| RS7_RAT   | 40S ribosomal protein S7 GN=Rps7 PE=1 SV=1                                                 |
| RS8_RAT   | 40S ribosomal protein S8 GN=Rps8 PE=1 SV=2                                                 |
| RS9_RAT   | 40S ribosomal protein S9 GN=Rps9 PE=1 SV=4                                                 |
| RSAD2_RAT | Radical S-adenosyl methionine domain-containing protein 2 GN=Rsad2 PE=1 SV=1               |
| RSMN_RAT  | Small nuclear ribonucleoprotein-associated protein N GN=Snrpn PE=2 SV=1                    |
| RSSA_RAT  | 40S ribosomal protein SA GN=Rpsa PE=1 SV=3                                                 |
| RTCB_RAT  | tRNA-splicing ligase RtcB homolog GN=Rtcb PE=2 SV=1                                        |
| RU1C_RAT  | U1 small nuclear ribonucleoprotein C GN=Snrpc PE=3 SV=1                                    |
| RUVB1_RAT | RuvB-like 1 GN=Ruvbl1 PE=1 SV=1                                                            |
| S10A4_RAT | Protein S100-A4 GN=S100a4 PE=2 SV=1                                                        |
| S10A6_RAT | Protein S100-A6 GN=S100a6 PE=1 SV=3                                                        |
| S10A8_RAT | Protein S100-A8 GN=S100a8 PE=1 SV=3                                                        |
| S10A9_RAT | Protein S100-A9 GN=S100a9 PE=1 SV=3                                                        |
| S10AA_RAT | Protein S100-A10 GN=S100a10 PE=1 SV=2                                                      |
| S10AB_RAT | Protein S100-A11 GN=S100a11 PE=3 SV=1                                                      |
| S12A4_RAT | Solute carrier family 12 member 4 GN=Slc12a4 PE=1 SV=1                                     |
| S12A7_RAT | Solute carrier family 12 member 7 GN=Slc12a7 PE=2 SV=2                                     |
| S12A9_RAT | Solute carrier family 12 member 9 GN=Slc12a9 PE=2 SV=1                                     |
| S22A3_RAT | Solute carrier family 22 member 3 GN=Slc22a3 PE=2 SV=1                                     |
| S29A1_RAT | Equilibrative nucleoside transporter 1 GN=Slc29a1 PE=2 SV=3                                |
| S38A4_RAT | Sodium-coupled neutral amino acid transporter 4 GN=Slc38a4 PE=2 SV=1                       |
| S40A1_RAT | Solute carrier family 40 member 1 GN=Slc40a1 PE=2 SV=2                                     |
| S47A1_RAT | Multidrug and toxin extrusion protein 1 GN=Slc47a1 PE=1 SV=1                               |
| S61A1_RAT | Protein transport protein Sec61 subunit alpha isoform 1 GN=Sec61a1 PE=2 SV=2               |
| S6A12_RAT | Sodium- and chloride-dependent betaine transporter GN=Slc6a12 PE=2 SV=1                    |
| SAC1_RAT  | Phosphatidylinositide phosphatase SAC1 GN=Sacm1 PE=1 SV=1                                  |
| SAHH_RAT  | Adenosylhomocysteinase GN=Ahcy PE=1 SV=3                                                   |
| SAM50_RAT | Sorting and assembly machinery component 50 homolog GN=Samm50 PE=1 SV=1                    |
| SAP_RAT   | Sulfated glycoprotein 1 GN=Psap PE=1 SV=1                                                  |
| SARNP_RAT | SAP domain-containing ribonucleoprotein GN=Sarnp PE=1 SV=3                                 |
| SBDS_RAT  | Ribosome maturation protein SBDS GN=Sbds PE=2 SV=1                                         |
| SC11A_RAT | Signal peptidase complex catalytic subunit SEC11A GN=Sec11a PE=2 SV=1                      |
| SC11C_RAT | Signal peptidase complex catalytic subunit SEC11C GN=Sec11c PE=2 SV=3                      |
| SC22B_RAT | Vesicle-trafficking protein SEC22b GN=Sec22b PE=1 SV=3                                     |
| SCAM1_RAT | Secretory carrier-associated membrane protein 1 GN=Scamp1 PE=1 SV=1                        |
| SCFD1_RAT | Sec1 family domain-containing protein 1 GN=Scfd1 PE=1 SV=1                                 |
| SCOT1_RAT | Succinyl-CoA:3-ketoacid coenzyme A transferase 1, mitochondrial GN=Oxct1 PE=1 SV=1         |
| SCPDL_RAT | Saccharopine dehydrogenase-like oxidoreductase GN=Sccpdh PE=2 SV=1                         |
| SCRB2_RAT | Lysosome membrane protein 2 GN=Scarb2 PE=1 SV=2                                            |
| SDHA_RAT  | Succinate dehydrogenase [ubiquinone] flavoprotein subunit, mitochondrial GN=Sdha PE=1 SV=1 |
| SDHB_RAT  | Succinate dehydrogenase [ubiquinone] iron-sulfur subunit, mitochondrial GN=Sdhb PE=2 SV=2  |
| SDPR_RAT  | Serum deprivation-response protein GN=Sdpr PE=1 SV=3                                       |
| SEC13_RAT | Protein SEC13 homolog GN=Sec13 PE=1 SV=1                                                   |
| SEC20_RAT | Vesicle transport protein SEC20 GN=Bnip1 PE=2 SV=1                                         |
| SELS_RAT  | Selenoprotein S GN=Vimp PE=2 SV=3                                                          |
| SEP15_RAT | 15 kDa selenoprotein GN=Sep15 PE=1 SV=3                                                    |
| SEPP1_RAT | Selenoprotein P GN=Sepp1 PE=1 SV=2                                                         |
| SEPT2_RAT | Septin-2 GN=Sept2 PE=1 SV=1                                                                |
| SEPT7_RAT | Septin-7 GN=Sept7 PE=1 SV=1                                                                |
| SEPT8_RAT | Septin-8 GN=Sept8 PE=1 SV=1                                                                |
| SERA_RAT  | D-3-phosphoglycerate dehydrogenase GN=Phgdh PE=1 SV=3                                      |
| SF3A2_RAT | Splicing factor 3A subunit 2 GN=Sf3a2 PE=2 SV=1                                            |
| SF3B4_RAT | Splicing factor 3B subunit 4 GN=Sf3b4 PE=2 SV=1                                            |
| SFXN1_RAT | Sideroflexin-1 GN=Sfxn1 PE=2 SV=4                                                          |
| SFXN3_RAT | Sideroflexin-3 GN=Sfxn3 PE=2 SV=1                                                          |
| SGPL1_RAT | Sphingosine-1-phosphate lyase 1 GN=Sgpl1 PE=2 SV=1                                         |
| SGTA_RAT  | Small glutamine-rich tetratricopeptide repeat-containing protein alpha GN=Sgta PE=1 SV=1   |
| SH3G1_RAT | Endophilin-A2 GN=Sh3g1 PE=1 SV=1                                                           |

|           |                                                                                        |
|-----------|----------------------------------------------------------------------------------------|
| SHLB1_RAT | Endophilin-B1 GN=Sh3glb1 PE=2 SV=1                                                     |
| SIL1_RAT  | Nucleotide exchange factor SIL1 GN=Sil1 PE=2 SV=1                                      |
| SKP1_RAT  | S-phase kinase-associated protein 1 GN=Skp1 PE=2 SV=3                                  |
| SLK_RAT   | STE20-like serine/threonine-protein kinase GN=Slk PE=2 SV=1                            |
| SMC1A_RAT | Structural maintenance of chromosomes protein 1A GN=Smc1a PE=1 SV=1                    |
| SMC3_RAT  | Structural maintenance of chromosomes protein 3 GN=Smc3 PE=1 SV=1                      |
| SMCA4_RAT | Transcription activator BRG1 GN=Smarca4 PE=1 SV=1                                      |
| SMU1_RAT  | WD40 repeat-containing protein SMU1 GN=Smu1 PE=2 SV=1                                  |
| SNAA_RAT  | Alpha-soluble NSF attachment protein GN=Napa PE=1 SV=2                                 |
| SND1_RAT  | Staphylococcal nuclease domain-containing protein 1 GN=Snd1 PE=2 SV=1                  |
| SNP23_RAT | Synaptosomal-associated protein 23 GN=Snap23 PE=1 SV=1                                 |
| SNUT1_RAT | U4/U6.U5 tri-snRNP-associated protein 1 GN=Sart1 PE=2 SV=1                             |
| SNX1_RAT  | Sorting nexin-1 GN=Snx1 PE=1 SV=1                                                      |
| SNX3_RAT  | Sorting nexin-3 GN=Snx3 PE=1 SV=1                                                      |
| SNX5_RAT  | Sorting nexin-5 GN=Snx5 PE=1 SV=1                                                      |
| SODC_RAT  | Superoxide dismutase [Cu-Zn] GN=Sod1 PE=1 SV=2                                         |
| SODM_RAT  | Superoxide dismutase [Mn], mitochondrial GN=Sod2 PE=1 SV=2                             |
| SORT_RAT  | Sortilin GN=Sort1 PE=1 SV=3                                                            |
| SPA3K_RAT | Serine protease inhibitor A3K GN=Serpina3k PE=1 SV=3                                   |
| SPA3L_RAT | Serine protease inhibitor A3L GN=Serpina3l PE=1 SV=3                                   |
| SPA3N_RAT | Serine protease inhibitor A3N GN=Serpina3n PE=1 SV=3                                   |
| SPP24_RAT | Secreted phosphoprotein 24 GN=Spp2 PE=2 SV=2                                           |
| SPRC_RAT  | SPARC GN=Sparc PE=1 SV=4                                                               |
| SPRE_RAT  | Sepiapterin reductase GN=Spr PE=1 SV=1                                                 |
| SPRY7_RAT | SPRY domain-containing protein 7 GN=Spryd7 PE=2 SV=1                                   |
| SPTN1_RAT | Spectrin alpha chain, non-erythrocytic 1 GN=Sptan1 PE=1 SV=2                           |
| SRP54_RAT | Signal recognition particle 54 kDa protein GN=Srp54 PE=2 SV=1                          |
| SRSF2_RAT | Serine/arginine-rich splicing factor 2 GN=Srsf2 PE=1 SV=3                              |
| SRSF6_RAT | Serine/arginine-rich splicing factor 6 GN=Srsf6 PE=1 SV=1                              |
| SSRD_RAT  | Translocon-associated protein subunit delta GN=Ssr4 PE=2 SV=1                          |
| SSRG_RAT  | Translocon-associated protein subunit gamma GN=Ssr3 PE=2 SV=2                          |
| SSRP1_RAT | FACT complex subunit SSRP1 GN=Ssrp1 PE=1 SV=2                                          |
| STAT3_RAT | Signal transducer and activator of transcription 3 GN=Stat3 PE=1 SV=1                  |
| STEA3_RAT | Metalloreductase STEAP3 GN=Steap3 PE=2 SV=1                                            |
| STIM1_RAT | Stromal interaction molecule 1 GN=Stim1 PE=1 SV=1                                      |
| STIP1_RAT | Stress-induced-phosphoprotein 1 GN=Stip1 PE=1 SV=1                                     |
| STK10_RAT | Serine/threonine-protein kinase 10 GN=Stk10 PE=3 SV=1                                  |
| STML2_RAT | Stomatin-like protein 2, mitochondrial GN=Stoml2 PE=1 SV=1                             |
| STRA6_RAT | Stimulated by retinoic acid gene 6 protein homolog GN=Stra6 PE=2 SV=1                  |
| STRAP_RAT | Serine-threonine kinase receptor-associated protein GN=Strap PE=1 SV=1                 |
| STRN_RAT  | Striatin GN=Strn PE=1 SV=1                                                             |
| STX12_RAT | Syntaxin-12 GN=Stx12 PE=1 SV=1                                                         |
| STX7_RAT  | Syntaxin-7 GN=Stx7 PE=1 SV=4                                                           |
| STXB2_RAT | Syntaxin-binding protein 2 GN=Stxbp2 PE=2 SV=1                                         |
| SUCA_RAT  | Succinyl-CoA ligase [ADP/GDP-forming] subunit alpha, mitochondrial GN=Suclg1 PE=2 SV=2 |
| SUGT1_RAT | Suppressor of G2 allele of SKP1 homolog GN=Sugt1 PE=2 SV=1                             |
| SYAC_RAT  | Alanine--tRNA ligase, cytoplasmic GN=Aars PE=1 SV=3                                    |
| SYDC_RAT  | Aspartate--tRNA ligase, cytoplasmic GN=Dars PE=2 SV=1                                  |
| SYFA_RAT  | Phenylalanine--tRNA ligase alpha subunit GN=Farsa PE=1 SV=1                            |
| SYG_RAT   | Glycine--tRNA ligase (Fragment) GN=Gars PE=1 SV=1                                      |
| SYJ2B_RAT | Synaptojanin-2-binding protein GN=Synj2bp PE=1 SV=2                                    |
| SYRC_RAT  | Arginine--tRNA ligase, cytoplasmic GN=Rars PE=1 SV=2                                   |
| SYSC_RAT  | Serine--tRNA ligase, cytoplasmic GN=Sars PE=1 SV=3                                     |
| SYTC_RAT  | Threonine--tRNA ligase, cytoplasmic GN=Tars PE=2 SV=1                                  |
| SYVC_RAT  | Valine--tRNA ligase GN=Vars PE=2 SV=2                                                  |
| SYWC_RAT  | Tryptophan--tRNA ligase, cytoplasmic GN=Wars PE=1 SV=2                                 |
| SYYC_RAT  | Tyrosine--tRNA ligase, cytoplasmic GN=Yars PE=2 SV=3                                   |
| T120A_RAT | Transmembrane protein 120A GN=Tmem120a PE=2 SV=1                                       |
| T150A_RAT | Transmembrane protein 150A GN=Tmem150a PE=2 SV=1                                       |
| TAGL2_RAT | Transgelin-2 GN=Tagln2 PE=2 SV=1                                                       |
| TAGL_RAT  | Transgelin GN=Tagln PE=1 SV=2                                                          |

|           |                                                                                    |
|-----------|------------------------------------------------------------------------------------|
| TALDO_RAT | Transaldolase GN=Taldo1 PE=1 SV=2                                                  |
| TBA1B_RAT | Tubulin alpha-1B chain GN=Tuba1b PE=1 SV=1                                         |
| TBA1C_RAT | Tubulin alpha-1C chain GN=Tuba1c PE=1 SV=1                                         |
| TBA4A_RAT | Tubulin alpha-4A chain GN=Tuba4a PE=2 SV=1                                         |
| TBB2B_RAT | Tubulin beta-2B chain GN=Tubb2b PE=1 SV=1                                          |
| TBB3_RAT  | Tubulin beta-3 chain GN=Tubb3 PE=1 SV=1                                            |
| TBL3_RAT  | Transducin beta-like protein 3 GN=Tbl3 PE=2 SV=1                                   |
| TCP4_RAT  | Activated RNA polymerase II transcriptional coactivator p15 GN=Sub1 PE=2 SV=3      |
| TCPA_RAT  | T-complex protein 1 subunit alpha GN=Tcp1 PE=1 SV=1                                |
| TCPB_RAT  | T-complex protein 1 subunit beta GN=Cct2 PE=1 SV=3                                 |
| TCPD_RAT  | T-complex protein 1 subunit delta GN=Cct4 PE=1 SV=3                                |
| TCPE_RAT  | T-complex protein 1 subunit epsilon GN=Cct5 PE=1 SV=1                              |
| TCPG_RAT  | T-complex protein 1 subunit gamma GN=Cct3 PE=1 SV=1                                |
| TCTP_RAT  | Translationally-controlled tumor protein GN=Tpt1 PE=1 SV=1                         |
| TECR_RAT  | Very-long-chain enoyl-CoA reductase GN=Tecr PE=2 SV=1                              |
| TERA_RAT  | Transitional endoplasmic reticulum ATPase GN=Vcp PE=1 SV=3                         |
| TFAM_RAT  | Transcription factor A, mitochondrial GN=Tfam PE=2 SV=1                            |
| TFPI1_RAT | Tissue factor pathway inhibitor GN=Tfpi PE=2 SV=1                                  |
| TGM1_RAT  | Protein-glutamine gamma-glutamyltransferase K GN=Tgm1 PE=2 SV=1                    |
| TGON3_RAT | Trans-Golgi network integral membrane protein TGN38 GN=Ttgn1 PE=1 SV=1             |
| THIL_RAT  | Acetyl-CoA acetyltransferase, mitochondrial GN=Acat1 PE=1 SV=1                     |
| THIM_RAT  | 3-ketoacyl-CoA thiolase, mitochondrial GN=Acaa2 PE=2 SV=1                          |
| THIOM_RAT | Thioredoxin, mitochondrial GN=Txn2 PE=2 SV=1                                       |
| THIO_RAT  | Thioredoxin GN=Txn PE=1 SV=2                                                       |
| THOC5_RAT | THO complex subunit 5 homolog GN=Thoc5 PE=2 SV=1                                   |
| THOC6_RAT | THO complex subunit 6 homolog GN=Thoc6 PE=2 SV=1                                   |
| THTM_RAT  | 3-mercaptopyruvate sulfurtransferase GN=Mpst PE=1 SV=3                             |
| TIF1B_RAT | Transcription intermediary factor 1-beta GN=Trim28 PE=1 SV=2                       |
| TIM13_RAT | Mitochondrial import inner membrane translocase subunit Tim13 GN=Timm13 PE=3 SV=1  |
| TIM44_RAT | Mitochondrial import inner membrane translocase subunit TIM44 GN=Timm44 PE=1 SV=1  |
| TIM8A_RAT | Mitochondrial import inner membrane translocase subunit Tim8 A GN=Timm8a PE=1 SV=1 |
| TIM8B_RAT | Mitochondrial import inner membrane translocase subunit Tim8 B GN=Timm8b PE=3 SV=1 |
| TIMP3_RAT | Metalloproteinase inhibitor 3 GN=Timp3 PE=2 SV=1                                   |
| TM109_RAT | Transmembrane protein 109 GN=Tmem109 PE=2 SV=1                                     |
| TM165_RAT | Transmembrane protein 165 GN=Tmem165 PE=2 SV=1                                     |
| TM168_RAT | Transmembrane protein 168 GN=Tmem168 PE=1 SV=1                                     |
| TM214_RAT | Transmembrane protein 214 GN=Tmem214 PE=2 SV=1                                     |
| TM9S1_RAT | Transmembrane 9 superfamily member 1 GN=Tm9sf1 PE=2 SV=1                           |
| TM9S2_RAT | Transmembrane 9 superfamily member 2 GN=Tm9sf2 PE=2 SV=1                           |
| TM9S4_RAT | Transmembrane 9 superfamily member 4 GN=Tm9sf4 PE=2 SV=1                           |
| TMCO1_RAT | Transmembrane and coiled-coil domains protein 1 GN=Tmco1 PE=2 SV=1                 |
| TMED2_RAT | Transmembrane emp24 domain-containing protein 2 GN=Tmed2 PE=1 SV=1                 |
| TMED3_RAT | Transmembrane emp24 domain-containing protein 3 GN=Tmed3 PE=1 SV=1                 |
| TMED5_RAT | Transmembrane emp24 domain-containing protein 5 GN=Tmed5 PE=2 SV=1                 |
| TMED7_RAT | Transmembrane emp24 domain-containing protein 7 GN=Tmed7 PE=1 SV=1                 |
| TMED9_RAT | Transmembrane emp24 domain-containing protein 9 GN=Tmed9 PE=1 SV=1                 |
| TMEDA_RAT | Transmembrane emp24 domain-containing protein 10 GN=Tmed10 PE=1 SV=2               |
| TMM11_RAT | Transmembrane protein 11, mitochondrial GN=Tmem11 PE=2 SV=1                        |
| TMM33_RAT | Transmembrane protein 33 GN=Tmem33 PE=2 SV=1                                       |
| TMM43_RAT | Transmembrane protein 43 GN=Tmem43 PE=2 SV=1                                       |
| TMX2_RAT  | Thioredoxin-related transmembrane protein 2 GN=Tmx2 PE=2 SV=1                      |
| TOLIP_RAT | Toll-interacting protein GN=Tollip PE=2 SV=1                                       |
| TOM22_RAT | Mitochondrial import receptor subunit TOM22 homolog GN=Tomm22 PE=1 SV=1            |
| TOM40_RAT | Mitochondrial import receptor subunit TOM40 homolog GN=Tomm40 PE=1 SV=1            |
| TOM70_RAT | Mitochondrial import receptor subunit TOM70 GN=Tomm70a PE=1 SV=1                   |
| TOP1_RAT  | DNA topoisomerase 1 GN=Top1 PE=2 SV=1                                              |
| TOP2A_RAT | DNA topoisomerase 2-alpha GN=Top2a PE=2 SV=1                                       |
| TPD54_RAT | Tumor protein D54 GN=Tpd52l2 PE=2 SV=1                                             |
| TPIS_RAT  | Triosephosphate isomerase GN=Tpi1 PE=1 SV=2                                        |
| TPM4_RAT  | Tropomyosin alpha-4 chain GN=Tpm4 PE=1 SV=3                                        |
| TPP2_RAT  | Tripeptidyl-peptidase 2 GN=Tpp2 PE=2 SV=3                                          |

|            |                                                                                     |
|------------|-------------------------------------------------------------------------------------|
| TPPC1_RAT  | Trafficking protein particle complex subunit 1 GN=Trappc1 PE=2 SV=1                 |
| TPPC3_RAT  | Trafficking protein particle complex subunit 3 GN=Trappc3 PE=2 SV=1                 |
| TPR_RAT    | Nucleoprotein TPR GN=Tpr PE=1 SV=1                                                  |
| TR150_RAT  | Thyroid hormone receptor-associated protein 3 GN=Thrap3 PE=1 SV=1                   |
| TRA2B_RAT  | Transformer-2 protein homolog beta GN=Tra2b PE=1 SV=1                               |
| TRAM1_RAT  | Translocating chain-associated membrane protein 1 GN=Tram1 PE=2 SV=3                |
| TRAP1_RAT  | Heat shock protein 75 kDa, mitochondrial GN=Trap1 PE=1 SV=1                         |
| TRH_RAT    | Pro-thyrotropin-releasing hormone GN=Trh PE=1 SV=1                                  |
| TRPV2_RAT  | Transient receptor potential cation channel subfamily V member 2 GN=Trpv2 PE=1 SV=2 |
| TRXR1_RAT  | Thioredoxin reductase 1, cytoplasmic GN=Txnrd1 PE=1 SV=5                            |
| TS101_RAT  | Tumor susceptibility gene 101 protein GN=Tsg101 PE=1 SV=1                           |
| TSP4_RAT   | Thrombospondin-4 GN=Thbs4 PE=1 SV=1                                                 |
| TWF1_RAT   | Twinfilin-1 GN=Twf1 PE=2 SV=1                                                       |
| TXD12_RAT  | Thioredoxin domain-containing protein 12 GN=Txndc12 PE=2 SV=2                       |
| TXNL1_RAT  | Thioredoxin-like protein 1 GN=Txnl1 PE=1 SV=3                                       |
| TXTP_RAT   | Tricarboxylate transport protein, mitochondrial GN=Slc25a1 PE=1 SV=1                |
| U520_RAT   | U5 small nuclear ribonucleoprotein 200 kDa helicase GN=Snrnp200 PE=1 SV=1           |
| UB2D2_RAT  | Ubiquitin-conjugating enzyme E2 D2 GN=Ube2d2 PE=1 SV=1                              |
| UB2D3_RAT  | Ubiquitin-conjugating enzyme E2 D3 GN=Ube2d3 PE=2 SV=1                              |
| UBA1_RAT   | Ubiquitin-like modifier-activating enzyme 1 GN=Uba1 PE=1 SV=1                       |
| UBA5_RAT   | Ubiquitin-like modifier-activating enzyme 5 GN=Uba5 PE=2 SV=1                       |
| UBE2N_RAT  | Ubiquitin-conjugating enzyme E2 N GN=Ube2n PE=1 SV=1                                |
| UBP7_RAT   | Ubiquitin carboxyl-terminal hydrolase 7 GN=Usp7 PE=1 SV=1                           |
| UBQL1_RAT  | Ubiquilin-1 GN=Ubqln1 PE=1 SV=1                                                     |
| UBR4_RAT   | E3 ubiquitin-protein ligase UBR4 GN=Ubr4 PE=1 SV=2                                  |
| Uchl3_RAT  | Ubiquitin carboxyl-terminal hydrolase isozyme L3 GN=Uchl3 PE=1 SV=1                 |
| UCRI_RAT   | Cytochrome b-c1 complex subunit Rieske, mitochondrial GN=Uqcrrs1 PE=1 SV=2          |
| UFL1_RAT   | E3 UFM1-protein ligase 1 GN=Ufl1 PE=2 SV=1                                          |
| UFM1_RAT   | Ubiquitin-fold modifier 1 GN=Ufm1 PE=3 SV=1                                         |
| UGDH_RAT   | UDP-glucose 6-dehydrogenase GN=Ugdh PE=2 SV=1                                       |
| UGGG1_RAT  | UDP-glucose:glycoprotein glucosyltransferase 1 GN=Uggt1 PE=1 SV=2                   |
| UN45A_RAT  | Protein unc-45 homolog A GN=Unc45a PE=2 SV=1                                        |
| USMG5_RAT  | Up-regulated during skeletal muscle growth protein 5 GN=Usmg5 PE=1 SV=1             |
| USO1_RAT   | General vesicular transport factor p115 GN=Uso1 PE=1 SV=1                           |
| VAMP3_RAT  | Vesicle-associated membrane protein 3 GN=Vamp3 PE=1 SV=1                            |
| VAMP7_RAT  | Vesicle-associated membrane protein 7 GN=Vamp7 PE=1 SV=1                            |
| VAMP8_RAT  | Vesicle-associated membrane protein 8 GN=Vamp8 PE=1 SV=1                            |
| VAPA_RAT   | Vesicle-associated membrane protein-associated protein A GN=Vapa PE=1 SV=3          |
| VAPB_RAT   | Vesicle-associated membrane protein-associated protein B GN=Vapb PE=1 SV=3          |
| VAT1_RAT   | Synaptic vesicle membrane protein VAT-1 homolog GN=Vat1 PE=1 SV=1                   |
| VATB2_RAT  | V-type proton ATPase subunit B, brain isoform GN=Atp6v1b2 PE=1 SV=1                 |
| VATC1_RAT  | V-type proton ATPase subunit C 1 GN=Atp6v1c1 PE=2 SV=1                              |
| VATE1_RAT  | V-type proton ATPase subunit E 1 GN=Atp6v1e1 PE=1 SV=1                              |
| VATF_RAT   | V-type proton ATPase subunit F GN=Atp6v1f PE=1 SV=1                                 |
| VDAC1_RAT  | Voltage-dependent anion-selective channel protein 1 GN=Vdac1 PE=1 SV=4              |
| VDAC2_RAT  | Voltage-dependent anion-selective channel protein 2 GN=Vdac2 PE=1 SV=2              |
| VIME_RAT   | Vimentin GN=Vim PE=1 SV=2                                                           |
| VINC_RAT   | Vinculin GN=Vcl PE=1 SV=1                                                           |
| VKGC_RAT   | Vitamin K-dependent gamma-carboxylase GN=Ggcx PE=1 SV=1                             |
| VKORL_RAT  | Vitamin K epoxide reductase complex subunit 1-like protein 1 GN=Vkorc1l1 PE=1 SV=1  |
| VMP1_RAT   | Vacuole membrane protein 1 GN=Vmp1 PE=1 SV=1                                        |
| VP26A_RAT  | Vacuolar protein sorting-associated protein 26A GN=Vps26a PE=2 SV=1                 |
| VTI1B_RAT  | Vesicle transport through interaction with t-SNAREs homolog 1B GN=Vti1b PE=1 SV=2   |
| VWA5A_RAT  | von Willebrand factor A domain-containing protein 5A GN=Vwa5a PE=2 SV=1             |
| WDR1_RAT   | WD repeat-containing protein 1 GN=Wdr1 PE=1 SV=3                                    |
| X1WI37_RAT | Protein Gm15013 (Fragment) GN=Gm15013 PE=3 SV=1                                     |
| XPO1_RAT   | Exportin-1 GN=Xpo1 PE=1 SV=1                                                        |
| XPP1_RAT   | Xaa-Pro aminopeptidase 1 GN=Xpnpep1 PE=1 SV=1                                       |
| YBOX1_RAT  | Nuclease-sensitive element-binding protein 1 GN=Ybx1 PE=1 SV=3                      |
| YIPF3_RAT  | Protein YIPF3 GN=Yipf3 PE=2 SV=1                                                    |
| YIPF4_RAT  | Protein YIPF4 GN=Yipf4 PE=2 SV=1                                                    |



|                       |                                                                                 |
|-----------------------|---------------------------------------------------------------------------------|
| Z4YND9_RAT            | Argininosuccinate lyase GN=Asl PE=4 SV=1                                        |
| Z4YNF4_RAT            | Low molecular weight phosphotyrosine protein phosphatase GN=Acp1 PE=4 SV=1      |
| Z4YNR1_RAT            | Protein kinase C delta type GN=Prkcd PE=4 SV=1                                  |
| ZNT1_RAT              | Zinc transporter 1 GN=Slc30a1 PE=2 SV=1                                         |
| ZPI_RAT               | Protein Z-dependent protease inhibitor GN=Serpina10 PE=2 SV=2                   |
| ZW10_RAT              | Centromere/kinetochore protein zw10 homolog GN=Zw10 PE=2 SV=3                   |
| ZWINT_RAT             | ZW10 interactor GN=Zwint PE=1 SV=1                                              |
| sp A0FKI7-2 ACBD5_RAT | Isoform 2 of Acyl-CoA-binding domain-containing protein 5 GN=Acbd5              |
| sp A0FKI7-3 ACBD5_RAT | Isoform 3 of Acyl-CoA-binding domain-containing protein 5 GN=Acbd5              |
| sp A0FKI7 ACBD5_RAT   | Acyl-CoA-binding domain-containing protein 5 GN=Acbd5 PE=1 SV=1                 |
| sp A1L108-2 ARP5L_RAT | Isoform 2 of Actin-related protein 2/3 complex subunit 5-like protein GN=Arpc5l |
| sp A1L108 ARP5L_RAT   | Actin-related protein 2/3 complex subunit 5-like protein GN=Arpc5l PE=1 SV=2    |
| sp A7VJC2 ROA2_RAT    | Heterogeneous nuclear ribonucleoproteins A2/B1 GN=Hnrnpa2b1 PE=1 SV=1           |
| sp B2GV87-2 PTPRE_RAT | Isoform 2 of Receptor-type tyrosine-protein phosphatase epsilon GN=Ptpre        |
| sp B2GV87-3 PTPRE_RAT | Isoform 3 of Receptor-type tyrosine-protein phosphatase epsilon GN=Ptpre        |
| sp B2GV87 PTPRE_RAT   | Receptor-type tyrosine-protein phosphatase epsilon GN=Ptpre PE=2 SV=1           |
| sp B2RZ78 VPS29_RAT   | Vacuolar protein sorting-associated protein 29 GN=Vps29 PE=1 SV=2               |
| sp B3GNI6-2 SEP11_RAT | Isoform 2 of Septin-11 GN=Sept11                                                |
| sp B3GNI6-3 SEP11_RAT | Isoform 3 of Septin-11 GN=Sept11                                                |
| sp B3GNI6 SEP11_RAT   | Septin-11 GN=Sept11 PE=1 SV=1                                                   |
| sp B5DFC9 NID2_RAT    | Nidogen-2 GN=Nid2 PE=2 SV=1                                                     |
| sp D3ZA76 HTRA3_RAT   | Serine protease HTRA3 GN=Htra3 PE=2 SV=1                                        |
| sp F1LP64-2 TRIPC_RAT | Isoform 2 of E3 ubiquitin-protein ligase TRIP12 GN=Trip12                       |
| sp F1LP64 TRIPC_RAT   | E3 ubiquitin-protein ligase TRIP12 GN=Trip12 PE=2 SV=1                          |
| sp O08564 LPP1_RAT    | Lipid phosphate phosphohydrolase 1 GN=Ppap2a PE=1 SV=1                          |
| sp O08623 SQSTM1_RAT  | Sequestosome-1 GN=Sqstm1 PE=1 SV=1                                              |
| sp O35303-4 DNM1L_RAT | Isoform 4 of Dynamin-1-like protein GN=Dnm1l                                    |
| sp O35346 FAK1_RAT    | Focal adhesion kinase 1 GN=Ptk2 PE=1 SV=1                                       |
| sp O35889 AFAD_RAT    | Afadin GN=Mllt4 PE=1 SV=1                                                       |
| sp O54902-2 NRAM2_RAT | Isoform 1 of Natural resistance-associated macrophage protein 2 GN=Slc11a2      |
| sp O55012-2 PICAL_RAT | Isoform 2 of Phosphatidylinositol-binding clathrin assembly protein GN=Picalm   |
| sp O55012 PICAL_RAT   | Phosphatidylinositol-binding clathrin assembly protein GN=Picalm PE=1 SV=1      |
| sp O88797 DAB2_RAT    | Disabled homolog 2 GN=Dab2 PE=1 SV=1                                            |
| sp O88923-2 LPHN2_RAT | Isoform 3 of Latrophilin-2 GN=Lphn2                                             |
| sp O88923-3 LPHN2_RAT | Isoform 4 of Latrophilin-2 GN=Lphn2                                             |
| sp O88923-4 LPHN2_RAT | Isoform 5 of Latrophilin-2 GN=Lphn2                                             |
| sp P00173-2 CYB5_RAT  | Isoform Short of Cytochrome b5 GN=Cyb5a                                         |
| sp P00173 CYB5_RAT    | Cytochrome b5 GN=Cyb5a PE=1 SV=2                                                |
| sp P02680 FIBG_RAT    | Fibrinogen gamma chain GN=Fgg PE=1 SV=3                                         |
| sp P02773 FETA_RAT    | Alpha-fetoprotein GN=Afp PE=2 SV=1                                              |
| sp P04692-2 TPM1_RAT  | Isoform 2 of Tropomyosin alpha-1 chain GN=Tpm1                                  |
| sp P04692-6 TPM1_RAT  | Isoform 6 of Tropomyosin alpha-1 chain GN=Tpm1                                  |
| sp P04692-8 TPM1_RAT  | Isoform 8 of Tropomyosin alpha-1 chain GN=Tpm1                                  |
| sp P04937 FINC_RAT    | Fibronectin GN=Fn1 PE=1 SV=2                                                    |
| sp P06866-2 HPT_RAT   | Isoform 2 of Haptoglobin GN=Hp                                                  |
| sp P06866 HPT_RAT     | Haptoglobin GN=Hp PE=1 SV=3                                                     |
| sp P07872-2 ACOX1_RAT | Isoform 2 of Peroxisomal acyl-coenzyme A oxidase 1 GN=Acox1                     |
| sp P07872 ACOX1_RAT   | Peroxisomal acyl-coenzyme A oxidase 1 GN=Acox1 PE=1 SV=1                        |
| sp P08081-2 CLCA_RAT  | Isoform Non-brain of Clathrin light chain A GN=Clta                             |
| sp P08082-2 CLCB_RAT  | Isoform Non-brain of Clathrin light chain B GN=Cltb                             |
| sp P08644-2 RASK_RAT  | Isoform 2B of GTPase KRas GN=Kras                                               |
| sp P08934-2 KNG1_RAT  | Isoform LMW of Kininogen-1 GN=Kng1                                              |
| sp P09215 KPCD_RAT    | Protein kinase C delta type GN=Prkcd PE=1 SV=1                                  |
| sp P11505-3 AT2B1_RAT | Isoform B of Plasma membrane calcium-transporting ATPase 1 GN=Atp2b1            |
| sp P11505-6 AT2B1_RAT | Isoform K of Plasma membrane calcium-transporting ATPase 1 GN=Atp2b1            |
| sp P11507 AT2A2_RAT   | Sarcoplasmic/endoplasmic reticulum calcium ATPase 2 GN=Atp2a2 PE=1 SV=1         |
| sp P11915 NLTP_RAT    | Non-specific lipid-transfer protein GN=Scp2 PE=1 SV=3                           |
| sp P11980-2 KPYM_RAT  | Isoform M2 of Pyruvate kinase PKM GN=Pkm                                        |
| sp P13084 NPM_RAT     | Nucleophosmin GN=Npm1 PE=1 SV=1                                                 |
| sp P13721 SIAT1_RAT   | Beta-galactoside alpha-2,6-sialyltransferase 1 GN=St6gal1 PE=1 SV=1             |
| sp P14408-2 FUMH_RAT  | Isoform Cytoplasmic of Fumarate hydratase, mitochondrial GN=Fh                  |

|                       |                                                                                                |
|-----------------------|------------------------------------------------------------------------------------------------|
| sp P14408 FUMH_RAT    | Fumarate hydratase, mitochondrial GN=Fh PE=1 SV=1                                              |
| sp P14480 FIBB_RAT    | Fibrinogen beta chain GN=Fgb PE=1 SV=4                                                         |
| sp P15791-2 KCC2D_RAT | Isoform Delta 2 of Calcium/calmodulin-dependent protein kinase type II subunit delta GN=Camk2d |
| sp P15791-5 KCC2D_RAT | Isoform Delta 5 of Calcium/calmodulin-dependent protein kinase type II subunit delta GN=Camk2d |
| sp P15791-6 KCC2D_RAT | Isoform Delta 6 of Calcium/calmodulin-dependent protein kinase type II subunit delta GN=Camk2d |
| sp P15791 KCC2D_RAT   | Calcium/calmodulin-dependent protein kinase type II subunit delta GN=Camk2d PE=1 SV=1          |
| sp P16573-2 CEAM1_RAT | Isoform Short of Carcinoembryonic antigen-related cell adhesion molecule 1 GN=Ceacam1          |
| sp P16573 CEAM1_RAT   | Carcinoembryonic antigen-related cell adhesion molecule 1 GN=Ceacam1 PE=1 SV=3                 |
| sp P16638-2 ACLY_RAT  | Isoform 2 of ATP-citrate synthase GN=Acly                                                      |
| sp P20070-2 NB5R3_RAT | Isoform 2 of NADH-cytochrome b5 reductase 3 GN=Cyb5r3                                          |
| sp P20070-3 NB5R3_RAT | Isoform 3 of NADH-cytochrome b5 reductase 3 GN=Cyb5r3                                          |
| sp P20070 NB5R3_RAT   | NADH-cytochrome b5 reductase 3 GN=Cyb5r3 PE=1 SV=2                                             |
| sp P21775 THIKA_RAT   | 3-ketoacyl-CoA thiolase A, peroxisomal GN=Acaa1a PE=1 SV=2                                     |
| sp P22734-2 COMT_RAT  | Isoform 2 of Catechol O-methyltransferase GN=Comt                                              |
| sp P22734 COMT_RAT    | Catechol O-methyltransferase GN=Comt PE=1 SV=2                                                 |
| sp P23562 B3AT_RAT    | Band 3 anion transport protein GN=Slc4a1 PE=2 SV=3                                             |
| sp P25286-2 VPP1_RAT  | Isoform II of V-type proton ATPase 116 kDa subunit a isoform 1 GN=Atp6v0a1                     |
| sp P25286 VPP1_RAT    | V-type proton ATPase 116 kDa subunit a isoform 1 GN=Atp6v0a1 PE=2 SV=1                         |
| sp P25304-3 AGRIN_RAT | Isoform 3 of Agrin GN=Agrn                                                                     |
| sp P25977 UBF1_RAT    | Nucleolar transcription factor 1 GN=Ubtf PE=1 SV=1                                             |
| sp P26051-2 CD44_RAT  | Isoform 1 of CD44 antigen GN=Cd44                                                              |
| sp P26051 CD44_RAT    | CD44 antigen GN=Cd44 PE=1 SV=2                                                                 |
| sp P26453-2 BASI_RAT  | Isoform 2 of Basigin GN=Bsg                                                                    |
| sp P26453 BASI_RAT    | Basigin GN=Bsg PE=1 SV=2                                                                       |
| sp P27321-2 ICAL_RAT  | Isoform 2 of Calpastatin GN=Cast                                                               |
| sp P27321-3 ICAL_RAT  | Isoform 3 of Calpastatin GN=Cast                                                               |
| sp P27321-4 ICAL_RAT  | Isoform 4 of Calpastatin GN=Cast                                                               |
| sp P27321-5 ICAL_RAT  | Isoform 5 of Calpastatin GN=Cast                                                               |
| sp P27321-6 ICAL_RAT  | Isoform 6 of Calpastatin GN=Cast                                                               |
| sp P27321-7 ICAL_RAT  | Isoform 7 of Calpastatin GN=Cast                                                               |
| sp P27321 ICAL_RAT    | Calpastatin GN=Cast PE=1 SV=3                                                                  |
| sp P27791-2 KAPCA_RAT | Isoform 2 of cAMP-dependent protein kinase catalytic subunit alpha GN=Prkaca                   |
| sp P27791 KAPCA_RAT   | cAMP-dependent protein kinase catalytic subunit alpha GN=Prkaca PE=1 SV=2                      |
| sp P29410-2 KAD2_RAT  | Isoform 2 of Adenylate kinase 2, mitochondrial GN=Ak2                                          |
| sp P29410 KAD2_RAT    | Adenylate kinase 2, mitochondrial GN=Ak2 PE=2 SV=2                                             |
| sp P35213-2 1433B_RAT | Isoform Short of 14-3-3 protein beta/alpha GN=Ywhab                                            |
| sp P35213 1433B_RAT   | 14-3-3 protein beta/alpha GN=Ywhab PE=1 SV=3                                                   |
| sp P37285-3 KLC1_RAT  | Isoform B of Kinesin light chain 1 GN=Klc1                                                     |
| sp P38718-2 MPC2_RAT  | Isoform Short of Mitochondrial pyruvate carrier 2 GN=Mpc2                                      |
| sp P38718 MPC2_RAT    | Mitochondrial pyruvate carrier 2 GN=Mpc2 PE=2 SV=1                                             |
| sp P39052-2 DYN2_RAT  | Isoform 2 of Dynamin-2 GN=Dnm2                                                                 |
| sp P41350 CAV1_RAT    | Caveolin-1 GN=Cav1 PE=1 SV=3                                                                   |
| sp P41498 PPAC_RAT    | Low molecular weight phosphotyrosine protein phosphatase GN=Acp1 PE=1 SV=3                     |
| sp P41499-2 PTN11_RAT | Isoform 2 of Tyrosine-protein phosphatase non-receptor type 11 GN=Ptpn11                       |
| sp P41499 PTN11_RAT   | Tyrosine-protein phosphatase non-receptor type 11 GN=Ptpn11 PE=1 SV=4                          |
| sp P47820 ACE_RAT     | Angiotensin-converting enzyme GN=Ace PE=2 SV=1                                                 |
| sp P49793 NUP98_RAT   | Nuclear pore complex protein Nup98-Nup96 GN=Nup98 PE=1 SV=2                                    |
| sp P50279-2 STX2_RAT  | Isoform 2B of Syntaxin-2 GN=Stx2                                                               |
| sp P50279-3 STX2_RAT  | Isoform 2C of Syntaxin-2 GN=Stx2                                                               |
| sp P50279 STX2_RAT    | Syntaxin-2 GN=Stx2 PE=2 SV=2                                                                   |
| sp P53563-2 B2CL1_RAT | Isoform Bcl-X(S) of Bcl-2-like protein 1 GN=Bcl2l1                                             |
| sp P53563-3 B2CL1_RAT | Isoform Bcl-X(beta) of Bcl-2-like protein 1 GN=Bcl2l1                                          |
| sp P53563 B2CL1_RAT   | Bcl-2-like protein 1 GN=Bcl2l1 PE=1 SV=2                                                       |
| sp P58775-2 TPM2_RAT  | Isoform 2 of Tropomyosin beta chain GN=Tpm2                                                    |
| sp P61203-2 CSN2_RAT  | Isoform 2 of COP9 signalosome complex subunit 2 GN=Cops2                                       |
| sp P61203 CSN2_RAT    | COP9 signalosome complex subunit 2 GN=Cops2 PE=2 SV=1                                          |
| sp P61765-2 STXB1_RAT | Isoform 2 of Syntaxin-binding protein 1 GN=Stxbp1                                              |
| sp P61765 STXB1_RAT   | Syntaxin-binding protein 1 GN=Stxbp1 PE=1 SV=1                                                 |
| sp P62804 H4_RAT      | Histone H4 GN=Hist1h4b PE=1 SV=2                                                               |
| sp P62850-2 RS24_RAT  | Isoform 2 of 40S ribosomal protein S24 GN=Rps24                                                |
| sp P62850-3 RS24_RAT  | Isoform 3 of 40S ribosomal protein S24 GN=Rps24                                                |

|                       |                                                                                                |
|-----------------------|------------------------------------------------------------------------------------------------|
| sp P62850 RS24_RAT    | 40S ribosomal protein S24 GN=Rps24 PE=2 SV=1                                                   |
| sp P62944-2 AP2B1_RAT | Isoform 2 of AP-2 complex subunit beta GN=Ap2b1                                                |
| sp P62944 AP2B1_RAT   | AP-2 complex subunit beta GN=Ap2b1 PE=1 SV=1                                                   |
| sp P62994-2 GRB2_RAT  | Isoform 2 of Growth factor receptor-bound protein 2 GN=Grb2                                    |
| sp P62994 GRB2_RAT    | Growth factor receptor-bound protein 2 GN=Grb2 PE=1 SV=1                                       |
| sp P63095 GNAS2_RAT   | Guanine nucleotide-binding protein G(s) subunit alpha isoforms short GN=Gnas PE=1 SV=1         |
| sp P63100-2 CANB1_RAT | Isoform 2 of Calcineurin subunit B type 1 GN=Ppp3r1                                            |
| sp P63100 CANB1_RAT   | Calcineurin subunit B type 1 GN=Ppp3r1 PE=1 SV=2                                               |
| sp P63329-2 PP2BA_RAT | Isoform 2 of Serine/threonine-protein phosphatase 2B catalytic subunit alpha isoform GN=Ppp3ca |
| sp P63329 PP2BA_RAT   | Serine/threonine-protein phosphatase 2B catalytic subunit alpha isoform GN=Ppp3ca PE=1 SV=1    |
| sp P69897 TBB5_RAT    | Tubulin beta-5 chain GN=Tubb5 PE=1 SV=1                                                        |
| sp P84817 FIS1_RAT    | Mitochondrial fission 1 protein GN=Fis1 PE=1 SV=1                                              |
| sp P97546 NPTN_RAT    | Neuroplastin GN=Nptn PE=1 SV=2                                                                 |
| sp P97633-2 KC1A_RAT  | Isoform 2 of Casein kinase I isoform alpha GN=Csnk1a1                                          |
| sp P97633 KC1A_RAT    | Casein kinase I isoform alpha GN=Csnk1a1 PE=2 SV=1                                             |
| sp P97829-2 CD47_RAT  | Isoform 2 of Leukocyte surface antigen CD47 GN=Cd47                                            |
| sp P97829 CD47_RAT    | Leukocyte surface antigen CD47 GN=Cd47 PE=1 SV=1                                               |
| sp P97840-2 LEG9_RAT  | Isoform Short of Galectin-9 GN=Lgals9                                                          |
| sp P97840 LEG9_RAT    | Galectin-9 GN=Lgals9 PE=2 SV=2                                                                 |
| sp Q00438-2 PTBP1_RAT | Isoform PYBP1 of Polypyrimidine tract-binding protein 1 GN=Ptbp1                               |
| sp Q00438 PTBP1_RAT   | Polypyrimidine tract-binding protein 1 GN=Ptbp1 PE=1 SV=1                                      |
| sp Q00566 MECP2_RAT   | Methyl-CpG-binding protein 2 GN=Mecp2 PE=1 SV=1                                                |
| sp Q02874 H2AY_RAT    | Core histone macro-H2A.1 GN=H2afy PE=1 SV=4                                                    |
| sp Q03626 MUG1_RAT    | Murinoglobulin-1 GN=Mug1 PE=2 SV=1                                                             |
| sp Q05096 MYO1B_RAT   | Unconventional myosin-Ib GN=Myo1b PE=1 SV=1                                                    |
| sp Q05140-2 AP180_RAT | Isoform 2 of Clathrin coat assembly protein AP180 GN=Snap91                                    |
| sp Q05140 AP180_RAT   | Clathrin coat assembly protein AP180 GN=Snap91 PE=1 SV=1                                       |
| sp Q06486 KC1D_RAT    | Casein kinase I isoform delta GN=Csnk1d PE=1 SV=2                                              |
| sp Q07014-2 LYN_RAT   | Isoform LYN B of Tyrosine-protein kinase Lyn GN=Lyn                                            |
| sp Q07014 LYN_RAT     | Tyrosine-protein kinase Lyn GN=Lyn PE=1 SV=3                                                   |
| sp Q07266-2 DREB_RAT  | Isoform E1 of Drebrin GN=Dbn1                                                                  |
| sp Q07266 DREB_RAT    | Drebrin GN=Dbn1 PE=1 SV=3                                                                      |
| sp Q07936 ANXA2_RAT   | Annexin A2 GN=Anxa2 PE=1 SV=2                                                                  |
| sp Q08851-2 STX5_RAT  | Isoform 2 of Syntaxin-5 GN=Stx5                                                                |
| sp Q08851 STX5_RAT    | Syntaxin-5 GN=Stx5 PE=1 SV=2                                                                   |
| sp Q09167 SRF5_RAT    | Serine/arginine-rich splicing factor 5 GN=Srsf5 PE=2 SV=1                                      |
| sp Q10728-2 MYPT1_RAT | Isoform 2 of Protein phosphatase 1 regulatory subunit 12A GN=Ppp1r12a                          |
| sp Q10728-3 MYPT1_RAT | Isoform 3 of Protein phosphatase 1 regulatory subunit 12A GN=Ppp1r12a                          |
| sp Q10728 MYPT1_RAT   | Protein phosphatase 1 regulatory subunit 12A GN=Ppp1r12a PE=1 SV=2                             |
| sp Q11Z53 DNM3A_RAT   | DNA (cytosine-5)-methyltransferase 3A GN=Dnmt3a PE=2 SV=1                                      |
| sp Q2EJA0-3 YAP1_RAT  | Isoform 3 of Yorkie homolog GN=Yap1                                                            |
| sp Q2TA68-3 OPA1_RAT  | Isoform 3 of Dynamin-like 120 kDa protein, mitochondrial GN=Opa1                               |
| sp Q2TA68 OPA1_RAT    | Dynamin-like 120 kDa protein, mitochondrial GN=Opa1 PE=1 SV=1                                  |
| sp Q5FVG2-2 E41L5_RAT | Isoform 2 of Band 4.1-like protein 5 GN=Epb4115                                                |
| sp Q5FVG2 E41L5_RAT   | Band 4.1-like protein 5 GN=Epb4115 PE=2 SV=2                                                   |
| sp Q5M7W5 MAP4_RAT    | Microtubule-associated protein 4 GN=Map4 PE=1 SV=1                                             |
| sp Q5PQX1 TOIP1_RAT   | Torsin-1A-interacting protein 1 GN=Tor1aip1 PE=1 SV=1                                          |
| sp Q5RJY4-2 DRS7B_RAT | Isoform 2 of Dehydrogenase/reductase SDR family member 7B GN=Dhrs7b                            |
| sp Q5RJY4 DRS7B_RAT   | Dehydrogenase/reductase SDR family member 7B GN=Dhrs7b PE=1 SV=1                               |
| sp Q5U312-2 RAI14_RAT | Isoform 2 of Ankycorbin GN=Rai14                                                               |
| sp Q5U312 RAI14_RAT   | Ankycorbin GN=Rai14 PE=2 SV=2                                                                  |
| sp Q5XIE6-2 HIBCH_RAT | Isoform 2 of 3-hydroxyisobutyryl-CoA hydrolase, mitochondrial GN=Hibch                         |
| sp Q5XIE6 HIBCH_RAT   | 3-hydroxyisobutyryl-CoA hydrolase, mitochondrial GN=Hibch PE=1 SV=2                            |
| sp Q62848 ARFG1_RAT   | ADP-ribosylation factor GTPase-activating protein 1 GN=Arfgap1 PE=1 SV=1                       |
| sp Q62871-2 DC1I2_RAT | Isoform 2B of Cytoplasmic dynein 1 intermediate chain 2 GN=Dync1i2                             |
| sp Q62871-3 DC1I2_RAT | Isoform 2C of Cytoplasmic dynein 1 intermediate chain 2 GN=Dync1i2                             |
| sp Q62871 DC1I2_RAT   | Cytoplasmic dynein 1 intermediate chain 2 GN=Dync1i2 PE=1 SV=1                                 |
| sp Q62952-2 DPYL3_RAT | Isoform 2 of Dihydropyrimidinase-related protein 3 GN=Dpysl3                                   |
| sp Q62952 DPYL3_RAT   | Dihydropyrimidinase-related protein 3 GN=Dpysl3 PE=1 SV=2                                      |
| sp Q63028 ADDA_RAT    | Alpha-adducin GN=Add1 PE=2 SV=2                                                                |
| sp Q63135-2 CR1L_RAT  | Isoform 2 of Complement component receptor 1-like protein GN=Cr1l                              |

|                       |                                                                                        |
|-----------------------|----------------------------------------------------------------------------------------|
| sp Q63135 CR1L_RAT    | Complement component receptor 1-like protein GN=Cr1l PE=1 SV=1                         |
| sp Q63151-2 ACSL3_RAT | Isoform Short of Long-chain-fatty-acid--CoA ligase 3 GN=Acsl3                          |
| sp Q63151 ACSL3_RAT   | Long-chain-fatty-acid--CoA ligase 3 GN=Acsl3 PE=1 SV=1                                 |
| sp Q63610 TPM3_RAT    | Tropomyosin alpha-3 chain GN=Tpm3 PE=1 SV=2                                            |
| sp Q63767-2 BCAR1_RAT | Isoform Short of Breast cancer anti-estrogen resistance protein 1 GN=Bcar1             |
| sp Q63767 BCAR1_RAT   | Breast cancer anti-estrogen resistance protein 1 GN=Bcar1 PE=1 SV=1                    |
| sp Q63768 CRK_RAT     | Adapter molecule crk GN=Crk PE=1 SV=1                                                  |
| sp Q63945 SET_RAT     | Protein SET GN=Set PE=2 SV=2                                                           |
| sp Q64559-1 BACH_RAT  | Isoform 1 of Cytosolic acyl coenzyme A thioester hydrolase GN=Acot7                    |
| sp Q64566-2 AT2C1_RAT | Isoform Long of Calcium-transporting ATPase type 2C member 1 GN=Atp2c1                 |
| sp Q64566 AT2C1_RAT   | Calcium-transporting ATPase type 2C member 1 GN=Atp2c1 PE=2 SV=1                       |
| sp Q66HD0 ENPL_RAT    | Endoplasmic reticulum protein GN=Hsp90b1 PE=1 SV=2                                     |
| sp Q68FP1-2 GELS_RAT  | Isoform 2 of Gelsolin GN=Gsn                                                           |
| sp Q68FR9 EF1D_RAT    | Elongation factor 1-delta GN=Eef1d PE=1 SV=2                                           |
| sp Q68FS4-2 AMPL_RAT  | Isoform 2 of Cytosol aminopeptidase GN=Lap3                                            |
| sp Q6AXS5-2 PAIRB_RAT | Isoform 2 of Plasminogen activator inhibitor 1 RNA-binding protein GN=Serbp1           |
| sp Q6AXS5 PAIRB_RAT   | Plasminogen activator inhibitor 1 RNA-binding protein GN=Serbp1 PE=1 SV=2              |
| sp Q6GMN2-2 BAIP2_RAT | Isoform 2 of Brain-specific angiogenesis inhibitor 1-associated protein 2 GN=Baiap2    |
| sp Q6GMN2 BAIP2_RAT   | Brain-specific angiogenesis inhibitor 1-associated protein 2 GN=Baiap2 PE=1 SV=1       |
| sp Q6MG49 BAG6_RAT    | Large proline-rich protein BAG6 GN=Bag6 PE=2 SV=2                                      |
| sp Q6P6T4-2 EMAL2_RAT | Isoform 2 of Echinoderm microtubule-associated protein-like 2 GN=Emi2                  |
| sp Q6P6T4 EMAL2_RAT   | Echinoderm microtubule-associated protein-like 2 GN=Emi2 PE=1 SV=1                     |
| sp Q6PEC3 YIF1B_RAT   | Protein YIF1B GN=Yif1b PE=2 SV=2                                                       |
| sp Q6RJR6-2 RTN3_RAT  | Isoform 2 of Reticulon-3 GN=Rtn3                                                       |
| sp Q6URK4 ROA3_RAT    | Heterogeneous nuclear ribonucleoprotein A3 GN=Hnrnpa3 PE=1 SV=1                        |
| sp Q7TP48 APMAP_RAT   | Adipocyte plasma membrane-associated protein GN=Apmap PE=2 SV=2                        |
| sp Q80WE1-2 FMR1_RAT  | Isoform 2 of Fragile X mental retardation protein 1 homolog GN=Fmr1                    |
| sp Q80WE1 FMR1_RAT    | Fragile X mental retardation protein 1 homolog GN=Fmr1 PE=1 SV=2                       |
| sp Q812D1 PSIP1_RAT   | PC4 and SFRS1-interacting protein GN=Psp1 PE=2 SV=1                                    |
| sp Q8CFN2-2 CDC42_RAT | Isoform 2 of Cell division control protein 42 homolog GN=Cdc42                         |
| sp Q8CFN2 CDC42_RAT   | Cell division control protein 42 homolog GN=Cdc42 PE=1 SV=2                            |
| sp Q8CG09-2 MRP1_RAT  | Isoform 2 of Multidrug resistance-associated protein 1 GN=Abcc1                        |
| sp Q8CG09 MRP1_RAT    | Multidrug resistance-associated protein 1 GN=Abcc1 PE=1 SV=2                           |
| sp Q8CGU6 NICA_RAT    | Nicastrin GN=Ncstn PE=1 SV=1                                                           |
| sp Q8K585 HMGA1_RAT   | High mobility group protein HMG-I/HMG-Y GN=Hmga1 PE=1 SV=3                             |
| sp Q8R4A1 ERO1A_RAT   | ERO1-like protein alpha GN=Ero1l PE=1 SV=1                                             |
| sp Q8R5M4 OPTN_RAT    | Optineurin GN=Optn PE=2 SV=3                                                           |
| sp Q920I0-3 PR8A9_RAT | Isoform 3 of Prolactin-8A9 GN=Prl8a9                                                   |
| sp Q920I0 PR8A9_RAT   | Prolactin-8A9 GN=Prl8a9 PE=2 SV=1                                                      |
| sp Q924C3-2 ENPP1_RAT | Isoform 1 of Ectonucleotide pyrophosphatase/phosphodiesterase family member 1 GN=Enpp1 |
| sp Q924C3 ENPP1_RAT   | Ectonucleotide pyrophosphatase/phosphodiesterase family member 1 GN=Enpp1 PE=1 SV=2    |
| sp Q925G1-2 HDGR2_RAT | Isoform 2 of Hepatoma-derived growth factor-related protein 2 GN=Hdgfrp2               |
| sp Q925G1 HDGR2_RAT   | Hepatoma-derived growth factor-related protein 2 GN=Hdgfrp2 PE=2 SV=2                  |
| sp Q99N37-2 RHG17_RAT | Isoform 2 of Rho GTPase-activating protein 17 GN=Arhgap17                              |
| sp Q99N37-3 RHG17_RAT | Isoform 3 of Rho GTPase-activating protein 17 GN=Arhgap17                              |
| sp Q99N37-4 RHG17_RAT | Isoform 4 of Rho GTPase-activating protein 17 GN=Arhgap17                              |
| sp Q99N37 RHG17_RAT   | Rho GTPase-activating protein 17 GN=Arhgap17 PE=1 SV=1                                 |
| sp Q9EPF2 MUC18_RAT   | Cell surface glycoprotein MUC18 GN=Mcam PE=1 SV=2                                      |
| sp Q9EPH1 A1BG_RAT    | Alpha-1B-glycoprotein GN=A1bg PE=2 SV=2                                                |
| sp Q9JHL4-2 DBNL_RAT  | Isoform 2 of Drebrin-like protein GN=Dbnl                                              |
| sp Q9JHL4-3 DBNL_RAT  | Isoform 3 of Drebrin-like protein GN=Dbnl                                              |
| sp Q9JHL4-4 DBNL_RAT  | Isoform 4 of Drebrin-like protein GN=Dbnl                                              |
| sp Q9JHL4 DBNL_RAT    | Drebrin-like protein GN=Dbnl PE=1 SV=1                                                 |
| sp Q9JHW1 CBPD_RAT    | Carboxypeptidase D GN=Cpd PE=2 SV=2                                                    |
| sp Q9JIL3 ILF3_RAT    | Interleukin enhancer-binding factor 3 GN=Ilf3 PE=1 SV=2                                |
| sp Q9JJ22 ERAP1_RAT   | Endoplasmic reticulum aminopeptidase 1 GN=Erap1 PE=2 SV=2                              |
| sp Q9JJ50-2 HGS_RAT   | Isoform 2 of Hepatocyte growth factor-regulated tyrosine kinase substrate GN=Hgs       |
| sp Q9JJ50 HGS_RAT     | Hepatocyte growth factor-regulated tyrosine kinase substrate GN=Hgs PE=1 SV=1          |
| sp Q9JJ54-3 HNRPD_RAT | Isoform 3 of Heterogeneous nuclear ribonucleoprotein D0 GN=Hnrnpd                      |
| sp Q9JJ54 HNRPD_RAT   | Heterogeneous nuclear ribonucleoprotein D0 GN=Hnrnpd PE=1 SV=1                         |
| sp Q9JK11 RTN4_RAT    | Reticulon-4 GN=Rtn4 PE=1 SV=1                                                          |

|                       |                                                                                           |
|-----------------------|-------------------------------------------------------------------------------------------|
| sp Q9QUR2-2 DCTN4_RAT | Isoform 2 of Dynactin subunit 4 GN=Dctn4                                                  |
| sp Q9QUR2 DCTN4_RAT   | Dynactin subunit 4 GN=Dctn4 PE=1 SV=1                                                     |
| sp Q9QY17-2 PACN2_RAT | Isoform 2 of Protein kinase C and casein kinase substrate in neurons 2 protein GN=Pacsin2 |
| sp Q9QY17-3 PACN2_RAT | Isoform 3 of Protein kinase C and casein kinase substrate in neurons 2 protein GN=Pacsin2 |
| sp Q9QY17-4 PACN2_RAT | Isoform 4 of Protein kinase C and casein kinase substrate in neurons 2 protein GN=Pacsin2 |
| sp Q9QY17 PACN2_RAT   | Protein kinase C and casein kinase substrate in neurons 2 protein GN=Pacsin2 PE=1 SV=2    |
| sp Q9QZR6 SEPT9_RAT   | Septin-9 GN=Sept9 PE=1 SV=1                                                               |
| sp Q9R063 PRDX5_RAT   | Peroxisredoxin-5, mitochondrial GN=Prdx5 PE=1 SV=1                                        |
| sp Q9R080-4 GPSM1_RAT | Isoform 4 of G-protein-signaling modulator 1 GN=Gpsm1                                     |
| sp Q9R080 GPSM1_RAT   | G-protein-signaling modulator 1 GN=Gpsm1 PE=1 SV=2                                        |
| sp Q9ROL4-2 CAND2_RAT | Isoform 2 of Cullin-associated NEDD8-dissociated protein 2 GN=Cand2                       |
| sp Q9R1Z0 VDAC3_RAT   | Voltage-dependent anion-selective channel protein 3 GN=Vdac3 PE=1 SV=2                    |
| sp Q9WU61-3 CLCC1_RAT | Isoform 3 of Chloride channel CLIC-like protein 1 GN=Clcc1                                |
| sp Q9WU61-5 CLCC1_RAT | Isoform 5 of Chloride channel CLIC-like protein 1 GN=Clcc1                                |
| sp Q9WU61 CLCC1_RAT   | Chloride channel CLIC-like protein 1 GN=Clcc1 PE=1 SV=1                                   |
| sp Q9WUD9-2 SRC_RAT   | Isoform 2 of Proto-oncogene tyrosine-protein kinase Src GN=Src                            |
| sp Q9WUD9 SRC_RAT     | Proto-oncogene tyrosine-protein kinase Src GN=Src PE=1 SV=4                               |
| sp Q9WV25-2 PUF60_RAT | Isoform 2 of Poly(U)-binding-splicing factor PUF60 GN=Puf60                               |
| sp Q9WV25 PUF60_RAT   | Poly(U)-binding-splicing factor PUF60 GN=Puf60 PE=2 SV=2                                  |
| sp Q9Z1E1 FLOT1_RAT   | Flotillin-1 GN=Flot1 PE=2 SV=2                                                            |
| sp Q9Z1W6-3 LYRIC_RAT | Isoform 3 of Protein LYRIC GN=Mtdh                                                        |
| sp Q9Z1W6 LYRIC_RAT   | Protein LYRIC GN=Mtdh PE=2 SV=2                                                           |
| sp Q9Z2Q1 SC31A_RAT   | Protein transport protein Sec31A GN=Sec31a PE=1 SV=2                                      |
| sp Q9Z2S9-2 FLOT2_RAT | Isoform 2 of Flotillin-2 GN=Flot2                                                         |
| sp Q9Z2S9-3 FLOT2_RAT | Isoform 4 of Flotillin-2 GN=Flot2                                                         |
| sp Q9Z2S9 FLOT2_RAT   | Flotillin-2 GN=Flot2 PE=1 SV=1                                                            |
